# Supplementary material
Source: PubMed Central journal article supplement (PMC5603230)

## SUPPORTING INFORMATIONS

---

### **$\alpha$ -Ketothioamide derivatives: a promising tool to interrogate phosphoglycerate dehydrogenase (PHGDH)**

S verine Ravez<sup>1#</sup>, Cyril Corbet<sup>2#</sup>, Quentin Spillier<sup>1,2</sup>, Alice Dutu<sup>1</sup>, Anita D. Robin<sup>3</sup>, Edouard Mullarky<sup>3</sup>, Lewis C. Cantley<sup>3</sup>, Olivier Feron<sup>2</sup>, Rapha l Fr d rick<sup>1\*</sup>

<sup>1</sup> Medicinal Chemistry Research Group (CMFA), Louvain Drug Research Institute (LDRI), Universit  Catholique de Louvain, B-1200 Brussels, Belgium.

<sup>2</sup> Pole of Pharmacology and Therapeutics (FATH), Institut de Recherche Exp rimentale et Clinique (IREC), Universit  Catholique de Louvain, B-1200 Brussels, Belgium.

<sup>3</sup> Meyer Cancer Center, Weill Cornell Medical College, New York, NY 10065. Department of Medicine, Weill Cornell Medical College, New York, NY 10065

#### **Content**

|                                                        |    |
|--------------------------------------------------------|----|
| I. Synthetic procedure of compounds <b>20-35</b> ..... | S2 |
| II. Enzymatic assay optimization .....                 | S7 |
| III. NMR Spectral Data .....                           | S9 |

## I. Synthetic procedure of compounds 20-35

***1-(2-Fluorophenyl)-2-morpholino-2-thioxoethanone (20)***. This compound was synthesized according to the general procedure describe above. 1-(2-Fluorophenyl)ethanone (1.50 g, 11.10 mmol) and dibromine (0.65 mL, 13.00 mmol) were mixed in chloroform (15 mL) to obtain the 2-bromo-1-(2-fluorophenyl)-ethanone and this intermediate was reacted in a second time with morpholine (2.84 mL, 32.50 mmol) and sulfur (0.52 g, 16.20 mmol) in DMF (10 mL). Methanol was used for recrystallization to afford the title compound as a yellow solid (1.09 g, 39%).  $R_f$  0.2 (cyclohexane/EtOAc 8:2). Mp: 83-85°C.  $^1\text{H}$  NMR (400 MHz,  $\text{CDCl}_3$ ):  $\delta_{\text{H}}$  (ppm) 3.48-3.50 (m, 2H), 3.71-3.73 (m, 2H), 3.90-3.92 (t, 2H,  $J = 4.8$  Hz), 4.26-4.28 (t, 2H,  $J = 4.8$  Hz), 7.10-7.16 (Ddd, 1 ArH,  $J_{\text{HF}} = 10.9$  Hz  $J_{\text{HH}} = 8.3$  and 1.0 Hz), 7.29-7.33 (DDd, 1 ArH,  $J_{\text{HH}} = 7.8$  and 1.0 Hz), 7.59-7.61 (m, 1 ArH), 8.00-8.05 (Ddd, 1 ArH,  $J_{\text{HF}} = 15.2$  Hz  $J_{\text{HH}} = 7.6$  and 1.9 Hz).  $^{13}\text{C}$  NMR (100 MHz,  $\text{CDCl}_3$ ):  $\delta_{\text{C}}$  (ppm) 44.97, 49.65, 63.86, 63.87, 114.30 (d,  $J_{\text{CF}} = 22$  Hz), 120.91 (d,  $J_{\text{CF}} = 23$  Hz), 122.74 (d,  $J_{\text{CF}} = 23$  Hz), 129.49 (d,  $J_{\text{CF}} = 23$  Hz), 133.76 (d,  $J_{\text{CF}} = 23$  Hz), 158.06 (D,  $J_{\text{CF}} = 255$  Hz), 181.35 (C=O), 194.23 (C=S). HRMS (ESI<sup>+</sup>):  $m/z$  calcd for  $\text{C}_{12}\text{H}_{12}\text{FNO}_2\text{S}$  (M + H)<sup>+</sup> 254.0645, found 254.0644.

***1-(3-Fluorophenyl)-2-morpholino-2-thioxoethanone (21)***. This compound was synthesized according to the general procedure describe above using 2-bromo-1-(3-fluorophenyl)ethanone (0.50 g, 2.30 mmol), morpholine (0.6 mL, 6.90 mmol) and sulfur (0.11 g, 3.45 mmol) in DMF (10 mL). Methanol was used for recrystallization to afford the title compound as a yellow solid (0.13 g, 23%).  $R_f$  0.2 (cyclohexane/EtOAc 8:2). Mp: 95-97°C.  $^1\text{H}$  NMR (400 MHz,  $\text{CDCl}_3$ ):  $\delta_{\text{H}}$  (ppm) 3.59-3.62 (t, 2H,  $J = 4.8$  Hz), 3.70-3.73 (t, 2H,  $J = 4.8$  Hz), 3.90-3.93 (t, 2H,  $J = 4.8$  Hz), 4.32-4.34 (t, 2H,  $J = 4.8$  Hz), 7.30-7.35 (DDdd, 1 ArH,  $J_{\text{HF}} = 16.4$  Hz  $J_{\text{HH}} = 8.1$  and 2.5 Hz), 7.46-7.51 (DDd, 1 ArH,  $J_{\text{HH}} = 8.1$  Hz  $J_{\text{HF}} = 5.4$  Hz), 7.68-7.72 (Ddd, 1 ArH,  $J_{\text{HF}} = 9.0$  Hz  $J_{\text{HH}} = 1.6$  Hz), 7.76-7.78 (Ddd, 1 ArH,  $J_{\text{HH}} = 7.7$  Hz and 1.1 Hz).  $^{13}\text{C}$  NMR (100 MHz,  $\text{CDCl}_3$ ):  $\delta_{\text{C}}$  (ppm) 47.07, 51.87, 66.25, 66.38, 116.03 (d,  $J_{\text{CF}} = 23$  Hz), 121.31 (d,  $J_{\text{CF}} = 23$  Hz), 125.59 (d,  $J_{\text{CF}} = 23$  Hz), 130.58 (d,  $J_{\text{CF}} = 23$  Hz), 135.34 (d,  $J_{\text{CF}} = 23$  Hz), 161.45 (D,  $J_{\text{CF}} = 247$  Hz), 186.05 (C=O), 194.59 (C=S). HRMS (ESI<sup>+</sup>):  $m/z$  calcd for  $\text{C}_{12}\text{H}_{12}\text{FNO}_2\text{S}$  (M + H)<sup>+</sup> 254.0645, found 254.0644.

***1-(4-Fluorophenyl)-2-morpholino-2-thioxoethanone (22)***. This compound was synthesized according to the general procedure describe above using 2-bromo-1-(4-fluorophenyl)ethanone (0.50 g, 2.30 mmol), morpholine (0.6 mL, 6.90 mmol) and sulfur (0.11 g, 3.45 mmol) in DMF

(10 mL). Methanol was used for recrystallization to afford the title compound as a beige solid (0.23 g, 41%).  $R_f$  0.2 (cyclohexane/EtOAc 8:2). Mp: 131-133°C.  $^1\text{H}$  NMR (400 MHz,  $\text{CDCl}_3$ ):  $\delta_{\text{H}}$  (ppm) 3.59-3.71 (m, 4H), 3.89-3.91 (t, 2H,  $J = 4.8$  Hz), 4.31-4.34 (t, 2H,  $J = 4.8$  Hz), 7.15-7.19 (m, 2 ArH), 8.02-8.05 (m, 2 ArH).  $^{13}\text{C}$  NMR (100 MHz,  $\text{CDCl}_3$ ):  $\delta_{\text{C}}$  (ppm) 47.17, 51.97, 66.39, 66.53, 116.19 (2C, d,  $J = 22$  Hz), 129.74, 132.63 (2C, d,  $J = 9$  Hz), 165.17 (D,  $J = 257$  Hz), 186.38 (C=O), 195.16 (C=S). HRMS (ESI<sup>+</sup>):  $m/z$  calcd for  $\text{C}_{12}\text{H}_{12}\text{FNO}_2\text{S}$  ( $\text{M} + \text{H}$ )<sup>+</sup> 254.0645, found 254.0642.

***1-(2-Chlorophenyl)-2-morpholino-2-thioxoethanone (23)***. This compound was synthesized according to the general procedure describe above using 2-bromo-1-(2-chlorophenyl)ethanone (0.50 g, 2.14 mmol), morpholine (0.56 mL, 6.42 mmol) and sulfur (0.10 g, 3.21 mmol) in DMF (10 mL). Acetonitrile was used for recrystallization to afford the title compound as a yellow solid (0.20 g, 36%).  $R_f$  0.3 (cyclohexane/EtOAc 8:2). Mp: 78-80°C.  $^1\text{H}$  NMR (400 MHz,  $\text{CDCl}_3$ ):  $\delta_{\text{H}}$  (ppm) 3.82-3.92 (m, 6H), 4.26-4.28 (m, 2H), 7.40-7.60 (m, 3 ArH), 7.92-7.94 (m, 1 ArH).  $^{13}\text{C}$  NMR (100 MHz,  $\text{CDCl}_3$ ):  $\delta_{\text{C}}$  (ppm) 47.70, 52.15, 66.01, 66.06, 127.29, 130.73, 132.41, 132.69, 133.80, 134.58, 185.07 (C=O), 195.72 (C=S). HRMS (ESI<sup>+</sup>):  $m/z$  calcd for  $\text{C}_{12}\text{H}_{13}\text{ClNO}_2\text{S}$  ( $\text{M} + \text{H}$ )<sup>+</sup> 270.0350, found 270.0350.

***1-(3-Chlorophenyl)-2-morpholino-2-thioxoethanone (24)***. This compound was synthesized according to the general procedure describe above. 1-(3-Chlorophenyl)ethanone (2.00 g, 12.90 mmol) and dibromine (0.78 mL, 15.50 mmol) were mixed in chloroform (15 mL) to obtain the 2-bromo-1-(3-chlorophenyl)-ethanone and this intermediate was reacted in a second time with morpholine (3.38 mL, 38.80 mmol) and sulfur (0.62 g, 19.40 mmol) in DMF (10 mL). The residue was purified by silica gel chromatography (cyclohexane/EtOAc, 8:2) and the obtained oil was collected by filtration with diethyl ether to give the title compound as a yellow solid (1.50 g, 43%).  $R_f$  0.2 (cyclohexane/EtOAc 8:2). Mp: 92-94°C.  $^1\text{H}$  NMR (400 MHz,  $\text{CDCl}_3$ ):  $\delta_{\text{H}}$  (ppm) 3.59-3.61 (t, 2H,  $J = 4.8$  Hz), 3.70-3.72 (t, 2H,  $J = 4.8$  Hz), 3.90-3.92 (t, 2H,  $J = 4.8$  Hz), 4.31-4.33 (t, 2H,  $J = 4.8$  Hz), 7.42-7.46 (DD, 1 ArH,  $J = 7.8$  Hz), 7.57-7.59 (Ddd, 1 ArH,  $J = 8.0$  and 1.0 Hz), 7.85-7.87 (Ddd, 1 ArH,  $J = 7.8$  and 1.4 Hz), 7.96-7.97 (dd, 1 ArH,  $J = 1.8$  Hz).  $^{13}\text{C}$  NMR (100 MHz,  $\text{CDCl}_3$ ):  $\delta_{\text{C}}$  (ppm) 47.21, 52.00, 66.39, 66.52, 127.98, 129.61, 130.28, 134.33, 135.05, 135.30, 186.07 (C=O), 194.60 (C=S). HRMS (ESI<sup>+</sup>):  $m/z$  calcd for  $\text{C}_{12}\text{H}_{12}\text{ClNO}_2\text{S}$  ( $\text{M} + \text{H}$ )<sup>+</sup> 270.0277, found 270.0278.

***1-(4-Chlorophenyl)-2-morpholino-2-thioxoethanone (25)***. This compound was synthesized according to the general procedure describe above using 2-bromo-1-(2-chlorophenyl)ethanone (0.50 g, 2.14 mmol), morpholine (0.56 mL, 6.42 mmol) and sulfur (0.10 g, 3.21 mmol) in DMF (10 mL). Acetonitrile was used for recrystallization to afford the title compound as a yellow solid (0.22 g, 38%).  $R_f$  0.2 (cyclohexane/EtOAc 8:2). Mp: 135-137°C.  $^1\text{H}$  NMR (400 MHz,  $\text{CDCl}_3$ ):  $\delta_{\text{H}}$  (ppm) 3.58-3.71 (m, 4H), 3.89-3.92 (t, 2H,  $J = 4.8$  Hz), 4.31-4.33 (t, 2H,  $J = 4.8$  Hz), 7.46-7.48 (d, 2 ArH,  $J = 8.8$  Hz), 7.93-7.95 (d, 2 ArH,  $J = 8.6$  Hz).  $^{13}\text{C}$  NMR (100 MHz,  $\text{CDCl}_3$ ):  $\delta_{\text{C}}$  (ppm) 47.18, 51.97, 66.39, 66.53, 129.36 (2C), 131.22 (2C), 131.74, 141.06, 186.45 (C=O), 194.94 (C=S). HRMS (ESI<sup>+</sup>):  $m/z$  calcd for  $\text{C}_{12}\text{H}_{13}\text{ClNO}_2\text{S}$  (M + H)<sup>+</sup> 270.0350, found 270.0350.

***1-(2-Bromophenyl)-2-morpholino-2-thioxoethanone (26)***. This compound was synthesized according to the general procedure describe above using 2-bromo-1-(2-bromophenyl)-ethanone (0.50 g, 1.81 mmol), morpholine (0.48 mL, 5.43 mmol) and sulfur (0.08 g, 2.72 mmol) in DMF (10 mL). Ethanol was used for recrystallization to afford the title compound as a colorless solid (0.28 g, 52%).  $R_f$  0.3 (cyclohexane/EtOAc 8:2). Mp: 81-83°C.  $^1\text{H}$  NMR (400 MHz,  $\text{CDCl}_3$ ):  $\delta_{\text{H}}$  (ppm) 3.48-3.85 (m, 4H), 3.90-3.92 (t, 2H,  $J = 4.8$  Hz), 4.25-4.28 (t, 2H,  $J = 4.8$  Hz), 7.27-7.40 (ddd, 1 ArH,  $J = 1.8$  and 7.8 Hz), 7.40-7.46 (ddd, 1 ArH,  $J = 1.2$  and 7.5 Hz), 7.59-7.62 (dd, 1 ArH,  $J = 1.1$  and 7.9 Hz), 7.84-7.87 (dd, 1 ArH,  $J = 1.8$  and 7.6 Hz).  $^{13}\text{C}$  NMR (100 MHz,  $\text{CDCl}_3$ ):  $\delta_{\text{C}}$  (ppm) 47.86, 52.28, 66.02, 66.05, 120.59, 127.69, 132.96, 133.64, 134.02, 136.45, 185.56 (C=O), 194.99 (C=S). HRMS (ESI<sup>+</sup>):  $m/z$  calcd for  $\text{C}_{12}\text{H}_{12}\text{BrNO}_2\text{S}$  (M + H)<sup>+</sup> 313.9844, found 313.9845.

***1-(3-Bromophenyl)-2-morpholino-2-thioxoethanone (27)***. This compound was synthesized according to the general procedure describe above using 2-bromo-1-(3-bromophenyl)-ethanone (0.50 g, 1.81 mmol), morpholine (0.48 mL, 5.43 mmol) and sulfur (0.08 g, 2.72 mmol) in DMF (10 mL). Methanol was used for recrystallization to afford the title compound as a colorless solid (0.14 g, 26%).  $R_f$  0.2 (cyclohexane/EtOAc 8:2). Mp: 104-106°C.  $^1\text{H}$  NMR (400 MHz,  $\text{CDCl}_3$ ):  $\delta_{\text{H}}$  (ppm) 3.61-3.64 (t, 2H,  $J = 4.8$  Hz), 3.72-3.74 (t, 2H,  $J = 4.8$  Hz), 3.90-3.93 (t, 2H,  $J = 4.8$  Hz), 4.33-4.35 (t, 2H,  $J = 4.8$  Hz), 7.36-7.40 (m, 1 ArH), 7.73-7.75 (m, 1 ArH), 7.90-7.92 (m, 1 ArH), 8.13-8.15 (m, 1 ArH).  $^{13}\text{C}$  NMR (100 MHz,  $\text{CDCl}_3$ ):  $\delta_{\text{C}}$  (ppm) 44.79, 49.58, 63.97, 64.11, 120.80, 126.03, 128.08, 130.10, 132.81, 134.81, 183.54 (C=O), 192.09 (C=S). HRMS (ESI<sup>+</sup>):  $m/z$  calcd for  $\text{C}_{12}\text{H}_{12}\text{BrNO}_2\text{S}$  (M + H)<sup>+</sup> 313.9844, found 313.9844.

***1-(4-Bromophenyl)-2-morpholino-2-thioxoethanone (28)***. This compound was synthesized according to the general procedure describe above using 2-bromo-1-(4-bromophenyl)-ethanone (0.50 g, 1.81 mmol), morpholine (0.47 mL, 5.44 mmol) and sulfur (0.08 g, 2.71 mmol) in DMF (10 mL). Cyclohexane was used for recrystallization to afford the title compound as a colorless solid (0.11 g, 19%).  $R_f$  0.2 (cyclohexane/EtOAc 8:2). Mp: 157-159°C.  $^1\text{H}$  NMR (400 MHz,  $\text{CDCl}_3$ ):  $\delta_{\text{H}}$  (ppm) 3.58-3.61 (t, 2H,  $J = 4.8$  Hz), 3.69-3.72 (t, 2H,  $J = 4.8$  Hz), 3.89-3.92 (t, 2H,  $J = 4.8$  Hz), 4.31-4.34 (t, 2H,  $J = 4.8$  Hz), 7.63-7.65 (D, 2 ArH,  $J = 8.6$  Hz), 7.85-7.87 (D, 2 ArH,  $J = 8.6$  Hz).  $^{13}\text{C}$  NMR (100 MHz,  $\text{CDCl}_3$ ):  $\delta_{\text{C}}$  (ppm) 47.18, 51.97, 66.39, 66.54, 129.91, 131.26 (2C), 132.17, 132.35 (2C), 186.59 (C=O), 194.89 (C=S). HRMS (ESI<sup>+</sup>):  $m/z$  calcd for  $\text{C}_{12}\text{H}_{12}\text{BrNO}_2\text{S}$  (M + H)<sup>+</sup> 313.9844, found 313.9841.

***1-(2-Iodophenyl)-2-morpholino-2-thioxoethanone (29)***. This compound was synthesized according to the general procedure describe above. 1-(2-Iodophenyl)ethanone (1.00 g, 4.00 mmol) and dibromine (0.24 mL, 4.87 mmol) were mixed in chloroform (15 mL) to obtain the 2-bromo-1-(2-iodophenyl)-ethanone and this intermediate was reacted in a second time with morpholine (1.06 mL, 12.20 mmol) and sulfur (0.19 g, 6.10 mmol) in DMF (10 mL). The residue was purified by silica gel chromatography (cyclohexane/EtOAc, 8:2) to give the title compound as a yellow oil (0.70 g, 47%).  $R_f$  0.2 (cyclohexane/EtOAc 8:2).  $^1\text{H}$  NMR (400 MHz,  $\text{CDCl}_3$ ):  $\delta_{\text{H}}$  (ppm) 3.80-3.85 (m, 4H), 3.91-3.93 (t, 2H,  $J = 4.8$  Hz), 4.27-4.30 (t, 2H,  $J = 4.8$  Hz), 7.17-7.21 (DDd, 1 ArH,  $J = 7.5$  and 1.5 Hz), 7.43-7.47 (Ddd, 1 ArH,  $J = 7.5$  and 1.1 Hz), 7.74-7.77 (Dd, 1 ArH,  $J = 7.8$  and 1.5 Hz), 7.97-7.99 (Dd, 1 ArH,  $J = 7.9$  and 1.1 Hz). HRMS (ESI<sup>+</sup>):  $m/z$  calcd for  $\text{C}_{12}\text{H}_{13}\text{INO}_2\text{S}$  (M + H)<sup>+</sup> 361.9706, found 361.9706.

***1-(3-Iodophenyl)-2-morpholino-2-thioxoethanone (30)***. This compound was synthesized according to the general procedure describe above. 1-(3-Iodophenyl)ethanone (1.00 g, 4.06 mmol) and dibromine (0.24 mL, 4.87 mmol) were mixed in chloroform (15 mL) to obtain the 2-bromo-1-(3-iodophenyl)-ethanone and this intermediate was reacted in a second time with morpholine (1.07 mL, 12.18 mmol) and sulfur (0.19 g, 6.09 mmol) in DMF (10 mL). The residue was purified by silica gel chromatography (cyclohexane/EtOAc, 8:2) to give the title compound as a yellow solid (0.75 g, 51%).  $R_f$  0.3 (cyclohexane/EtOAc 8:2).  $^1\text{H}$  NMR (400 MHz,  $\text{CDCl}_3$ ):  $\delta_{\text{H}}$  (ppm) 3.60-3.625 (t, 2H,  $J = 4.8$  Hz), 3.70-3.72 (t, 2H,  $J = 4.8$  Hz), 3.91-3.93 (t, 2H,  $J = 4.8$  Hz), 4.31-4.33 (t, 2H,  $J = 4.8$  Hz), 7.21-7.25 (DD, 1 ArH,  $J = 7.8$  Hz),

7.92-7.94 (Dd, 2 ArH,  $J = 7.1$  and  $0.7$  Hz), 8.32-8.33 (dd, 1 ArH,  $J = 1.6$  Hz).  $^{13}\text{C}$  NMR (100 MHz,  $\text{CDCl}_3$ ):  $\delta_{\text{C}}$  (ppm) 46.60, 51.40, 65.79, 65.92, 93.94, 128.43, 129.94, 134.59, 137.76, 142.47, 185.29 (C=O), 193.88 (C=S). HRMS (ESI<sup>+</sup>):  $m/z$  calcd for  $\text{C}_{12}\text{H}_{13}\text{INO}_2\text{S}$  ( $\text{M} + \text{H}$ )<sup>+</sup> 361.9706, found 361.9704.

***1-(4-Iodophenyl)-2-morpholino-2-thioxoethanone (31)***. This compound was synthesized according to the general procedure describe above. 1-(4-Iodophenyl)ethanone (1.00 g, 4.06 mmol) and dibromine (0.24 mL, 4.87 mmol) were mixed in chloroform (15 mL) to obtain the 2-bromo-1-(3-iodophenyl)-ethanone and this intermediate was reacted in a second time with morpholine (1.07 mL, 12.18 mmol) and sulfur (0.19 g, 6.09 mmol) in DMF (10 mL). The residue was purified by silica gel chromatography (cyclohexane/EtOAc, 8:2) to give the title compound as a yellow solid (0.92 g, 63%).  $R_f$  0.3 (cyclohexane/EtOAc 8:2). Mp: 175-177°C.  $^1\text{H}$  NMR (400 MHz,  $\text{CDCl}_3$ ):  $\delta_{\text{H}}$  (ppm) 3.59 (m, 4H), 3.82 (t, 2H,  $J = 4.8$  Hz), 4.21 (t, 2H,  $J = 4.8$  Hz), 7.67 (D, 2 ArH,  $J = 8.1$  Hz), 7.98 (D, 2ArH,  $J = 8.1$  Hz).  $^{13}\text{C}$  NMR (100 MHz,  $\text{CDCl}_3$ ):  $\delta_{\text{C}}$  (ppm) 46,92, 51.83, 65.54, 65.88, 103.86, 130.92 (2C), 132.27, 138.13 (2C), 186.51 (C=O), 192.99 (C=S). HRMS (ESI<sup>+</sup>):  $m/z$  calcd for  $\text{C}_{12}\text{H}_{13}\text{INO}_2\text{S}$  ( $\text{M} + \text{H}$ )<sup>+</sup> 361.9706, found 361.9705.

***1-(2-Nitrophenyl)-2-morpholino-2-thioxoethanone (32)***. This compound was synthesized according to the general procedure describe above using 2-bromo-1-(2-nitrophenyl)-ethanone (0.50 g, 2.05 mmol), morpholine (0.54 mL, 6.17 mmol), and sulfur (0.09 g, 3.07 mmol) in DMF (10 mL). A mixture of cyclohexane/EtOAc (8:2) was used for recrystallization to afford the title compound as a yellow solid (0.15 g, 26%).  $R_f$  0.3 (cyclohexane/EtOAc 8:2).  $^1\text{H}$  NMR (400 MHz,  $\text{CDCl}_3$ ):  $\delta_{\text{H}}$  (ppm) 3.86-3.88 (t, 2H,  $J = 4.8$  Hz), 3.94-3.96 (t, 2H,  $J = 4.8$  Hz), 4.11-4.13 (t, 2H,  $J = 4.8$  Hz), 4.22-4.24 (t, 2H,  $J = 4.8$  Hz), 7.62-7.66 (m, 1 ArH), 7.74-7.78 (m, 1 ArH), 7.84-7.86 (m, 1 ArH), 8.04-8.06 (m, 1 ArH).  $^{13}\text{C}$  NMR (100 MHz,  $\text{CDCl}_3$ ):  $\delta_{\text{C}}$  (ppm) 49.06, 52.33, 66.36, 66.71, 123.84, 131.70, 132.57, 134.03, 134.92, 145.78, 182.95 (C=O), 191.17 (C=S). HRMS (ESI<sup>+</sup>):  $m/z$  calcd for  $\text{C}_{12}\text{H}_{12}\text{N}_2\text{O}_4\text{S}$  ( $\text{M} + \text{H}$ )<sup>+</sup> 281.0590, found 281.0586.

***1-(3-Nitrophenyl)-2-morpholino-2-thioxoethanone (33)***. This compound was synthesized according to the general procedure describe above using commercial 2-bromo-1-(3-nitrophenyl)-ethanone (1.50 g, 6.17 mmol), morpholine (1.61 mL, 18.52 mmol) and sulfur (0.29 g, 9.26 mmol) in DMF (10 mL). Methanol was used for recrystallization to afford the

title compound as a yellow solid (1.26 g, 73%).  $R_f$  0.1 (cyclohexane/EtOAc 8:2). Mp: 179-181°C.  $^1\text{H}$  NMR (400 MHz,  $\text{CDCl}_3$ ):  $\delta_{\text{H}}$  (ppm) 3.58-3.60 (t, 2H,  $J = 4.8$  Hz), 3.67-3.69 (t, 2H,  $J = 4.8$  Hz), 3.86-3.89 (t, 2H,  $J = 4.8$  Hz), 4.28-4.30 (t, 2H,  $J = 4.8$  Hz), 7.63-7.67 (DD, 1 ArH,  $J = 8.6$  Hz), 8.26-8.29 (m, 1 ArH), 8.38-8.40 (m, 1 ArH), 8.73-8.74 (dd, 1 ArH,  $J = 1.9$  Hz).  $^{13}\text{C}$  NMR (100 MHz,  $\text{CDCl}_3$ ):  $\delta_{\text{C}}$  (ppm) 47.42, 52.12, 66.41, 66.57, 124.56, 128.36, 130.20, 135.18, 148.51, 184.29 (C=O), 193.48 (C=S). HRMS (ESI<sup>+</sup>):  $m/z$  calcd for  $\text{C}_{12}\text{H}_{12}\text{N}_2\text{O}_4\text{S}$  (M + H)<sup>+</sup> 281.0590, found 281.0588.

***1-(4-Nitrophenyl)-2-morpholino-2-thioxoethanone (34)***. This compound was synthesized according to the general procedure describe above using commercial 2-bromo-1-(4-nitrophenyl)-ethanone (1.50 g, 6.17 mmol), morpholine (1.61 mL, 18.52 mmol) and sulfur (0.29 g, 9.26 mmol) in DMF (10 mL). Methanol was used for recrystallization to afford the title compound as a yellow solid (0.81 g, 47%).  $R_f$  0.1 (cyclohexane/EtOAc 8:2). Mp: 171-173°C.  $^1\text{H}$  NMR (400 MHz,  $\text{CDCl}_3$ ):  $\delta_{\text{H}}$  (ppm) 3.59 (t, 2H,  $J = 4.8$  Hz), 3.73 (t, 2H,  $J = 4.8$  Hz), 3.92 (t, 2H,  $J = 4.8$  Hz), 4.33 (t, 2H,  $J = 4.8$  Hz), 8.16 (D, 2 ArH,  $J = 8.2$  Hz), 8.32 (D, 2 ArH,  $J = 8.2$  Hz). HRMS (ESI<sup>+</sup>):  $m/z$  calcd for  $\text{C}_{12}\text{H}_{12}\text{N}_2\text{O}_4\text{S}$  (M + H)<sup>+</sup> 281.0590, found 281.0588.

***1-([1,1'-biphenyl]-4-yl)-2-morpholino-2-thioxoethanone (35)***. This compound was synthesized according to the general procedure describe above using commercial 1-([1,1'-biphenyl]-4-yl)-2-bromoethanone (1.00 g, 3.64 mmol), morpholine (0.94 mL, 10.92 mmol) and sulfur (0.17 g, 5.46 mmol) in DMF (10 mL). The residue was purified by silica gel chromatography (cyclohexane/EtOAc, 8:2) to give the title compound as a yellow solid (0.69 g, 61%).  $R_f$  0.2 (cyclohexane/EtOAc 8:2). Mp: 132-134°C.  $^1\text{H}$  NMR (400 MHz,  $\text{CDCl}_3$ ):  $\delta_{\text{H}}$  (ppm) 3.55-3.58 (t, 2H,  $J = 4.8$  Hz), 3.68-3.71 (t, 2H,  $J = 4.8$  Hz), 3.82-3.85 (t, 2H,  $J = 4.8$  Hz), 4.28-4.30 (t, 2H,  $J = 4.8$  Hz), 7.32-7.45 (m, 3 ArH), 7.52-7.55 (m, 2 ArH), 7.61-7.63 (D, 2 ArH,  $J = 8.5$  Hz), 7.99-8.01 (D, 2 ArH,  $J = 8.5$  Hz).  $^{13}\text{C}$  NMR (100 MHz,  $\text{CDCl}_3$ ):  $\delta_{\text{C}}$  (ppm) 45.93, 50.75, 65.19, 65.34, 126.12 (2C), 126.40 (2C), 127.38, 127.84 (2C), 129.23 (2C), 130.72, 138.32, 146.01, 186.33 (C=O), 194.52 (C=S). HRMS (ESI<sup>+</sup>):  $m/z$  calcd for  $\text{C}_{18}\text{H}_{17}\text{NO}_2\text{S}$  (M + H)<sup>+</sup> 312.1052, found 312.1052.

## II. Enzymatic assay optimization

PHGDH oxidizes 3-PG to 3-PPyr with  $\text{NAD}^+$  as the electron acceptor to yield NADH. The formation of 3-PPyr is directly correlated with the NADH formation (Ex 340 nm / Em 460 nm). Thus, the enzymatic activity of PHGDH can be monitored by following the fluorescence intensity at an excitation wavelength of 340 nm and emission wavelength of 460 nm. Prior to developing a robust quantitative assay, we initially set out to optimize the activity of the PHGDH. Oxidoreductase activity was screened at varying enzyme, cofactor and substrate concentrations by monitoring the oxidation of NADH spectrophotometrically. The tolerance of the enzymatic assay to DMSO was studied at a DMSO concentration ranging from 5% to 20% (**Fig. S1**). For this present study, the concentrations of Tris HCl pH 8.8, NaCl and DTT were set at 100 mM, 400 mM and 0.2 mM, respectively, and the temperature was kept at 25°C.

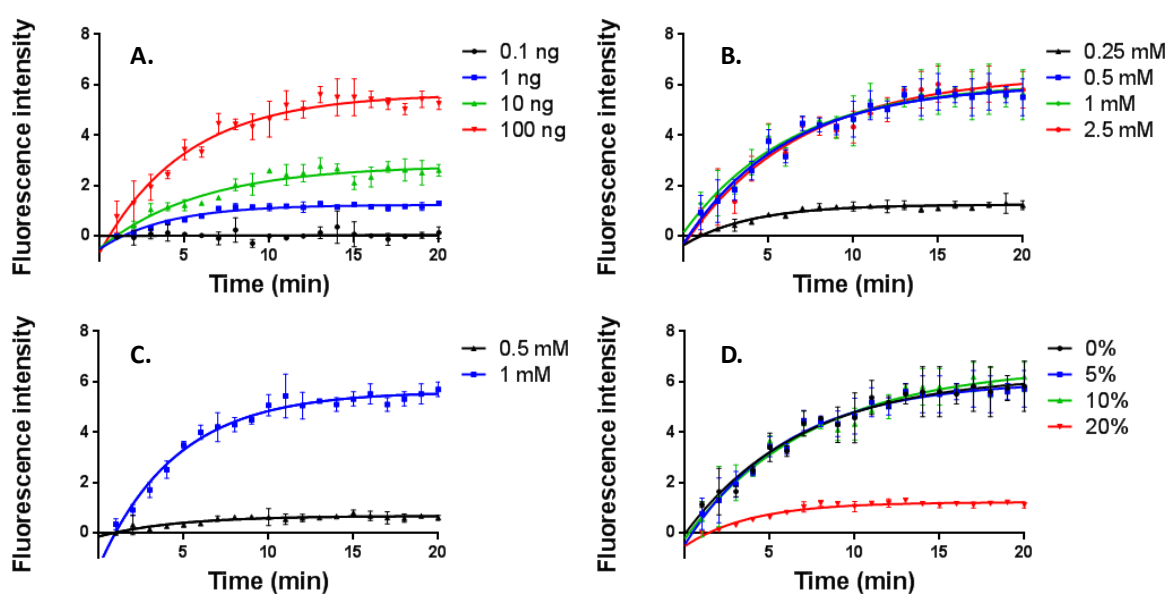

**Figure S1.** Optimization of the enzymatic assay for drug screening. (A) Variation of PHGDH concentration (2.5 mM 3-PG, 1 mM NAD). (B) Variation of 3-PG concentration (100 ng PHGDH, 1 mM NAD). (C) Variation of NAD concentration (100 ng PHGDH, 2.5 mM 3-PG). (D) Influence of DMSO (100 ng PHGDH, 2.5 mM 3-PG, 1 mM NAD). Data were analyzed using GraphPad software.

Minimizing the amount of enzyme was an important consideration for controlling the cost of assays. Thus, we sought to determine enzyme concentrations that would generate a sufficient fluorescent signal. Representative curves obtained with PHGDH quantity ranging from 1 ng to 100 ng, are shown in **Fig. S1A**. As depicted, a quantity of 100 ng of PHGDH was sufficient to achieve a robust assay window. The concentration of 3-PG and  $\text{NAD}^+$  in an assay is also an important consideration. Concentration of 3-PG was varied between 0.25 and 2.5 mM and two concentrations of  $\text{NAD}^+$  were evaluated (**Fig. S1B** and **Fig. S1C**). Optimal concentrations of 3-PG and NAD were 0.5 mM and 1 mM respectively to detect a correct fluorescent signal. Compounds from the database were stored at 10 mM in DMSO and the final concentration of DMSO in assay solutions was 10%. As depicted in



**Fig. S1D**, this percentage of DMSO was tolerated by PHGDH. Thus, the optimized conditions consisted of PHGDH (100 ng), 3-PG (0.5 mM), and NAD (1 mM). In these conditions, the rate of substrate conversion was found to be linear during the five first minutes. The  $K_m$  value of 3-PG was then determined by fitting the data to the Michaelis–Menten equation. The calculated  $K_m$  value ( $0.19 \pm 0.03$  mM) is consistent with the reported  $K_m$  value of  $0.26 \pm 0.03$  mM.

### **III. NMR Spectral Data**

1-Phenyl-2-morpholino-2-thioxoethanone (19)

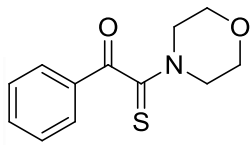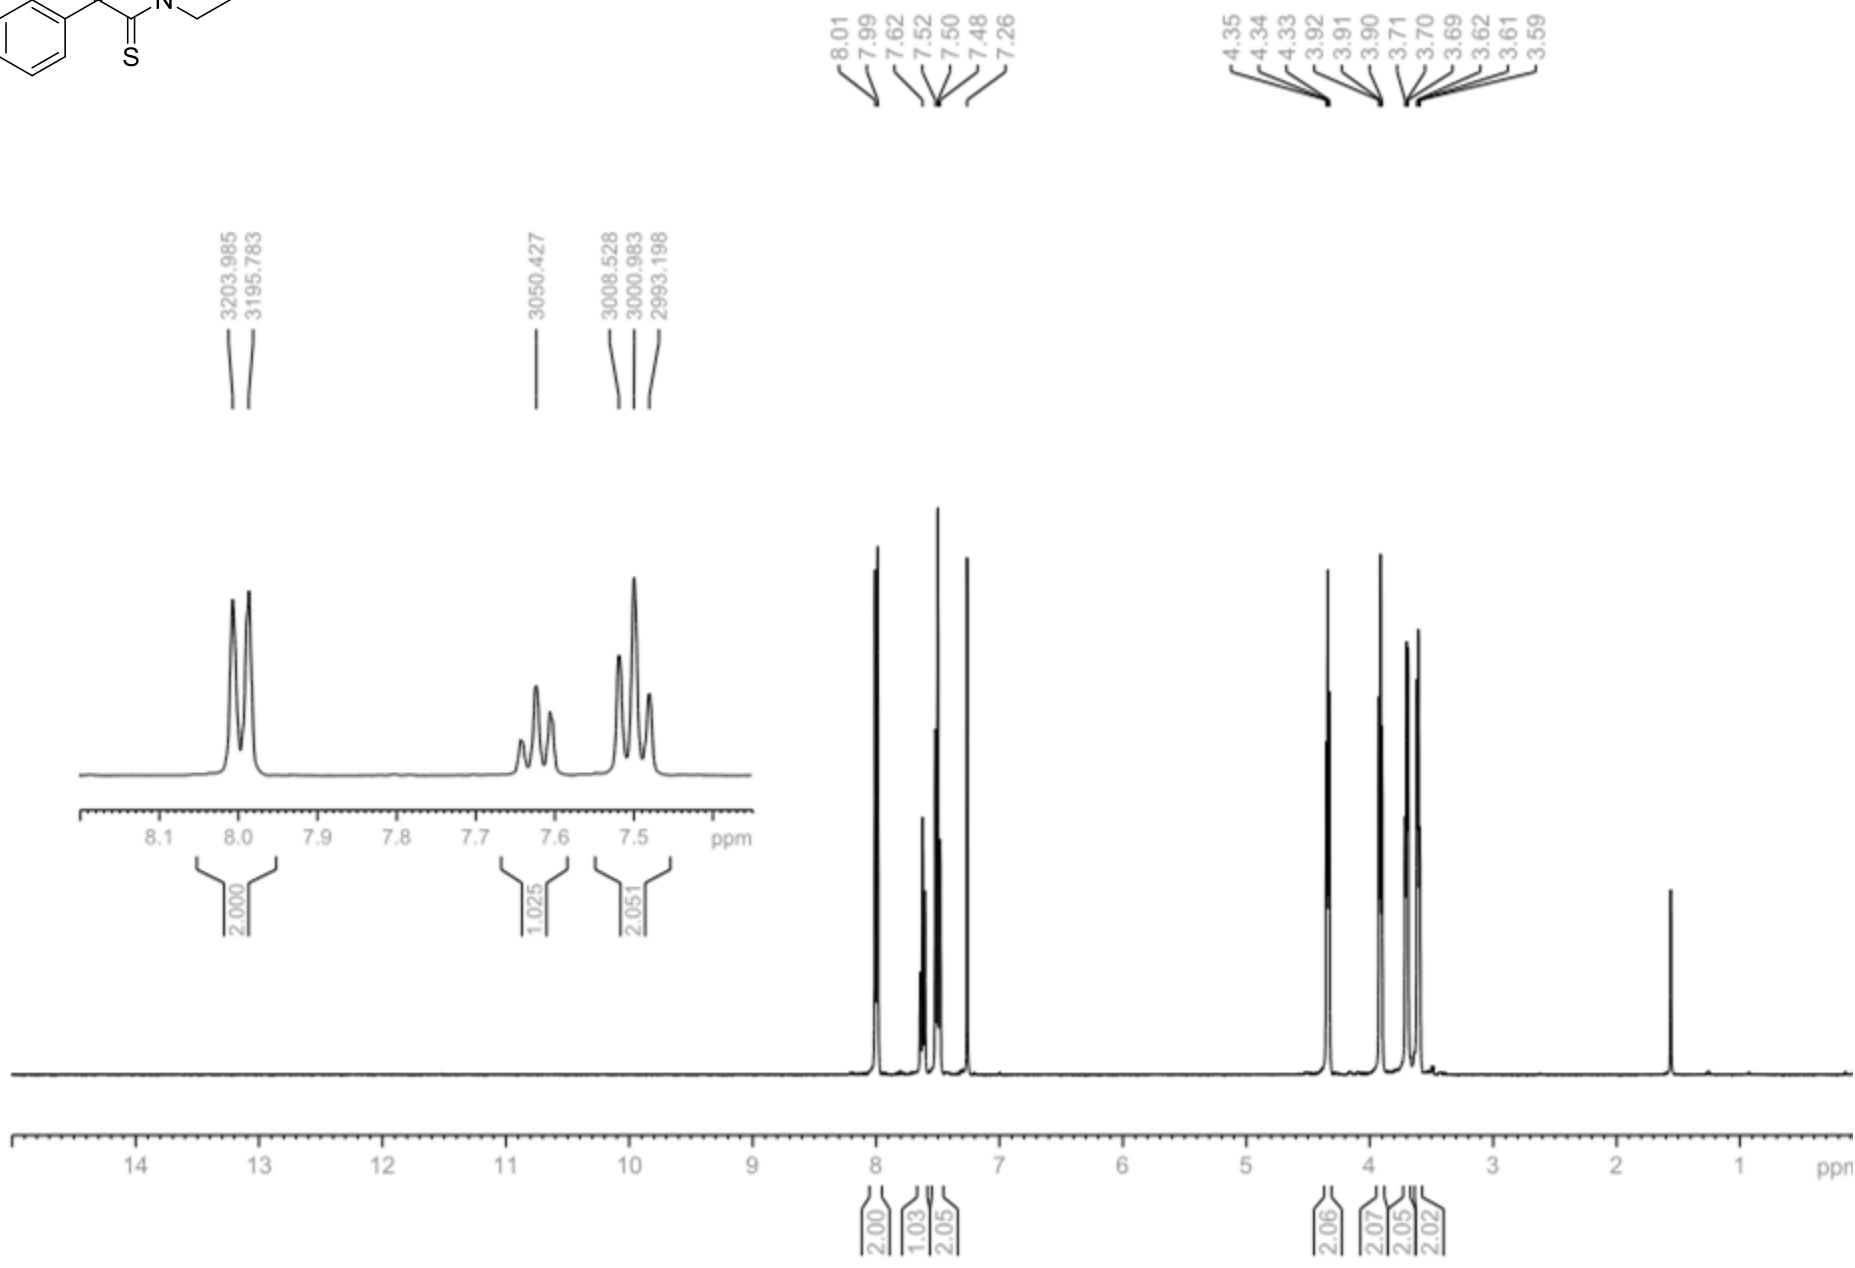

*1-Phenyl-2-morpholino-2-thioxoethanone* (**19**)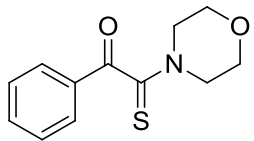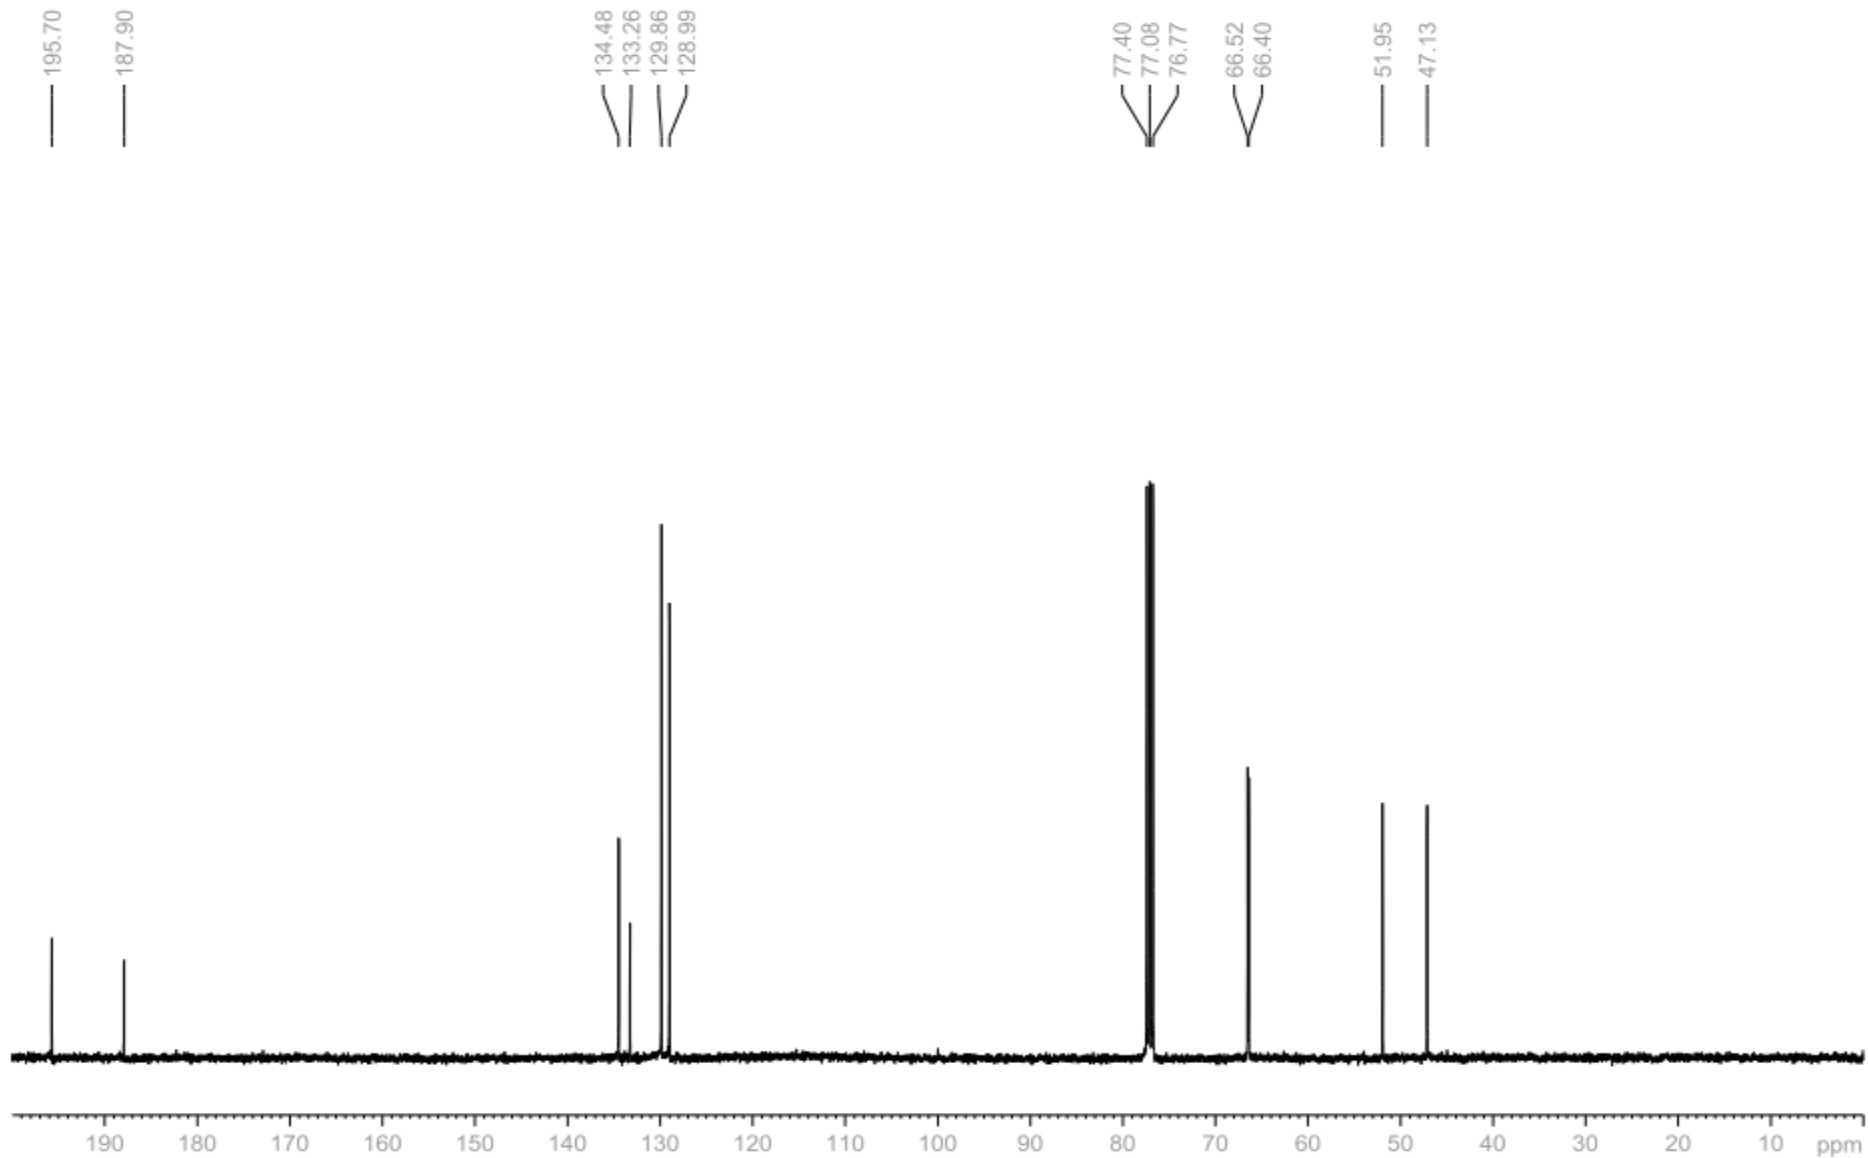

1-(2-Fluorophenyl)-2-morpholino-2-thioxoethanone (20)

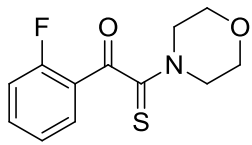

8.05  
8.04  
8.03  
8.02  
8.01  
8.00  
7.61  
7.59  
7.33  
7.33  
7.31  
7.31  
7.29  
7.29  
7.16  
7.15  
7.13  
7.13  
7.13  
7.13  
7.11  
7.10

4.27  
4.26  
3.90  
3.78  
3.71  
3.49  
3.48

1.58  
1.58

3220.028  
3218.200  
3212.389  
3210.570  
3204.799  
3202.969

3044.158  
3035.849  
2932.073  
2931.064  
2924.284  
2923.532  
2916.862  
2915.867  
2862.919  
2862.039  
2854.573  
2853.668

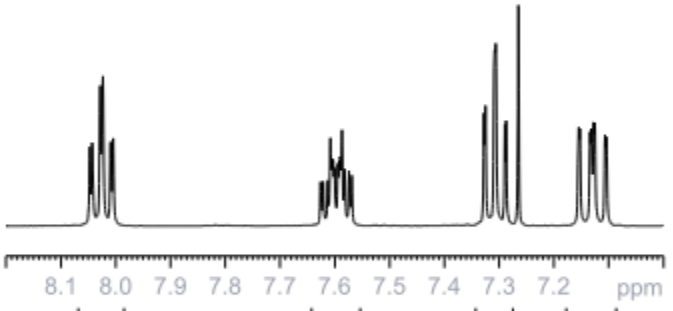

0.96  
0.97  
0.98  
0.97

2.00  
2.02  
2.01  
2.01

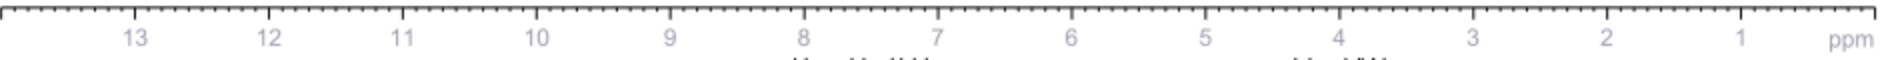

*1-(2-Fluorophenyl)-2-morpholino-2-thioxoethanone (20)*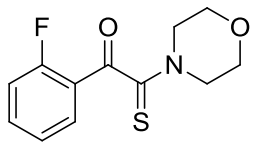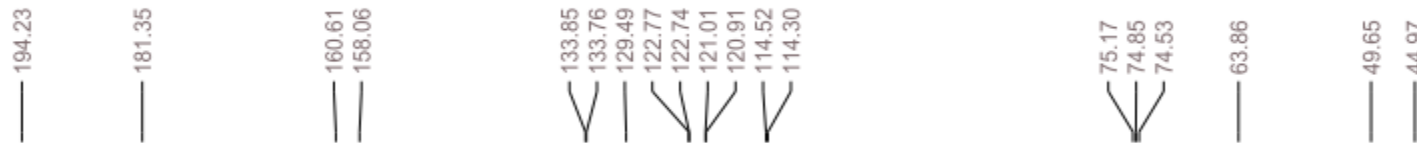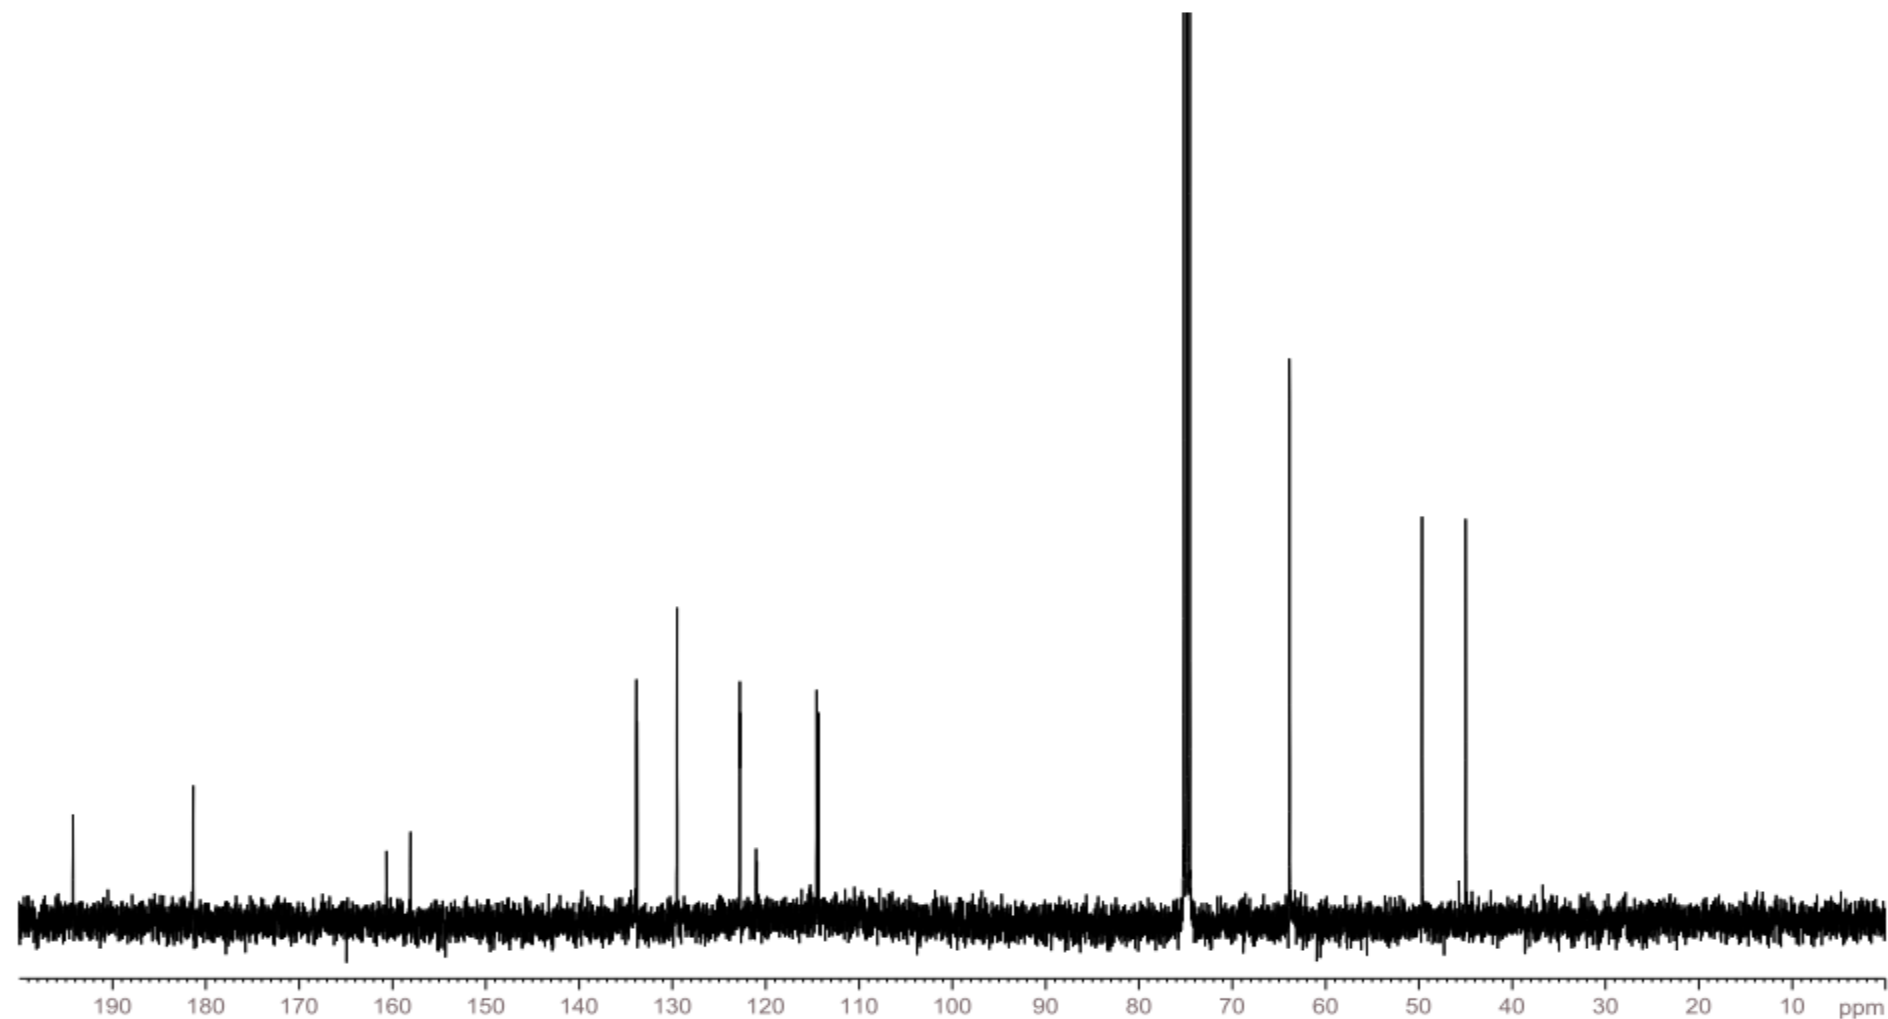

1-(3-Fluorophenyl)-2-morpholino-2-thioxoethanone (21)

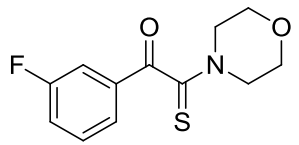

7.78  
7.78  
7.78  
7.76  
7.76  
7.76  
7.72  
7.71  
7.71  
7.71  
7.69  
7.69  
7.69  
7.68  
7.51  
7.50  
7.49  
7.47  
7.47  
7.46  
7.35  
7.34  
7.34  
7.34  
7.33  
7.32  
7.32  
7.32  
7.30  
7.30  
7.30  
4.34  
4.33  
4.32  
3.93  
3.91  
3.90  
3.72  
3.70  
3.62  
3.60

3106.461  
3105.269  
3104.216  
3087.774  
3086.025  
3085.262  
3083.676  
3078.738  
3077.030  
3076.235  
3074.631

3004.399  
2999.014  
2996.331  
2990.950  
2988.438  
2983.026

2939.345  
2938.545  
2936.759  
2935.916  
2931.165  
2930.327  
2928.534

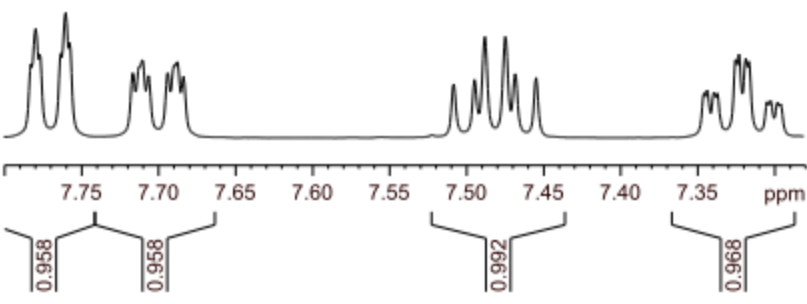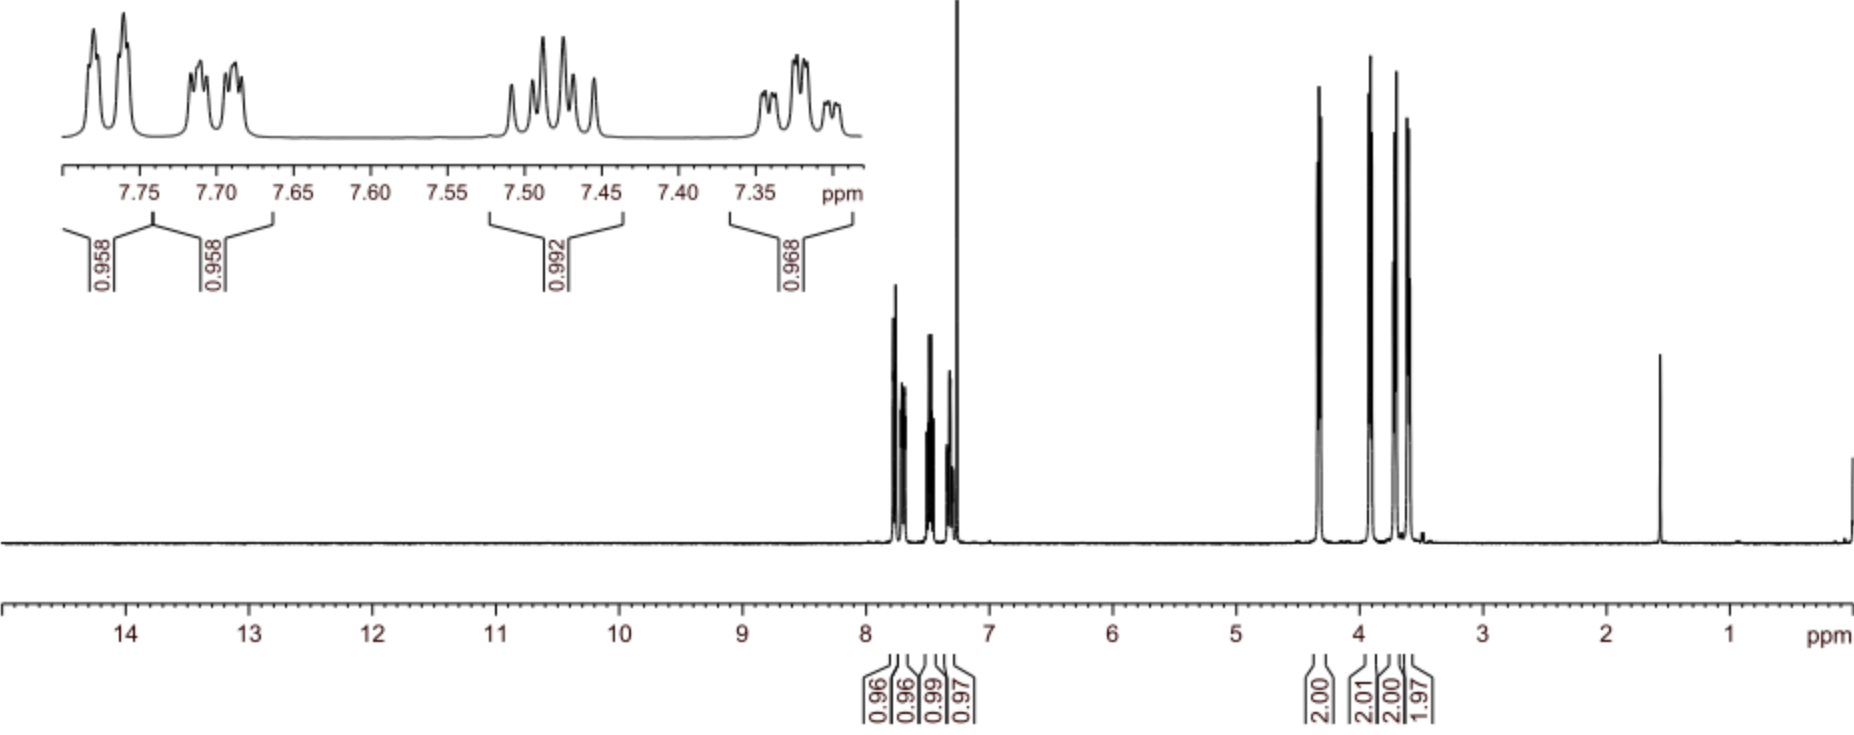

*1-(3-Fluorophenyl)-2-morpholino-2-thioxoethanone (21)*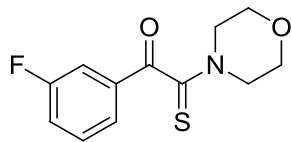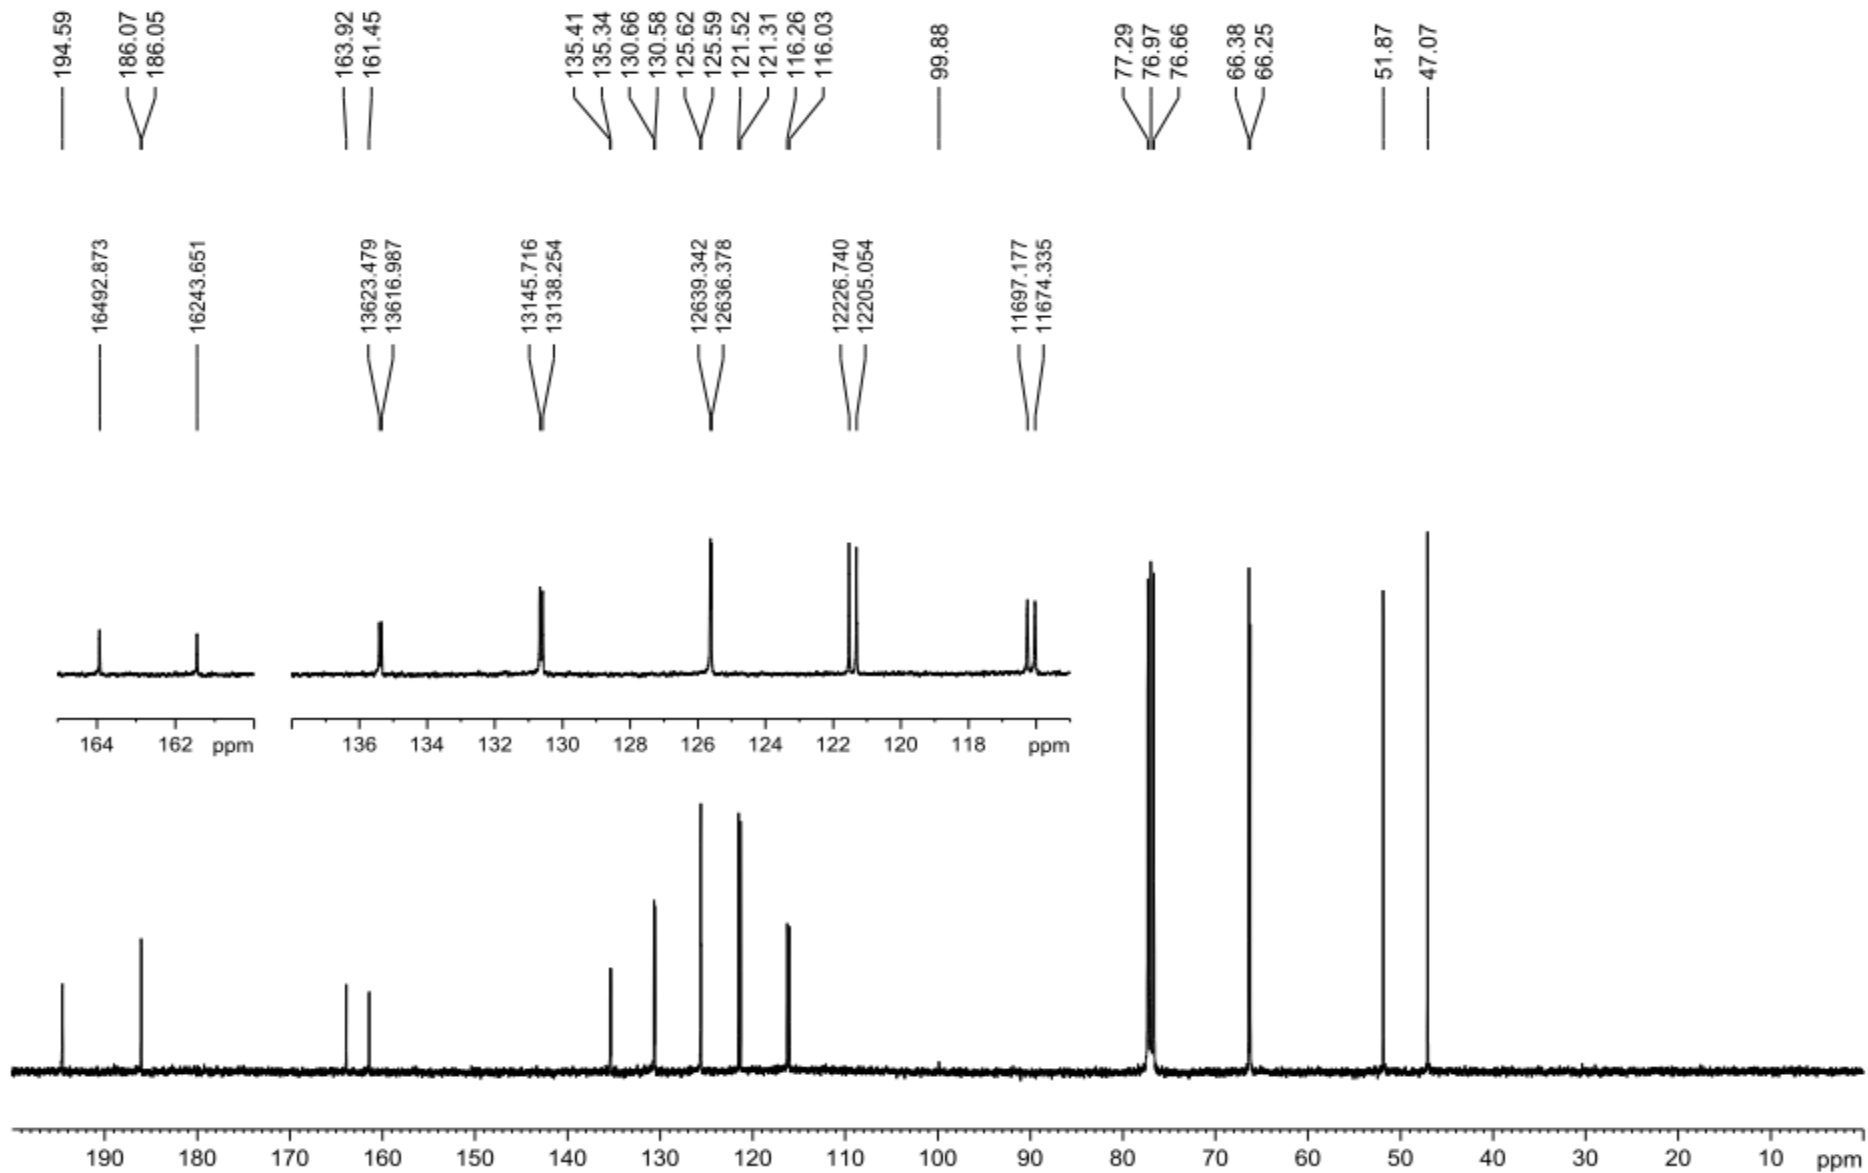

1-(4-Fluorophenyl)-2-morpholino-2-thioxoethanone (22)

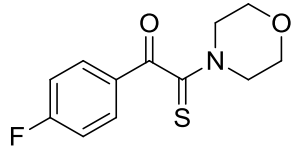

8.05  
8.05  
8.04  
8.03  
8.03  
8.02  
8.02  
7.27  
7.19  
7.19  
7.17  
7.16  
7.15

4.34  
4.33  
4.31  
3.92  
3.91  
3.89  
3.72  
3.71  
3.69  
3.61  
3.60  
3.59

3221.670  
3219.555  
3216.328  
3214.544  
3212.772  
3209.558  
3207.435

2910.181  
2878.317  
2876.292  
2869.745  
2863.139  
2861.127

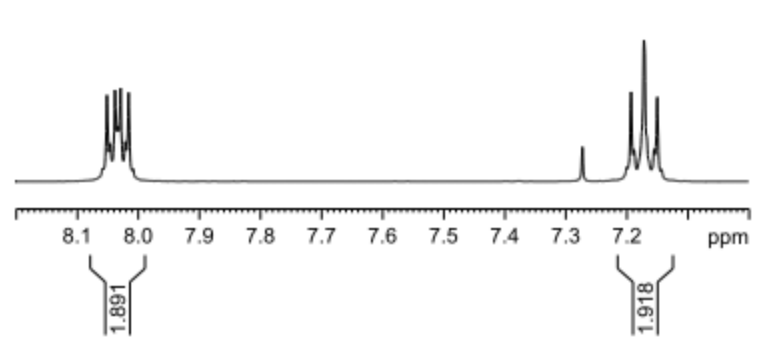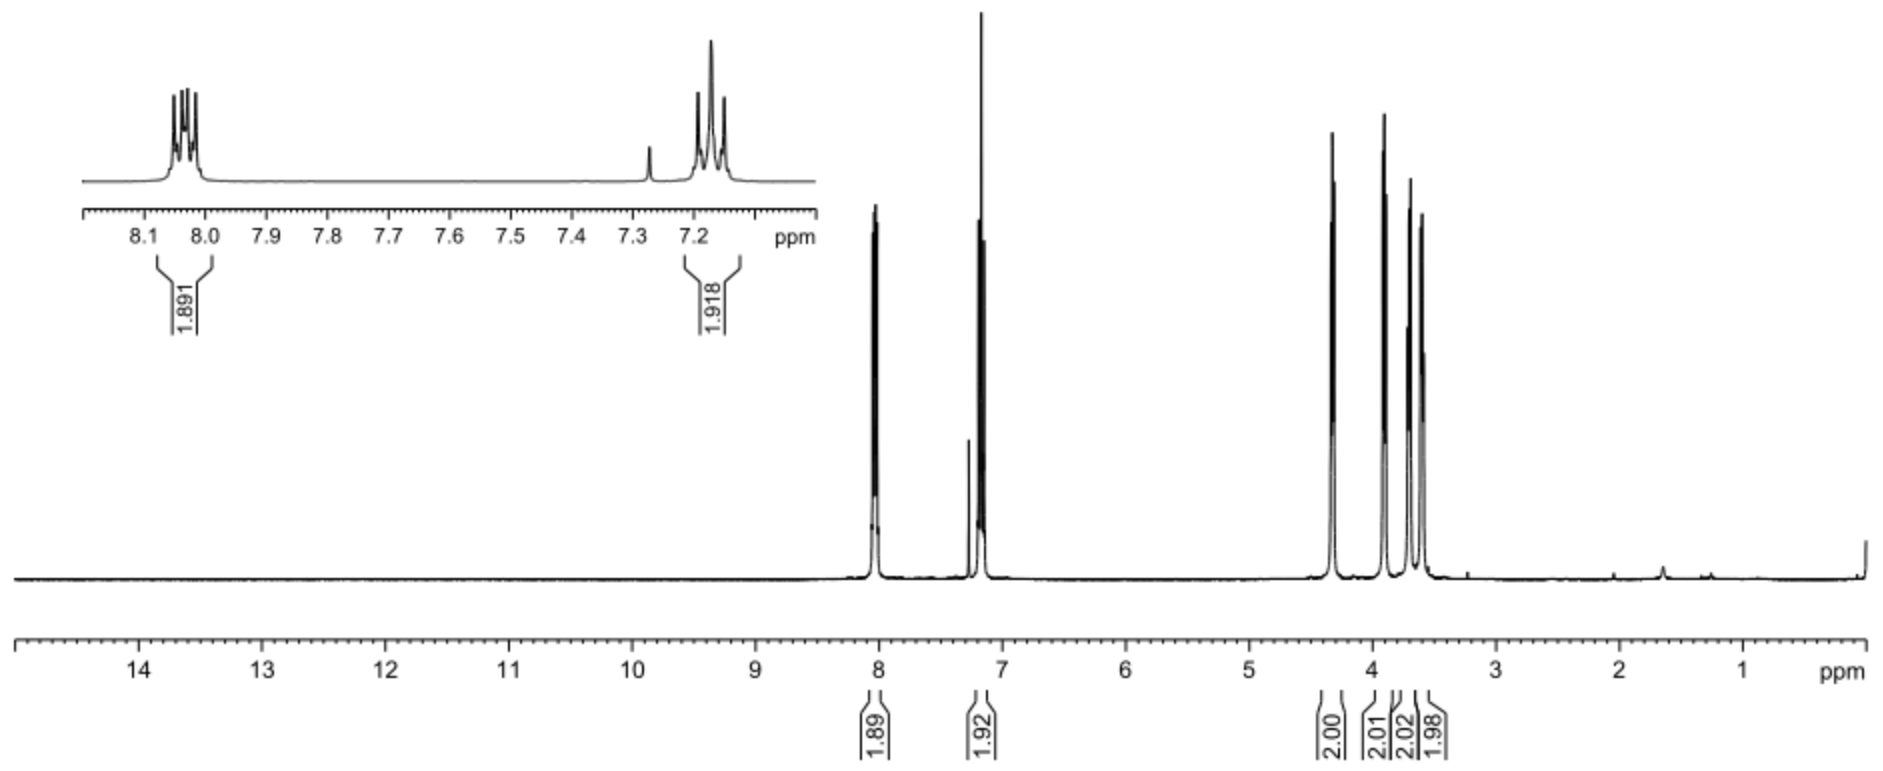



*1-(4-Fluorophenyl)-2-morpholino-2-thioxoethanone (22)*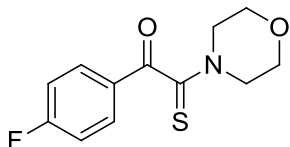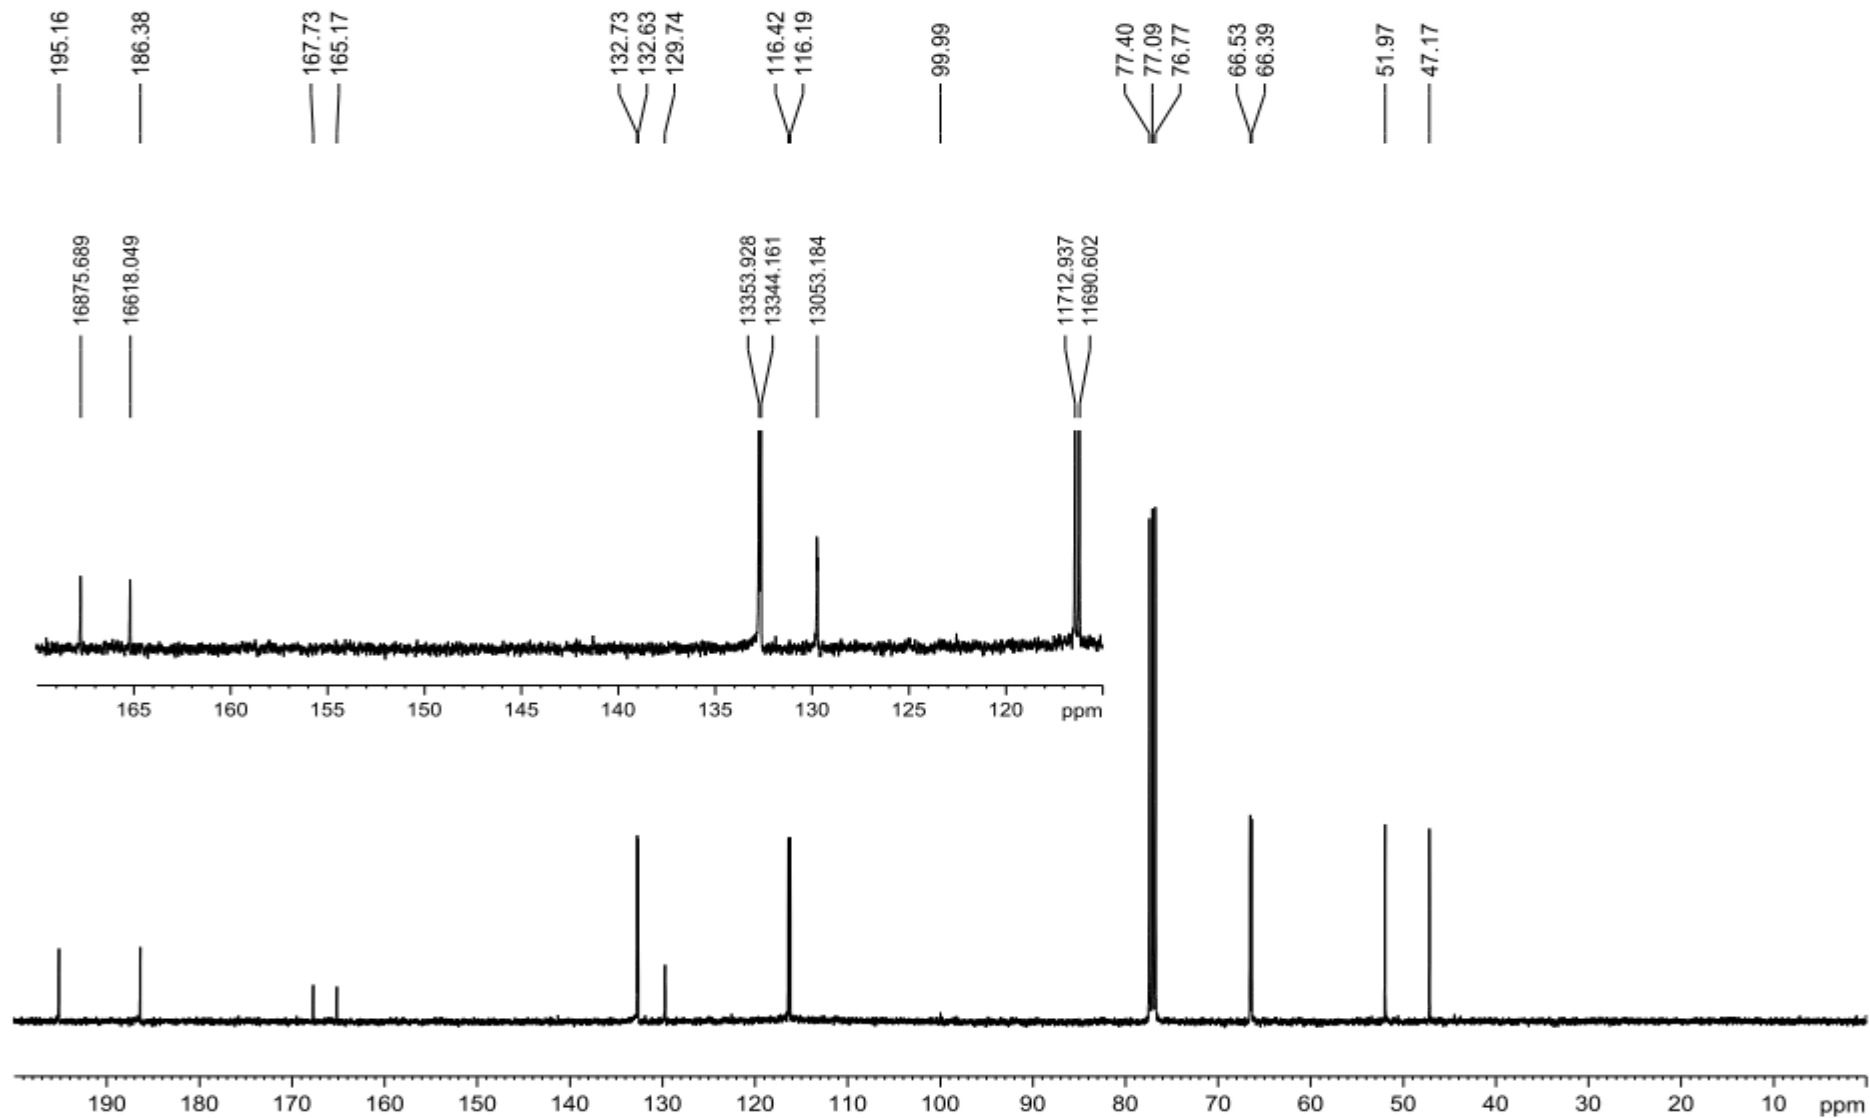

1-(2-Chlorophenyl)-2-morpholino-2-thioxoethanone (23)

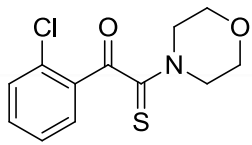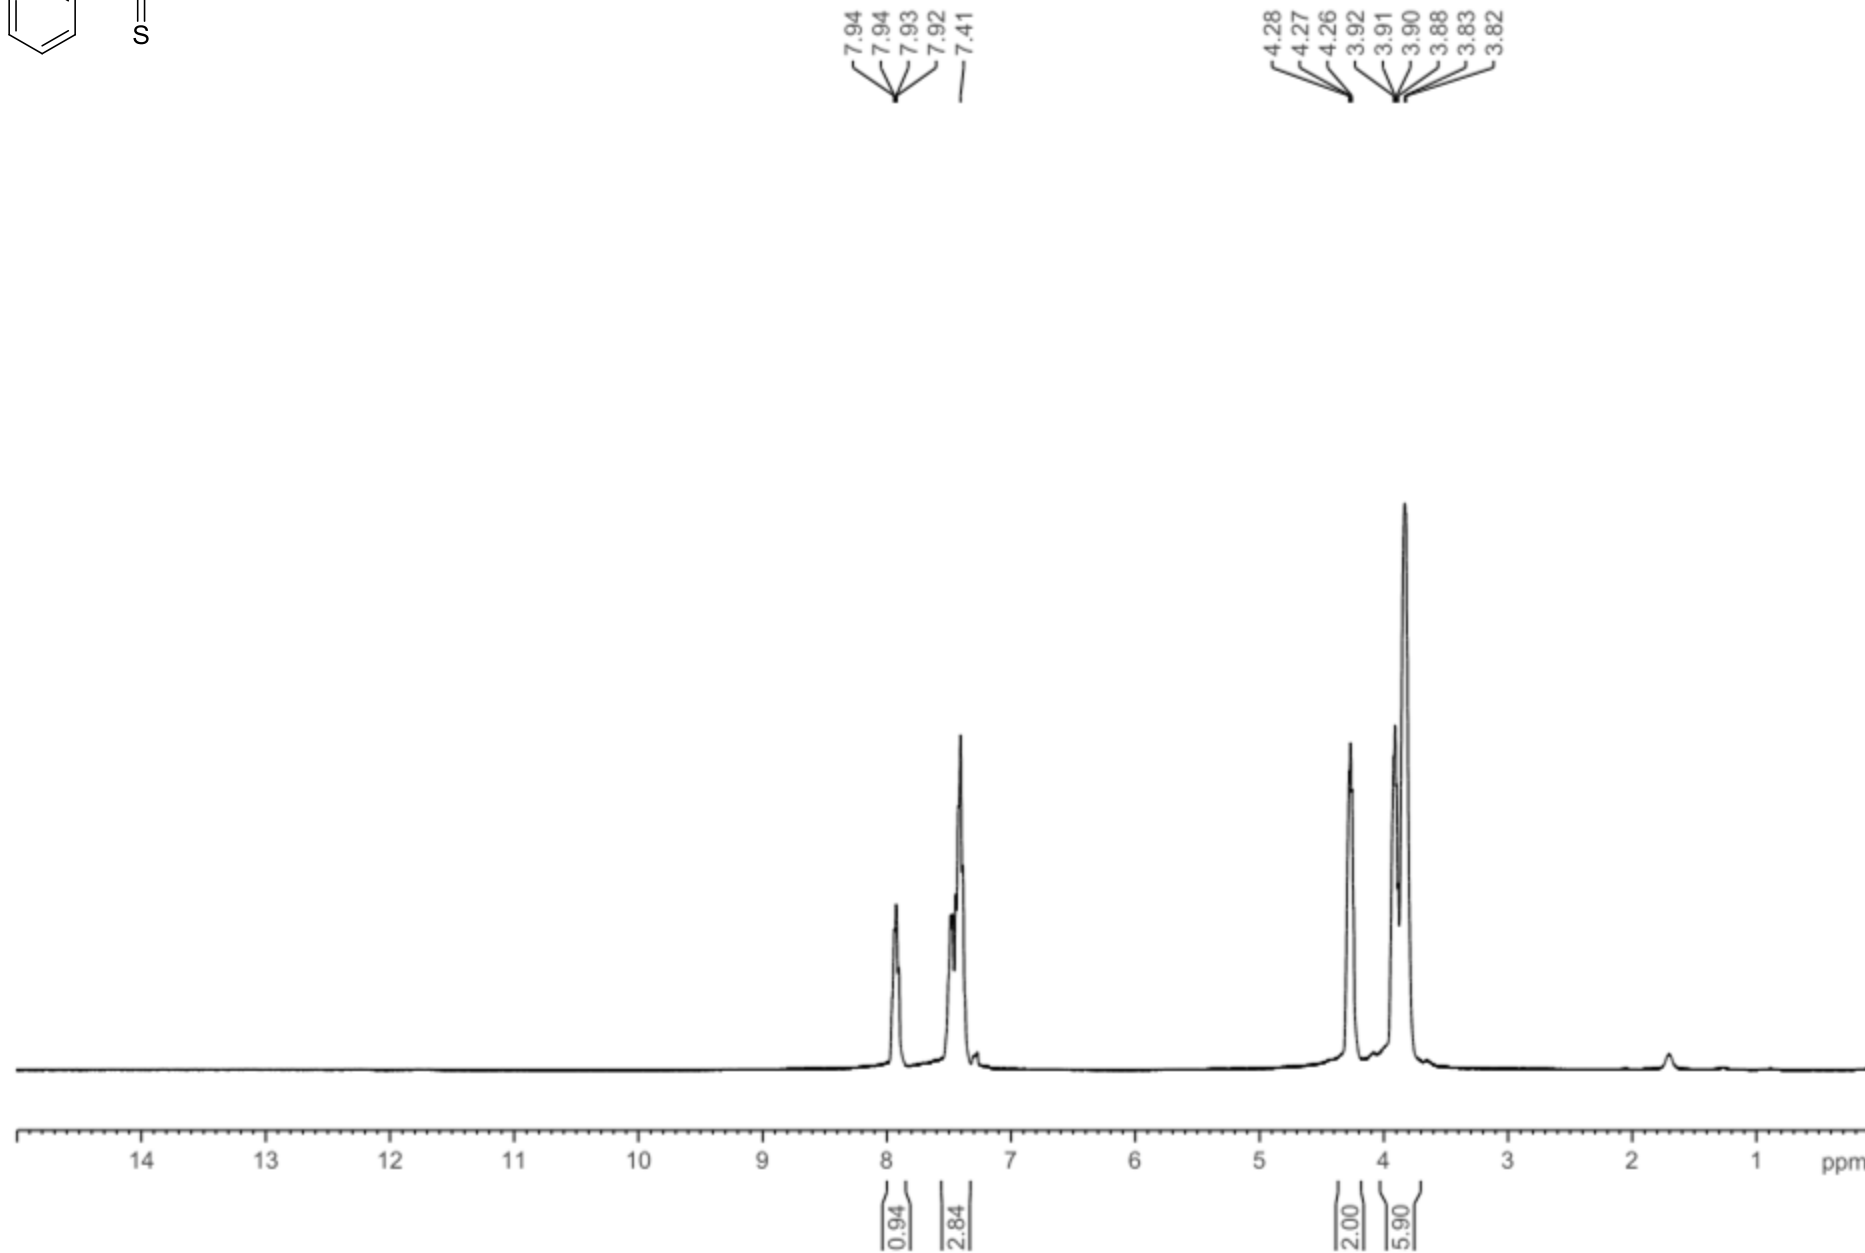

*1-(2-Chlorophenyl)-2-morpholino-2-thioxoethanone (23)*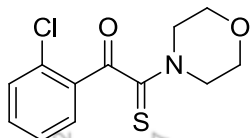

195.72  
185.07

134.58  
133.80  
132.69  
132.41  
131.16  
130.73  
127.29

77.47  
77.16  
76.84

66.06  
66.01

52.15  
47.70

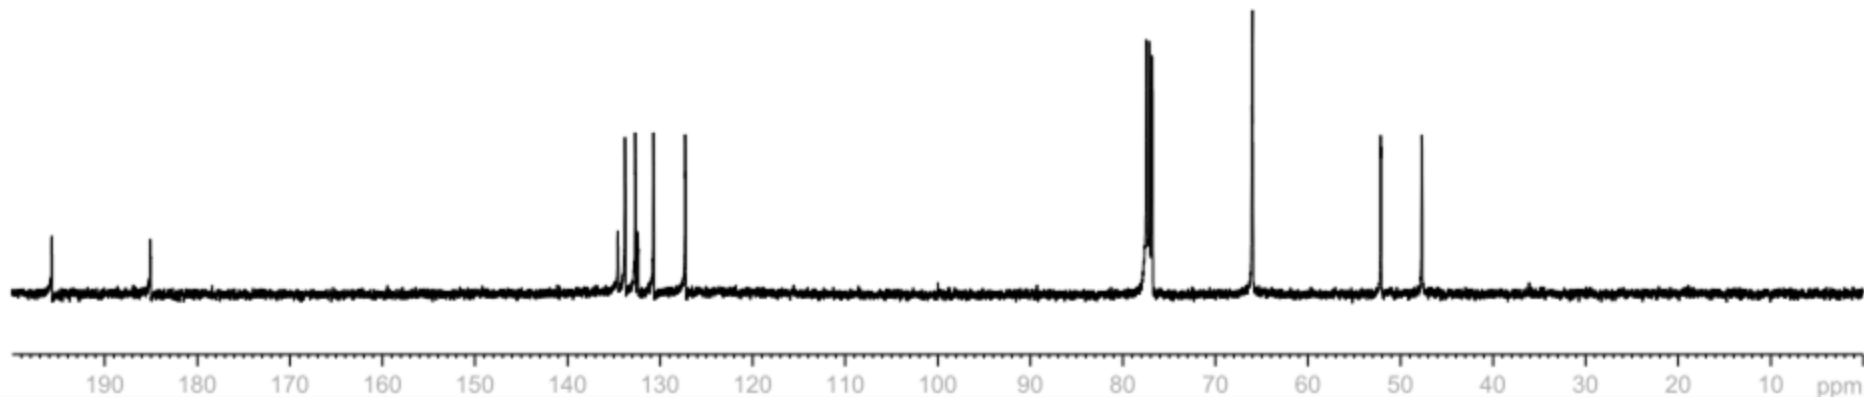

*1-(3-Chlorophenyl)-2-morpholino-2-thioxoethanone (24)*

**<sup>1</sup>H NMR**

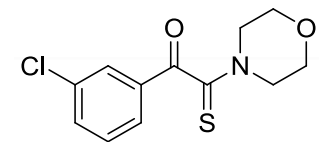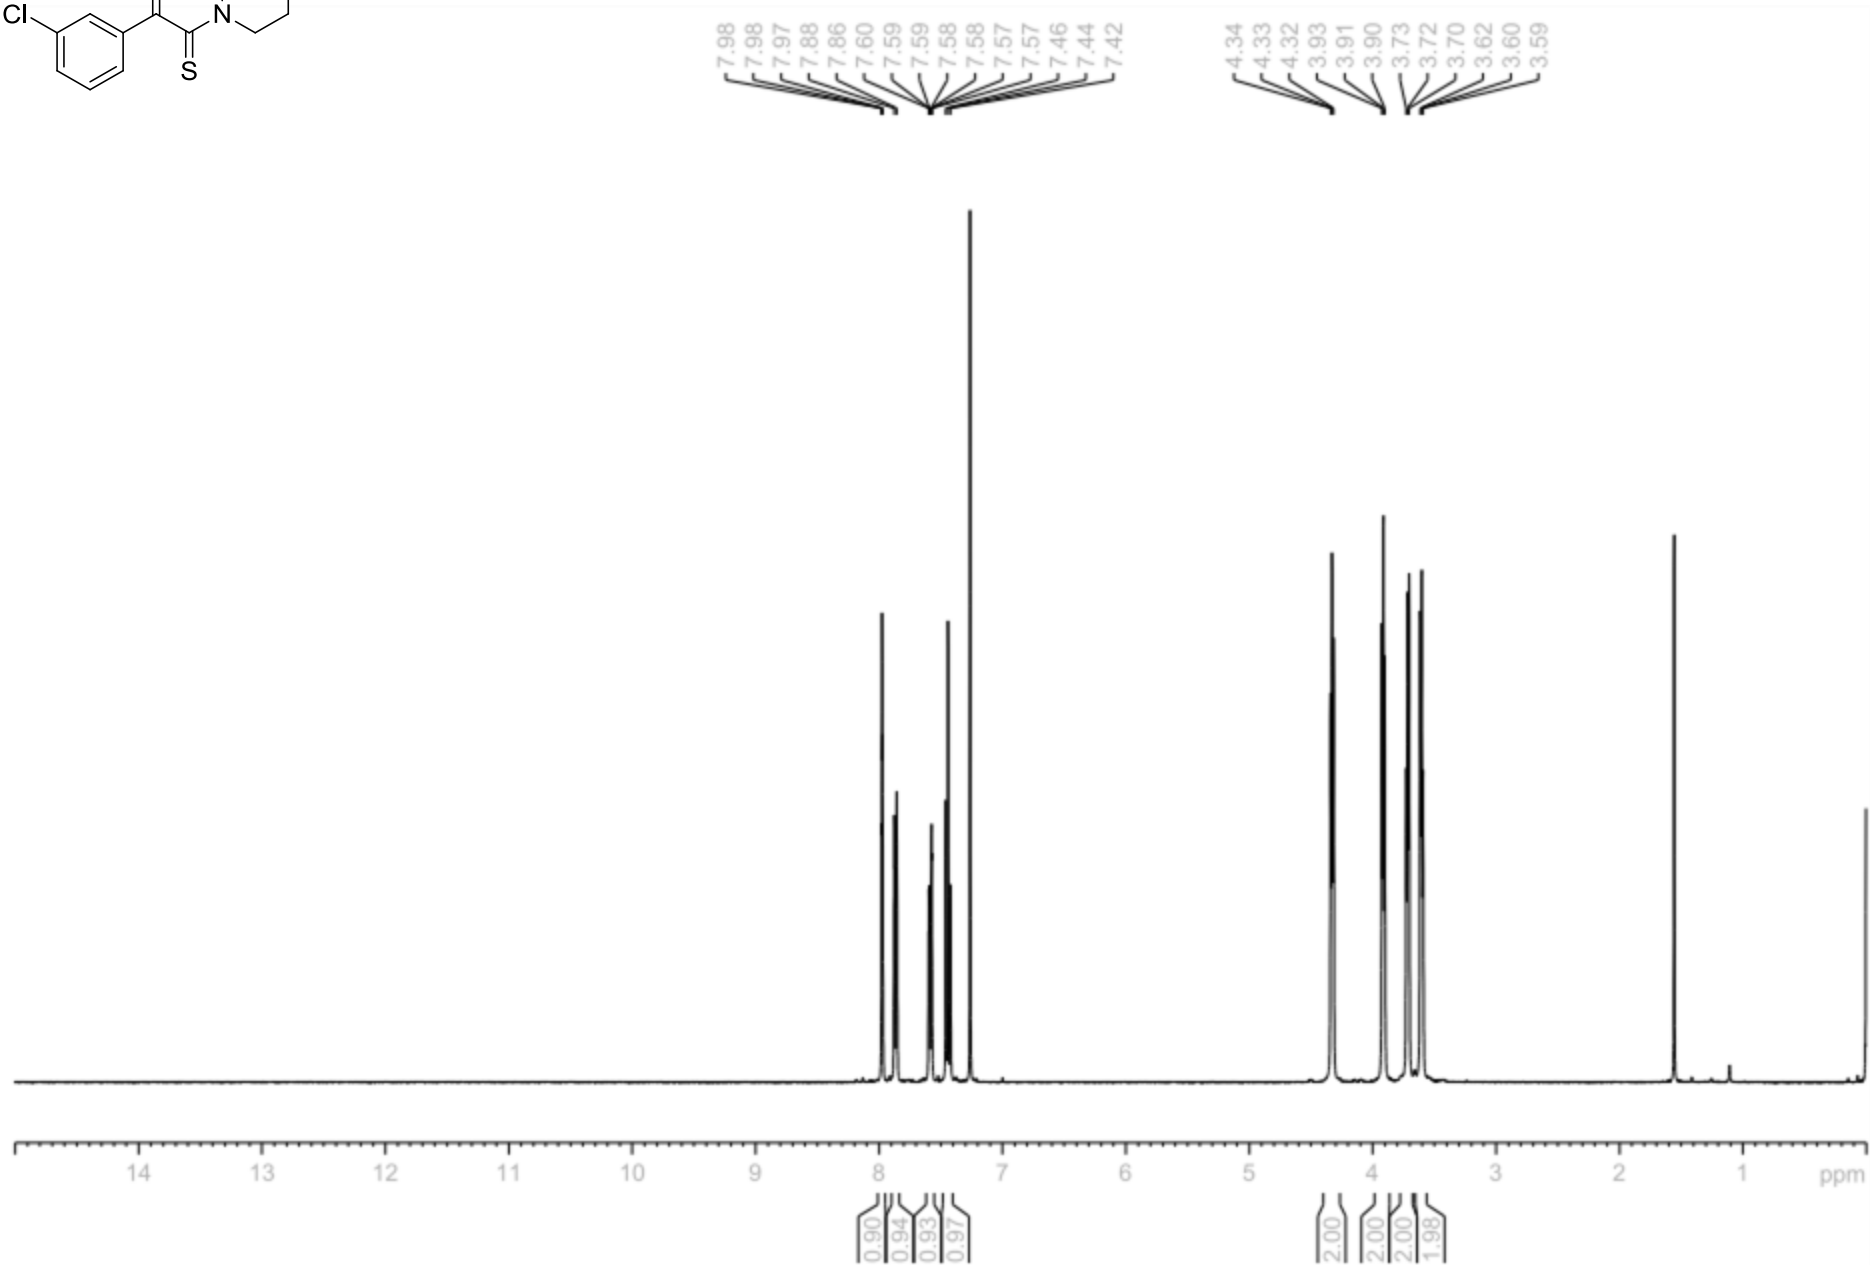

*1-(3-Chlorophenyl)-2-morpholino-2-thioxoethanone (24)*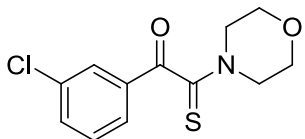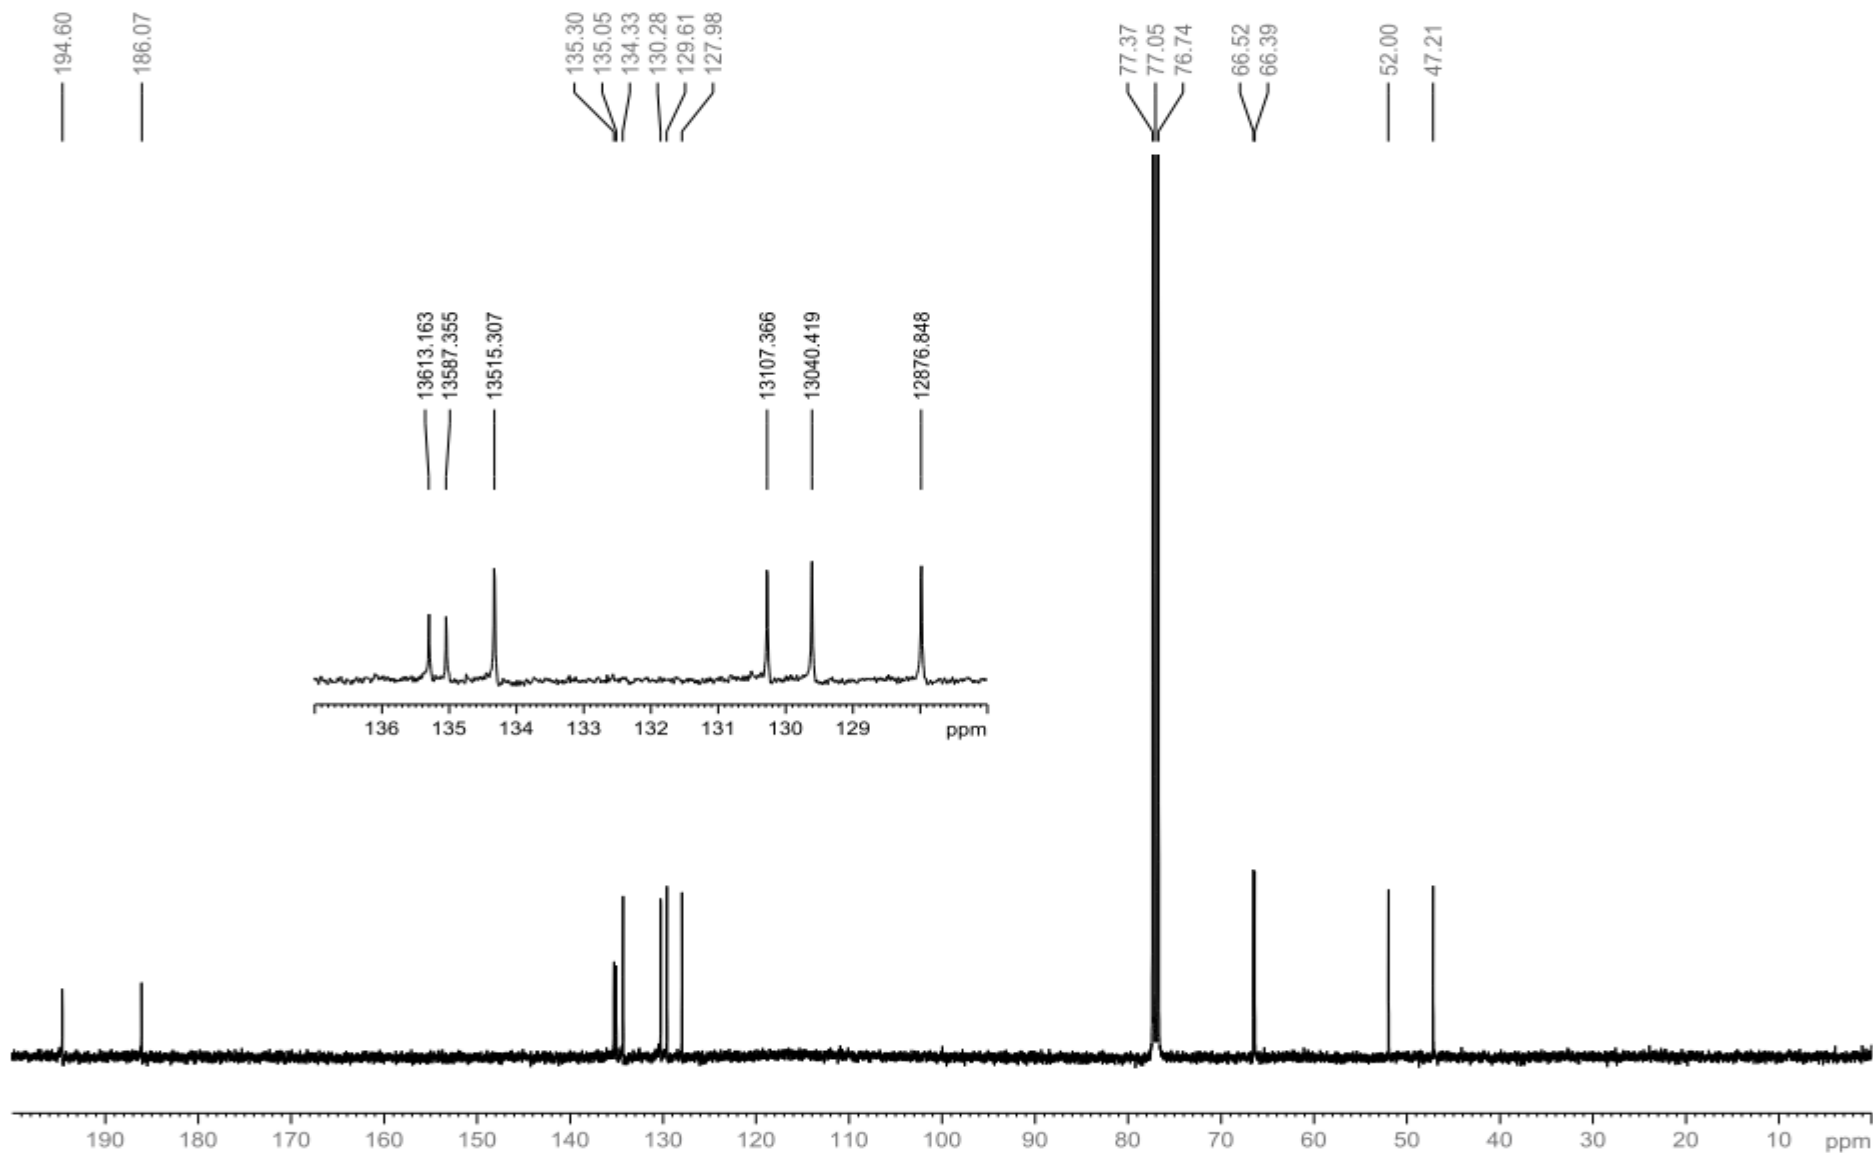

1-(4-Chlorophenyl)-2-morpholino-2-thioxoethanone (25)

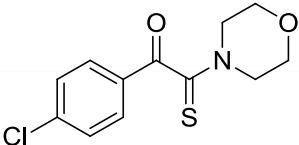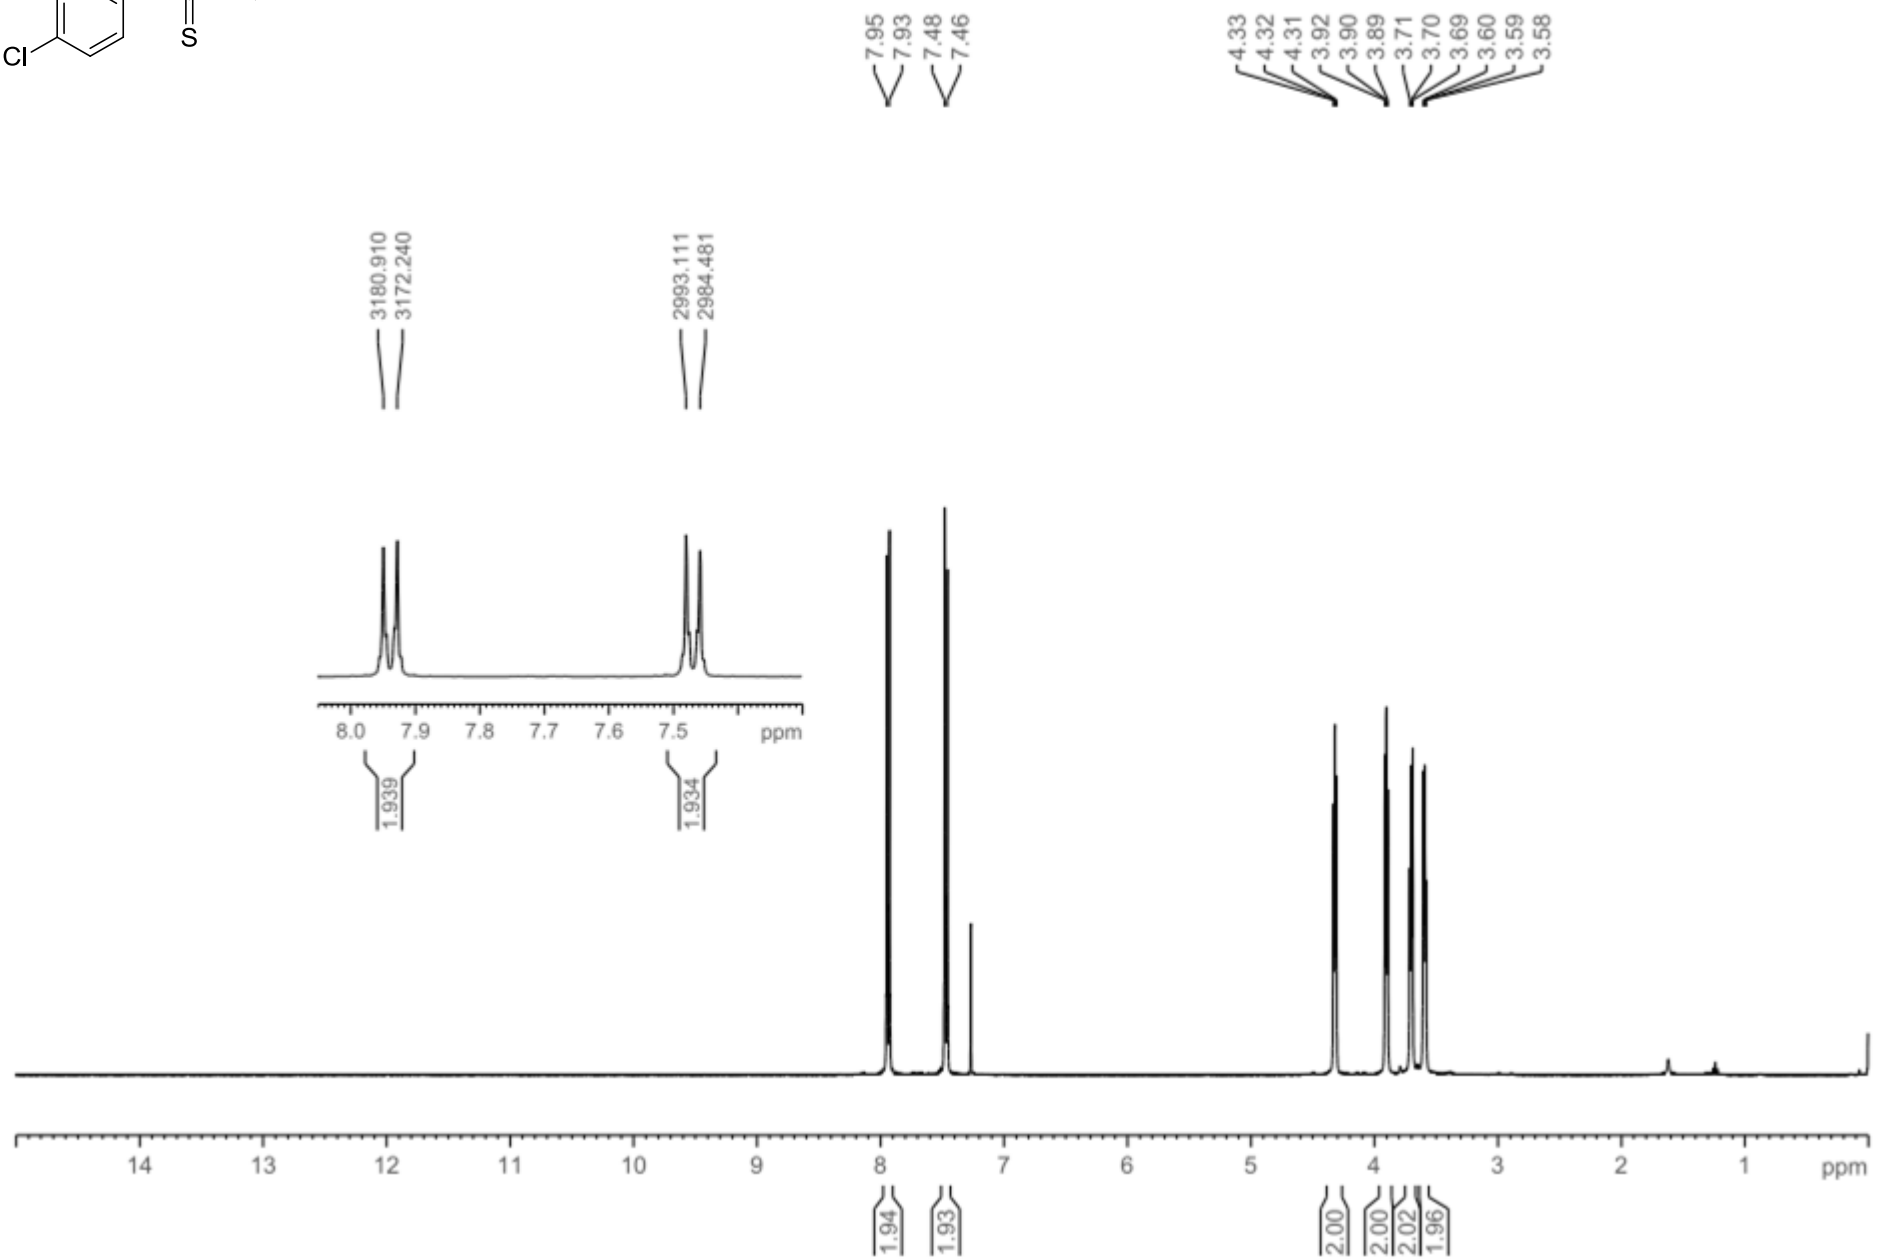

*1-(4-Chlorophenyl)-2-morpholino-2-thioxoethanone (25)*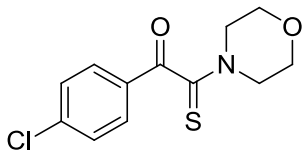

194.94

186.45

141.06

131.74

131.22

129.36

77.38

77.06

76.75

66.53

66.39

51.97

47.18

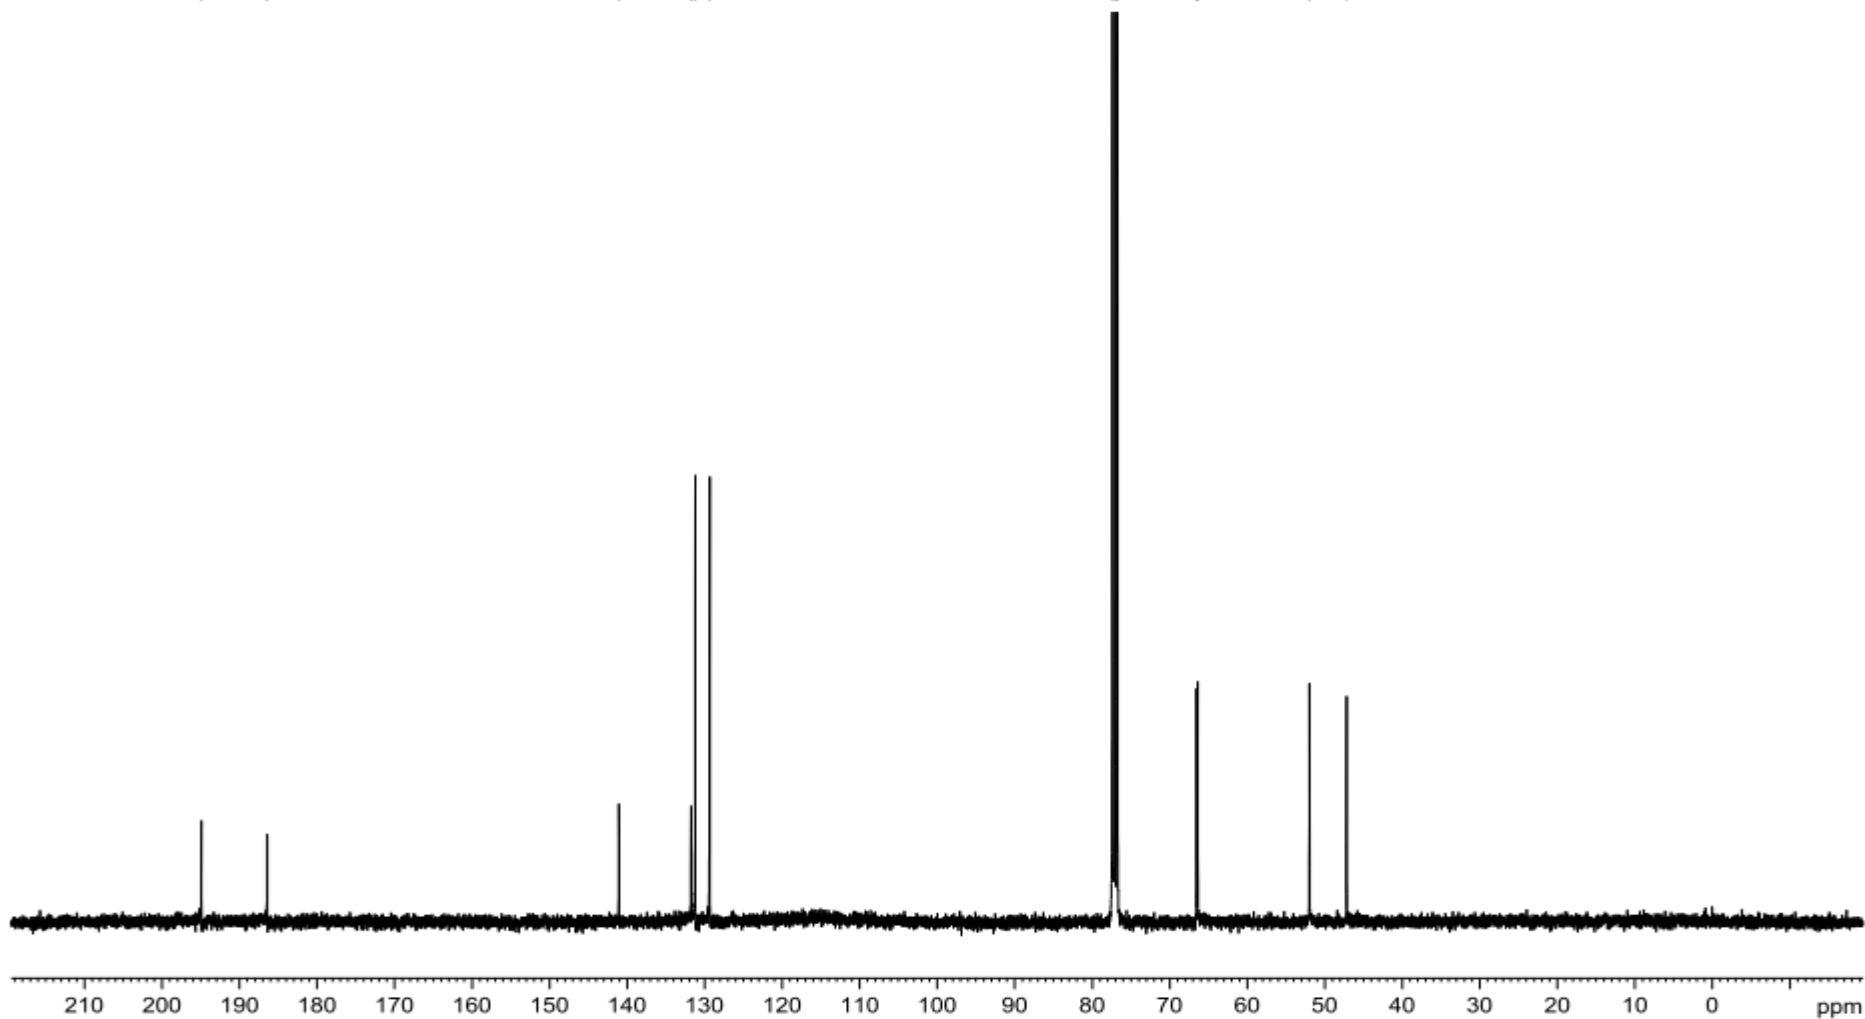

1-(2-Bromophenyl)-2-morpholino-2-thioxoethanone (26)

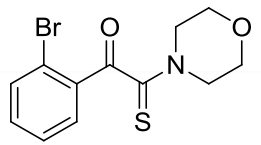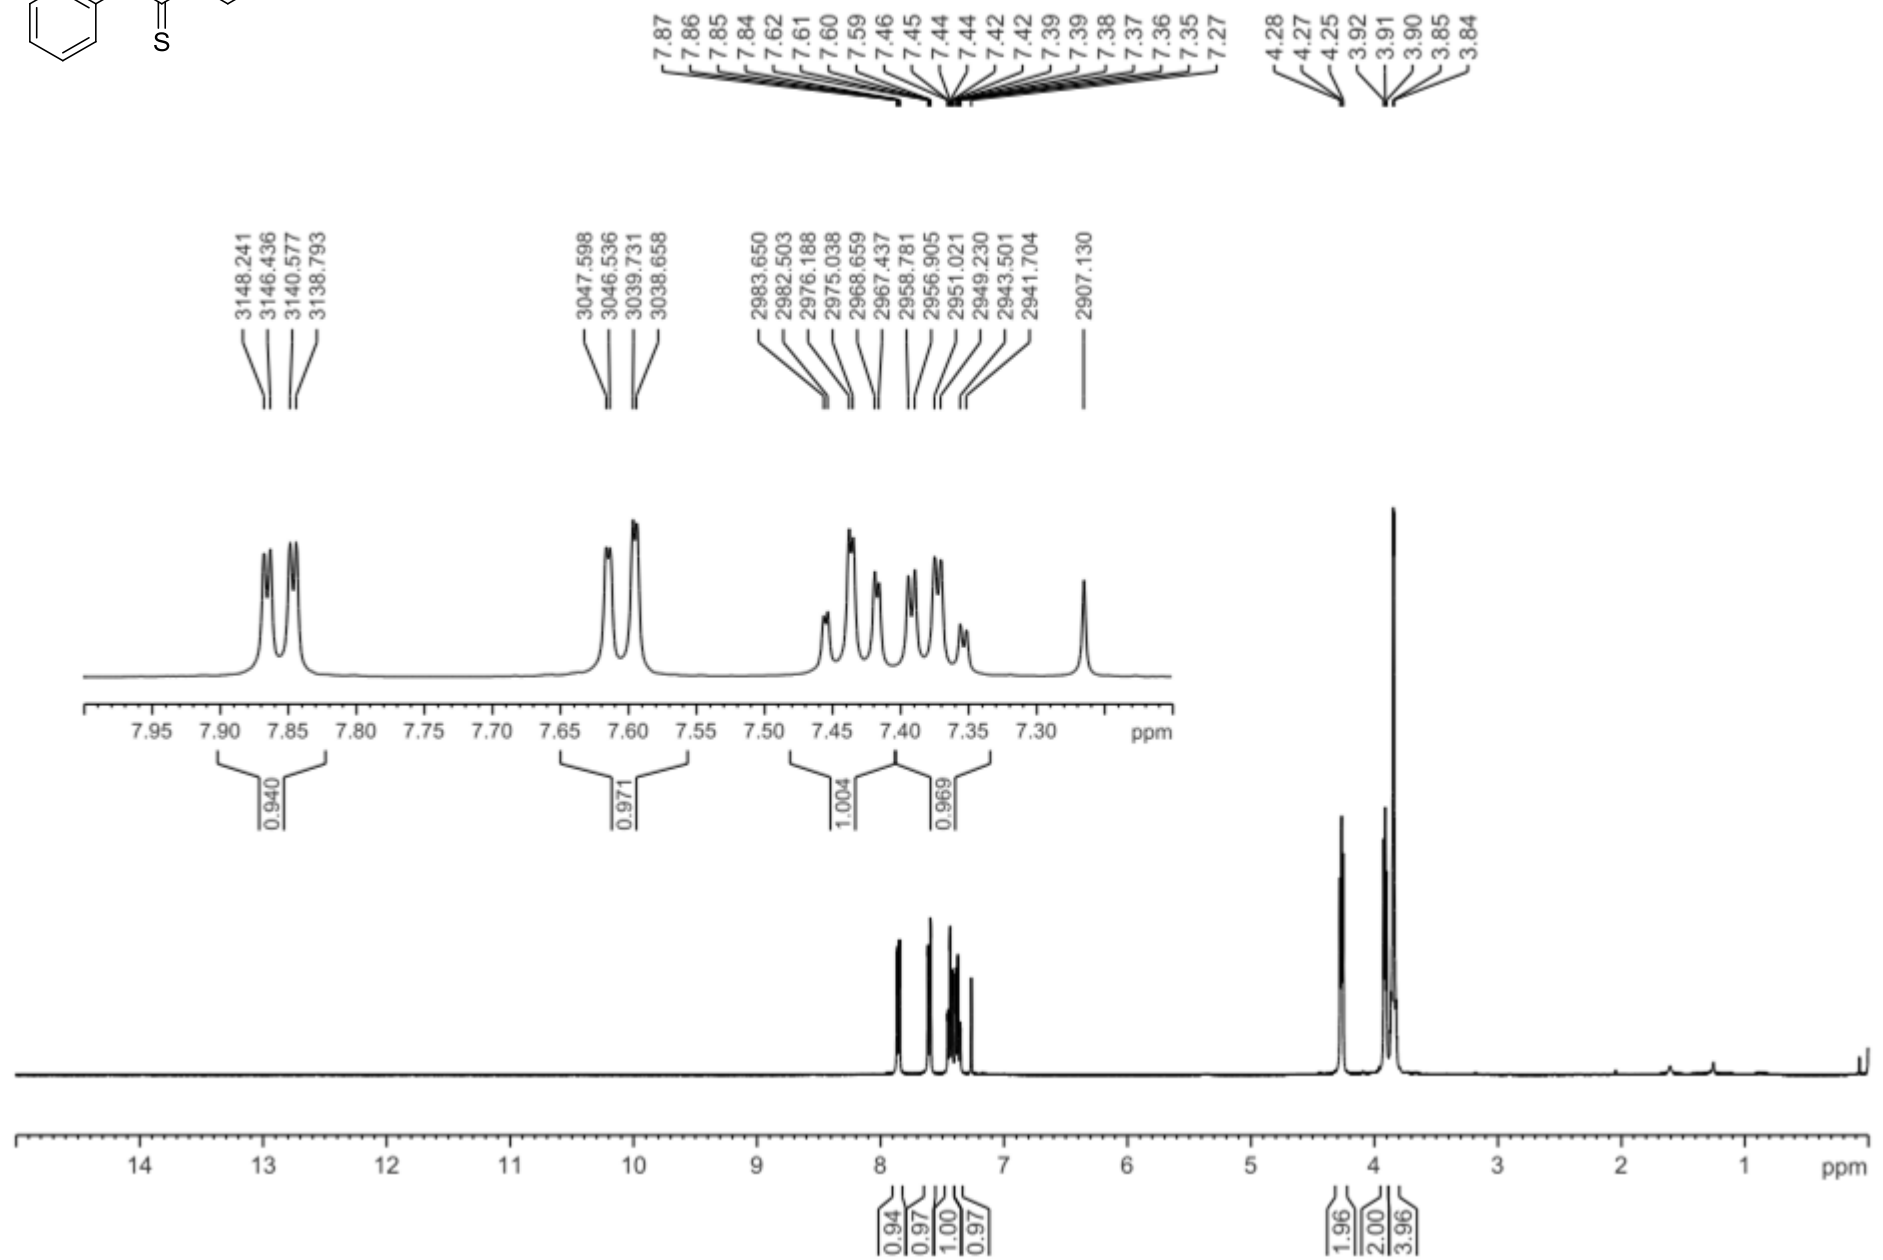



*1-(2-Bromophenyl)-2-morpholino-2-thioxoethanone (26)*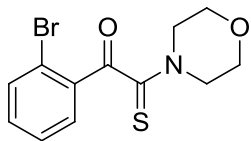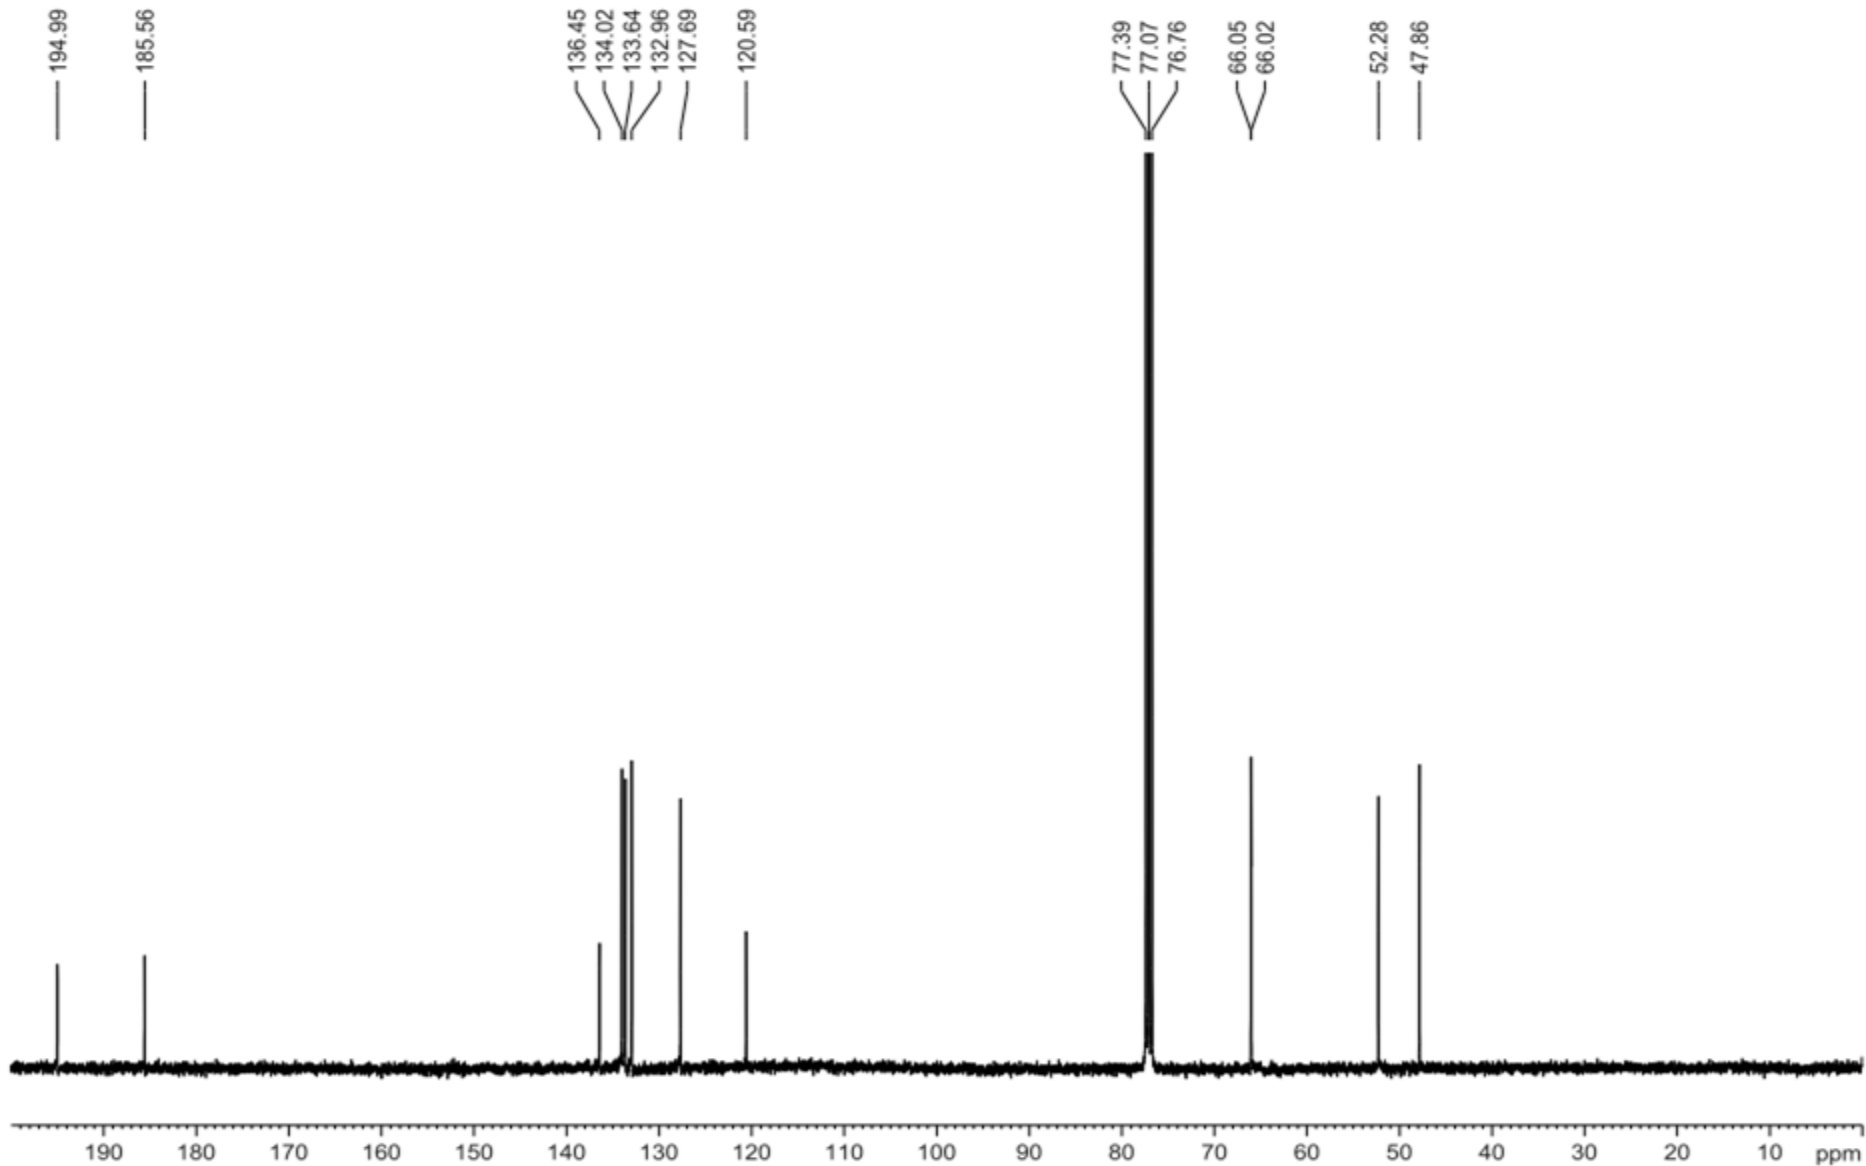

1-(3-Bromophenyl)-2-morpholino-2-thioxoethanone (27)

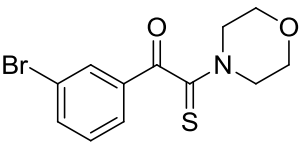

8.14  
8.13  
7.92  
7.90  
7.75  
7.73  
7.40  
7.38  
7.37  
7.36  
7.36  
7.26

4.34  
4.33  
3.93  
3.92  
3.91  
3.73  
3.72  
3.61  
3.61

3255.817  
3254.178

3170.208  
3162.503

3102.218  
3094.267

2959.545  
2951.698  
2947.408  
2945.485

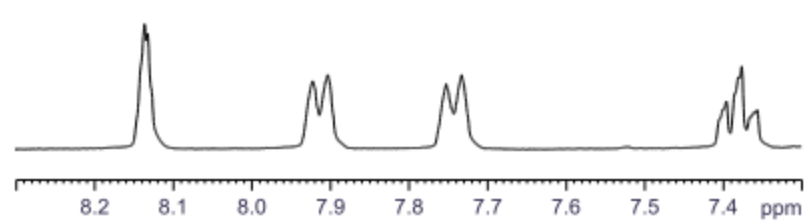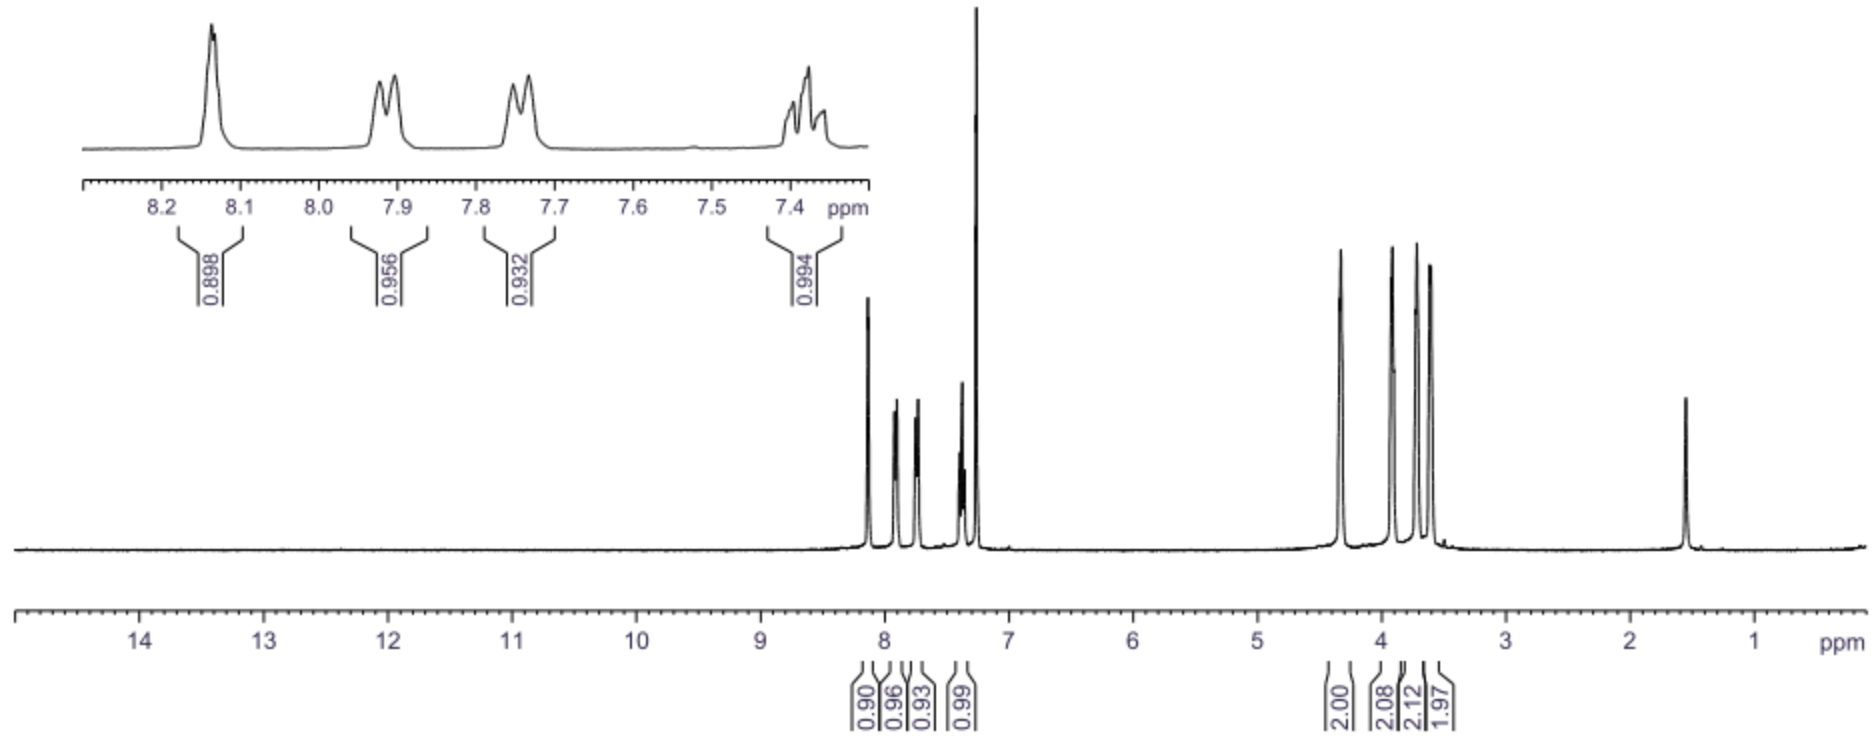

*1-(3-Bromophenyl)-2-morpholino-2-thioxoethanone (27)*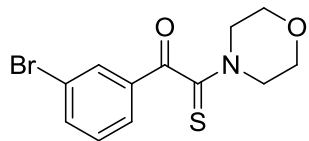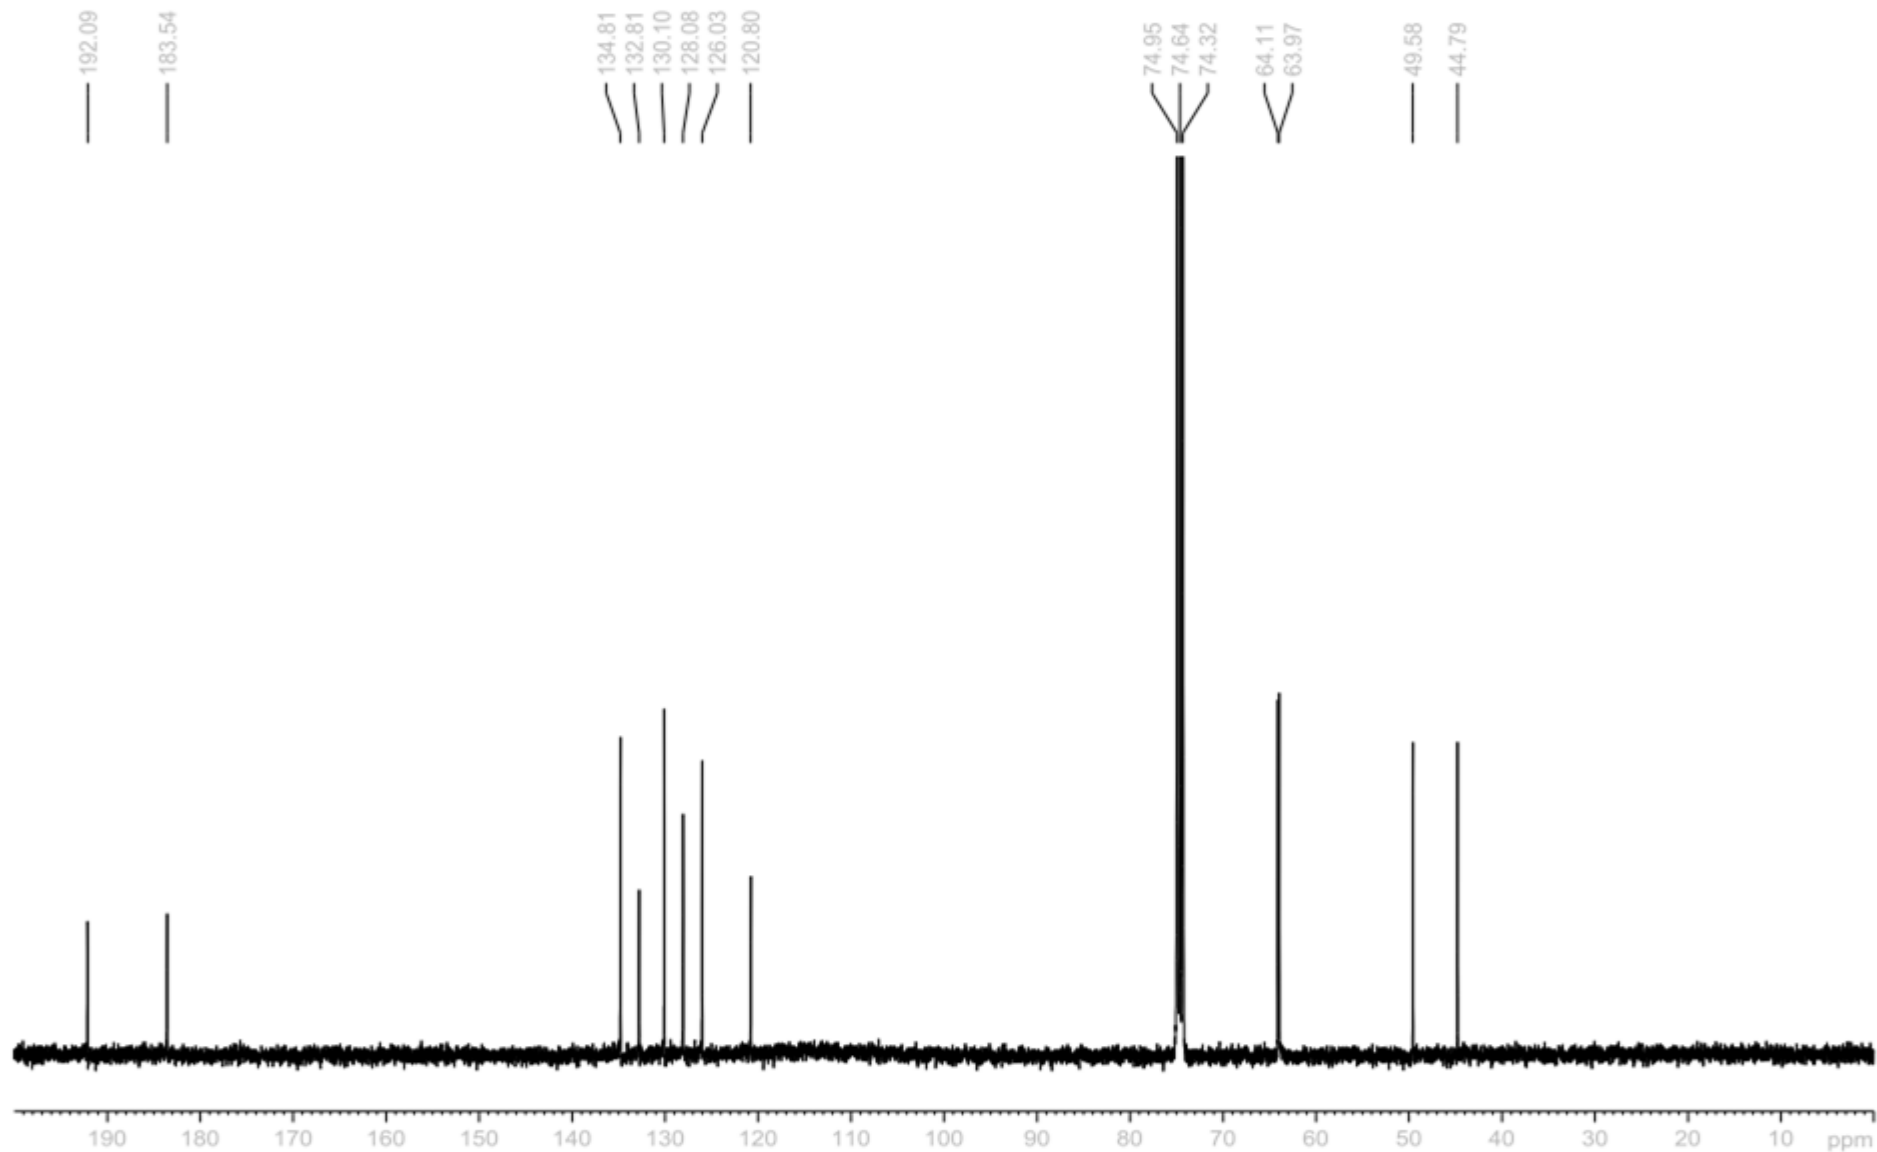

1-(4-Bromophenyl)-2-morpholino-2-thioxoethanone (28)

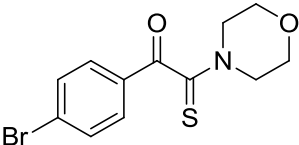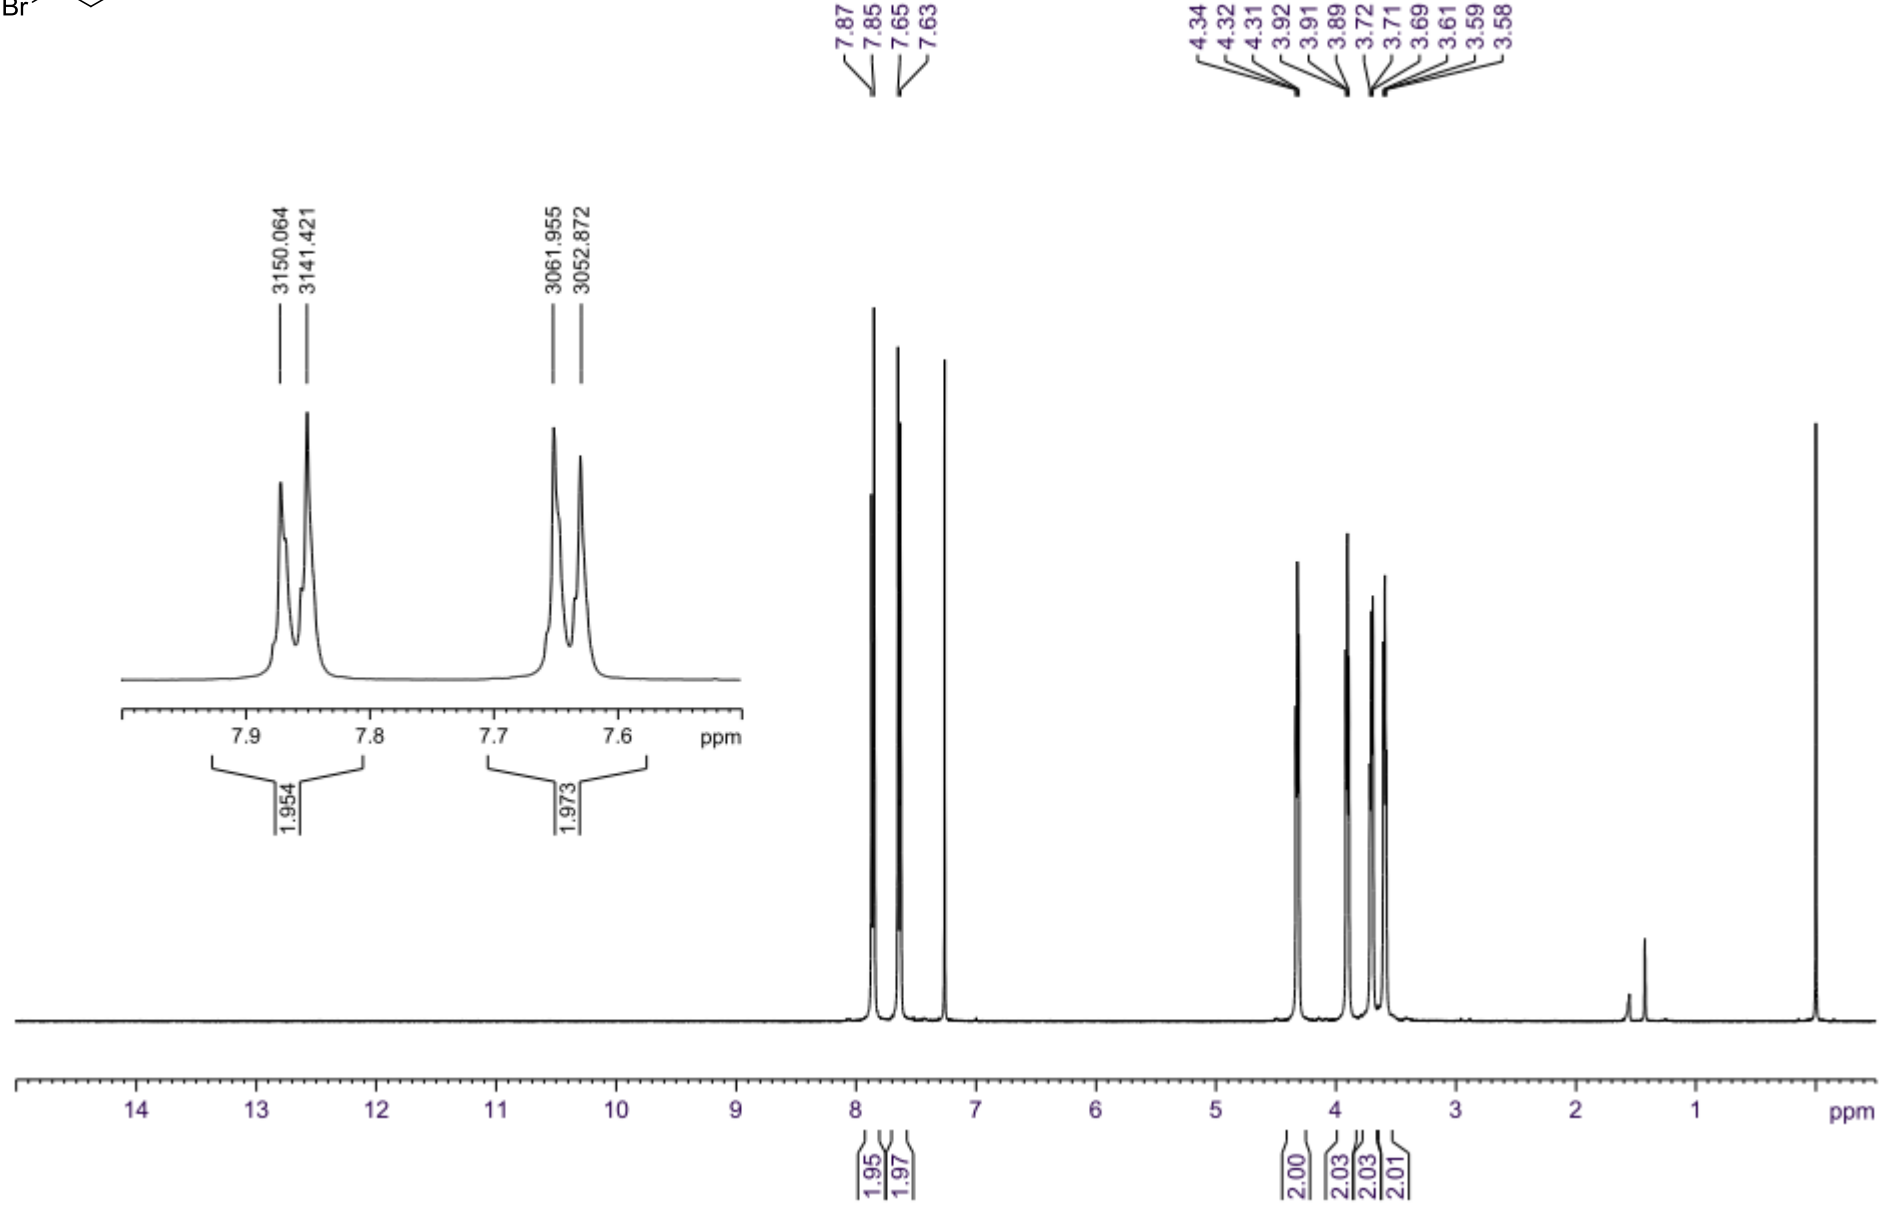

*1-(4-Bromophenyl)-2-morpholino-2-thioxoethanone (28)*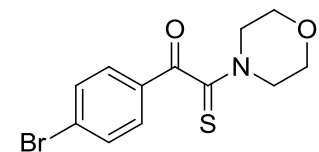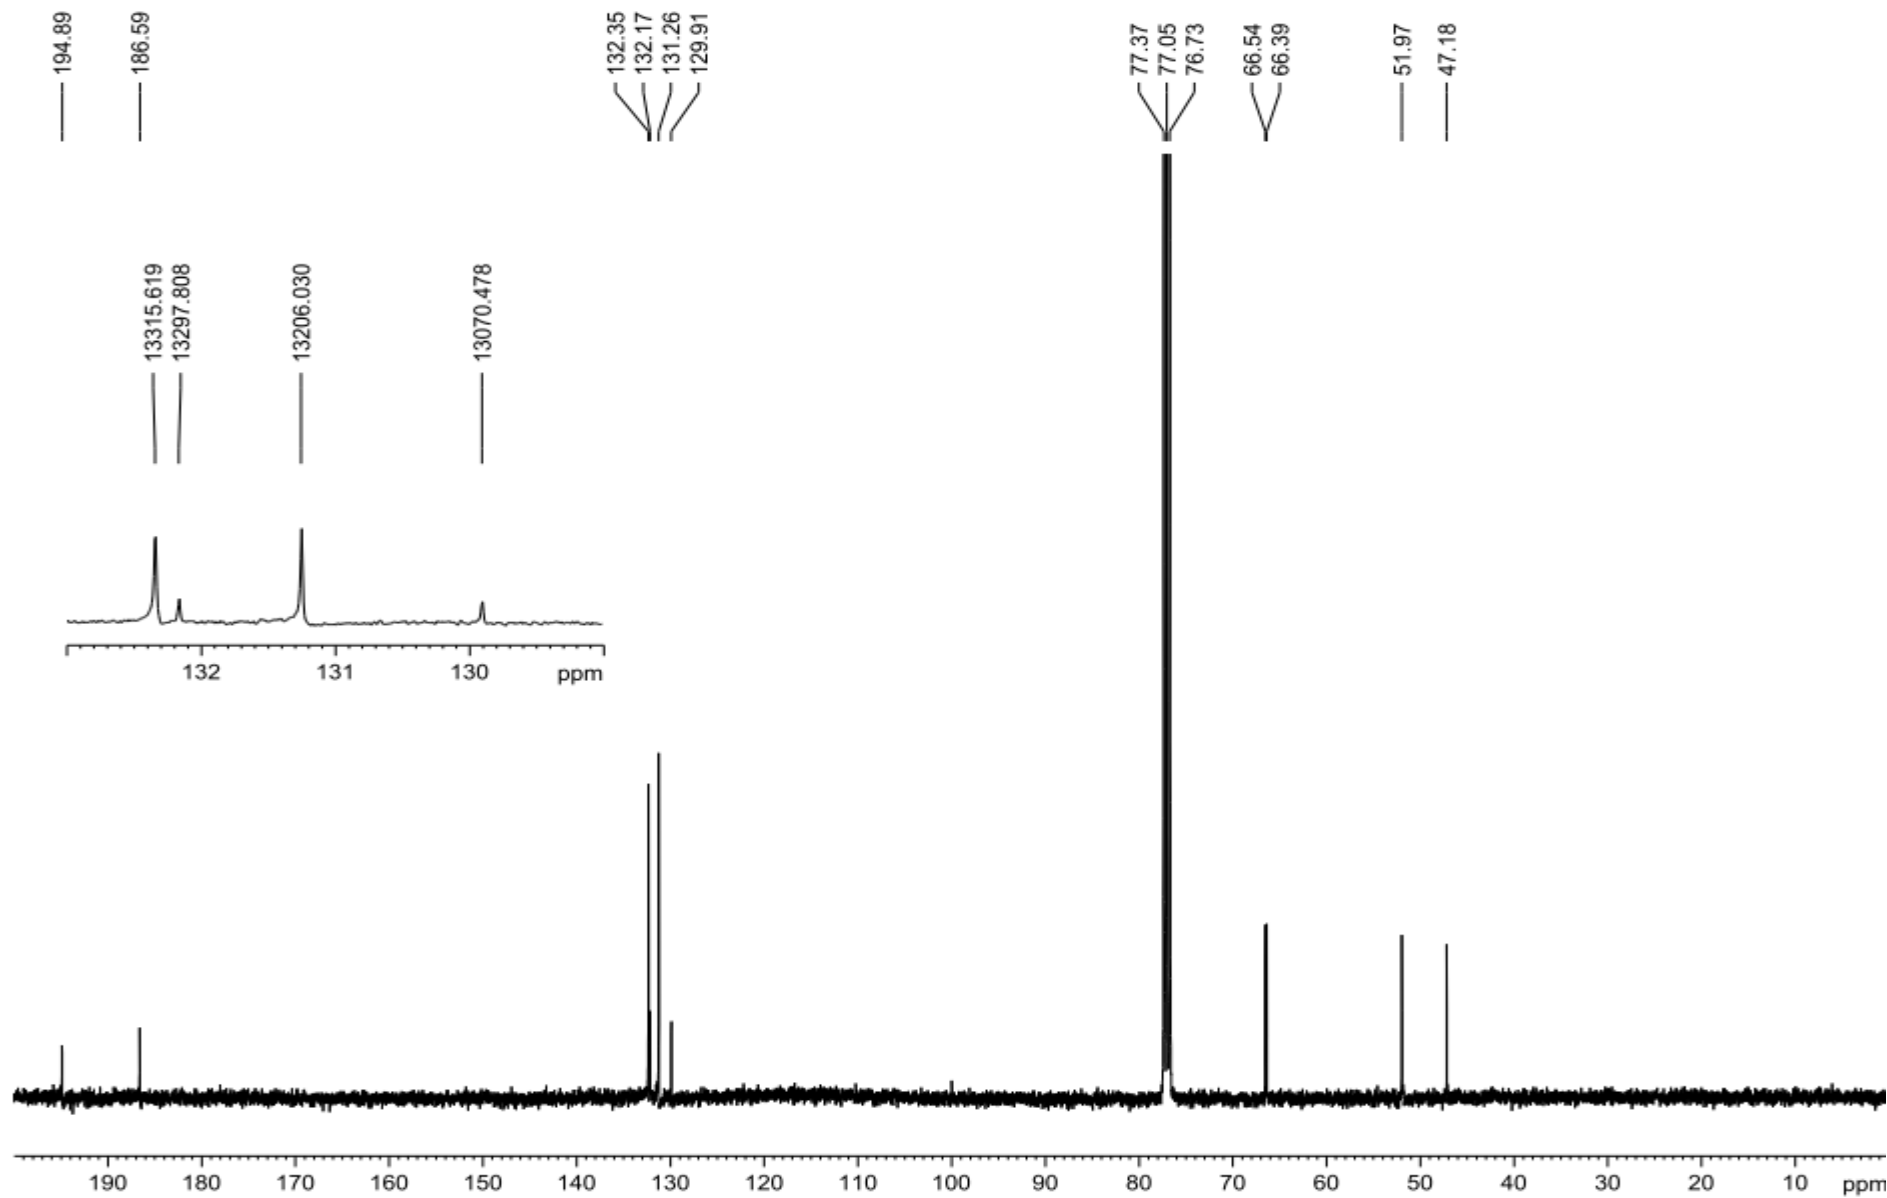

*1-(2-Iodophenyl)-2-morpholino-2-thioxoethanone (29)*

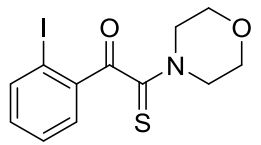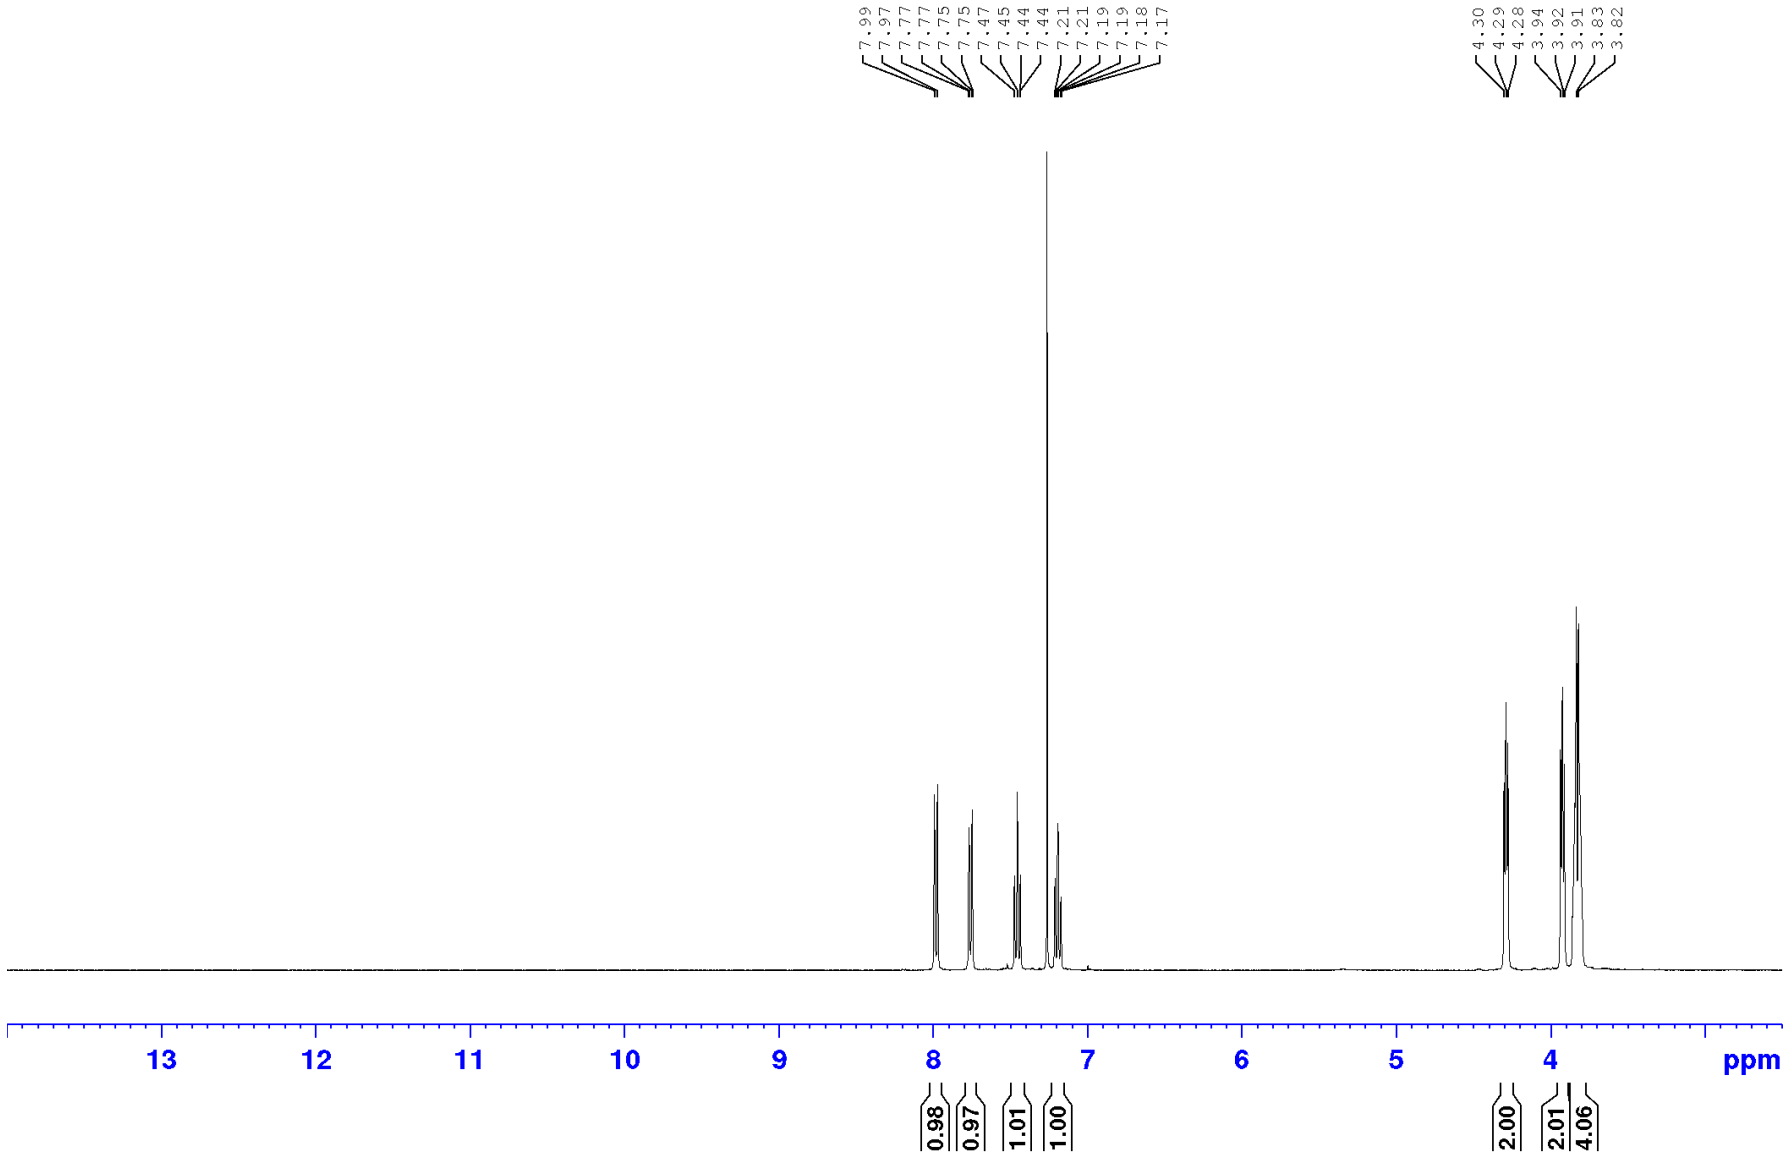

*1-(3-Iodophenyl)-2-morpholino-2-thioxoethanone (30)*

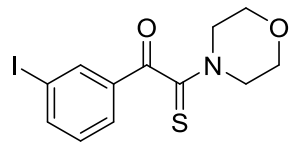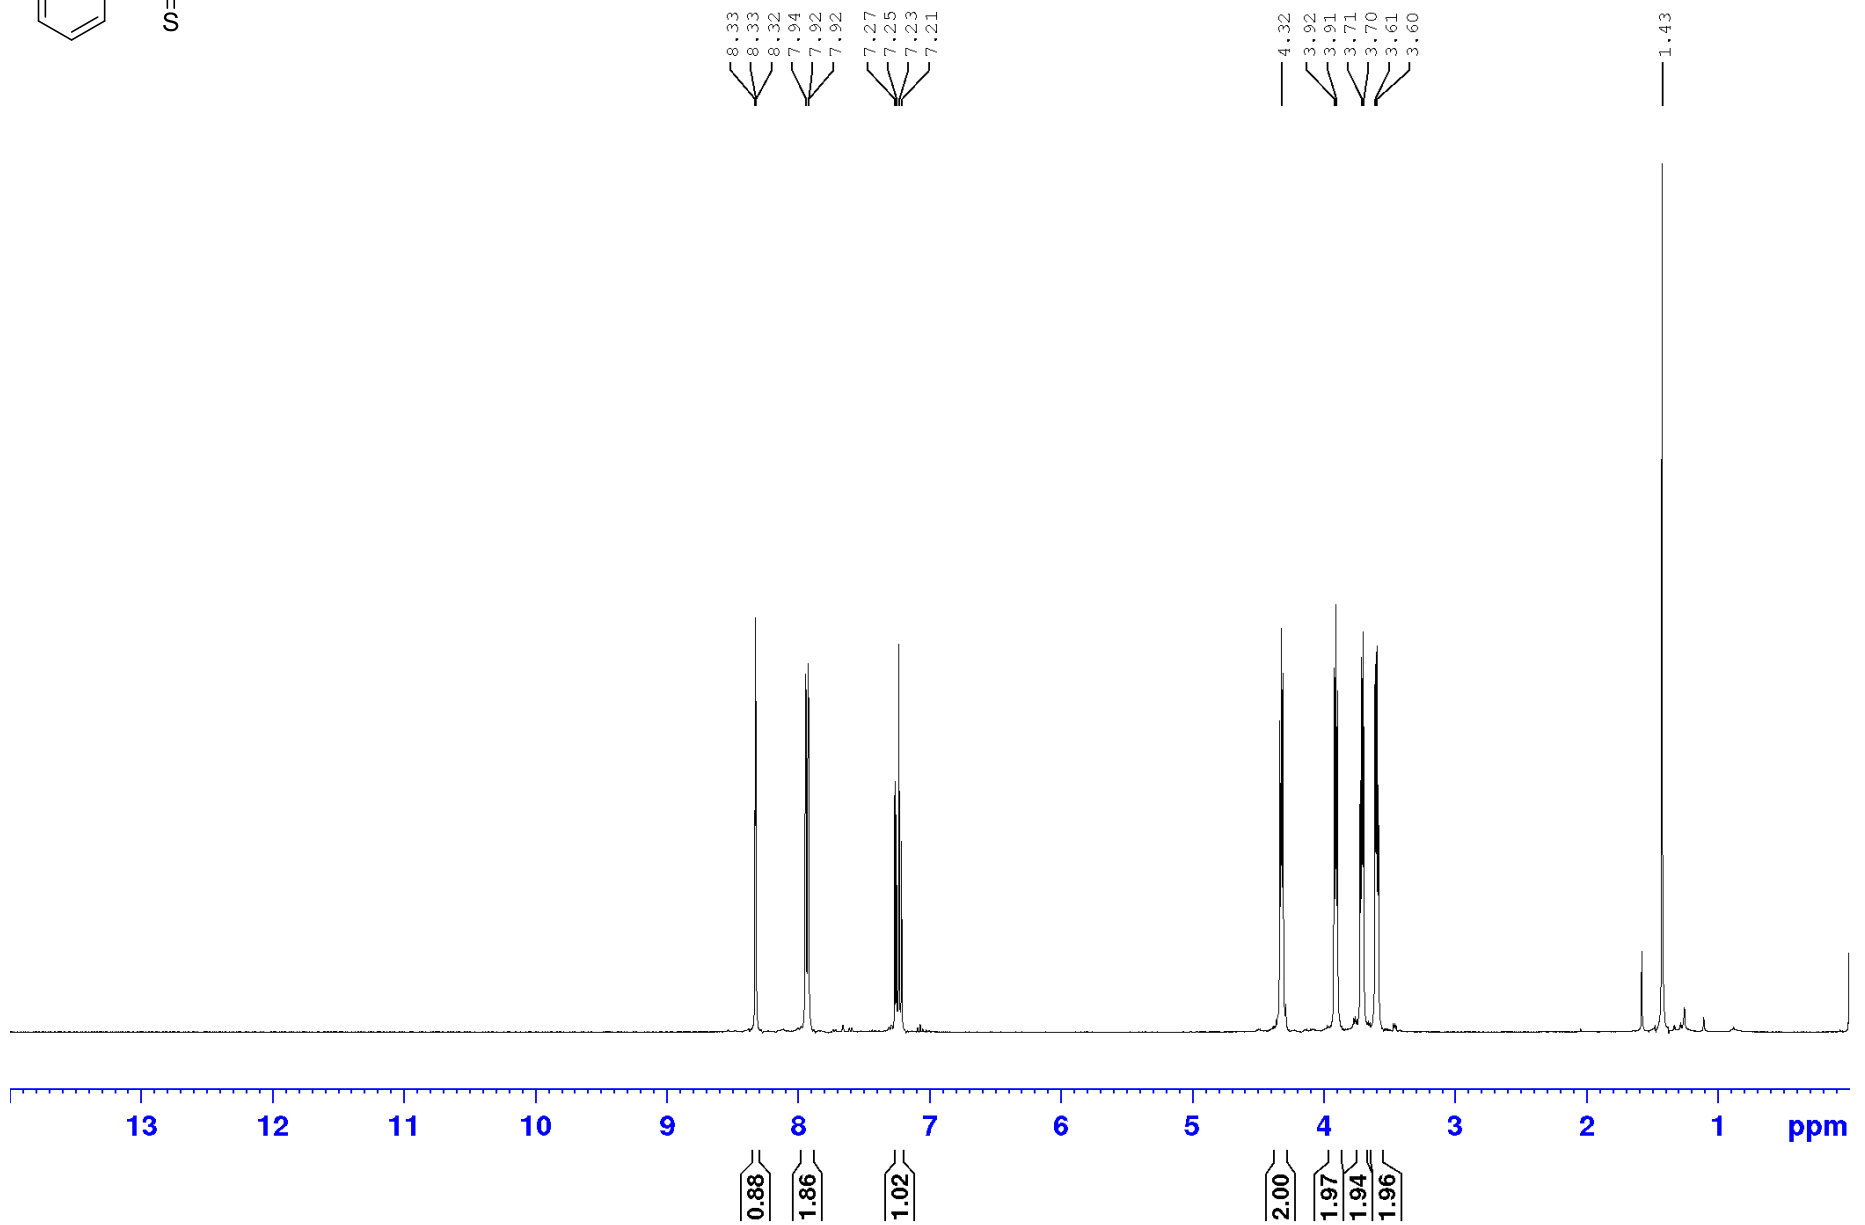

1-(3-Iodophenyl)-2-morpholino-2-thioxoethanone (30)

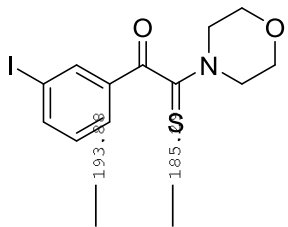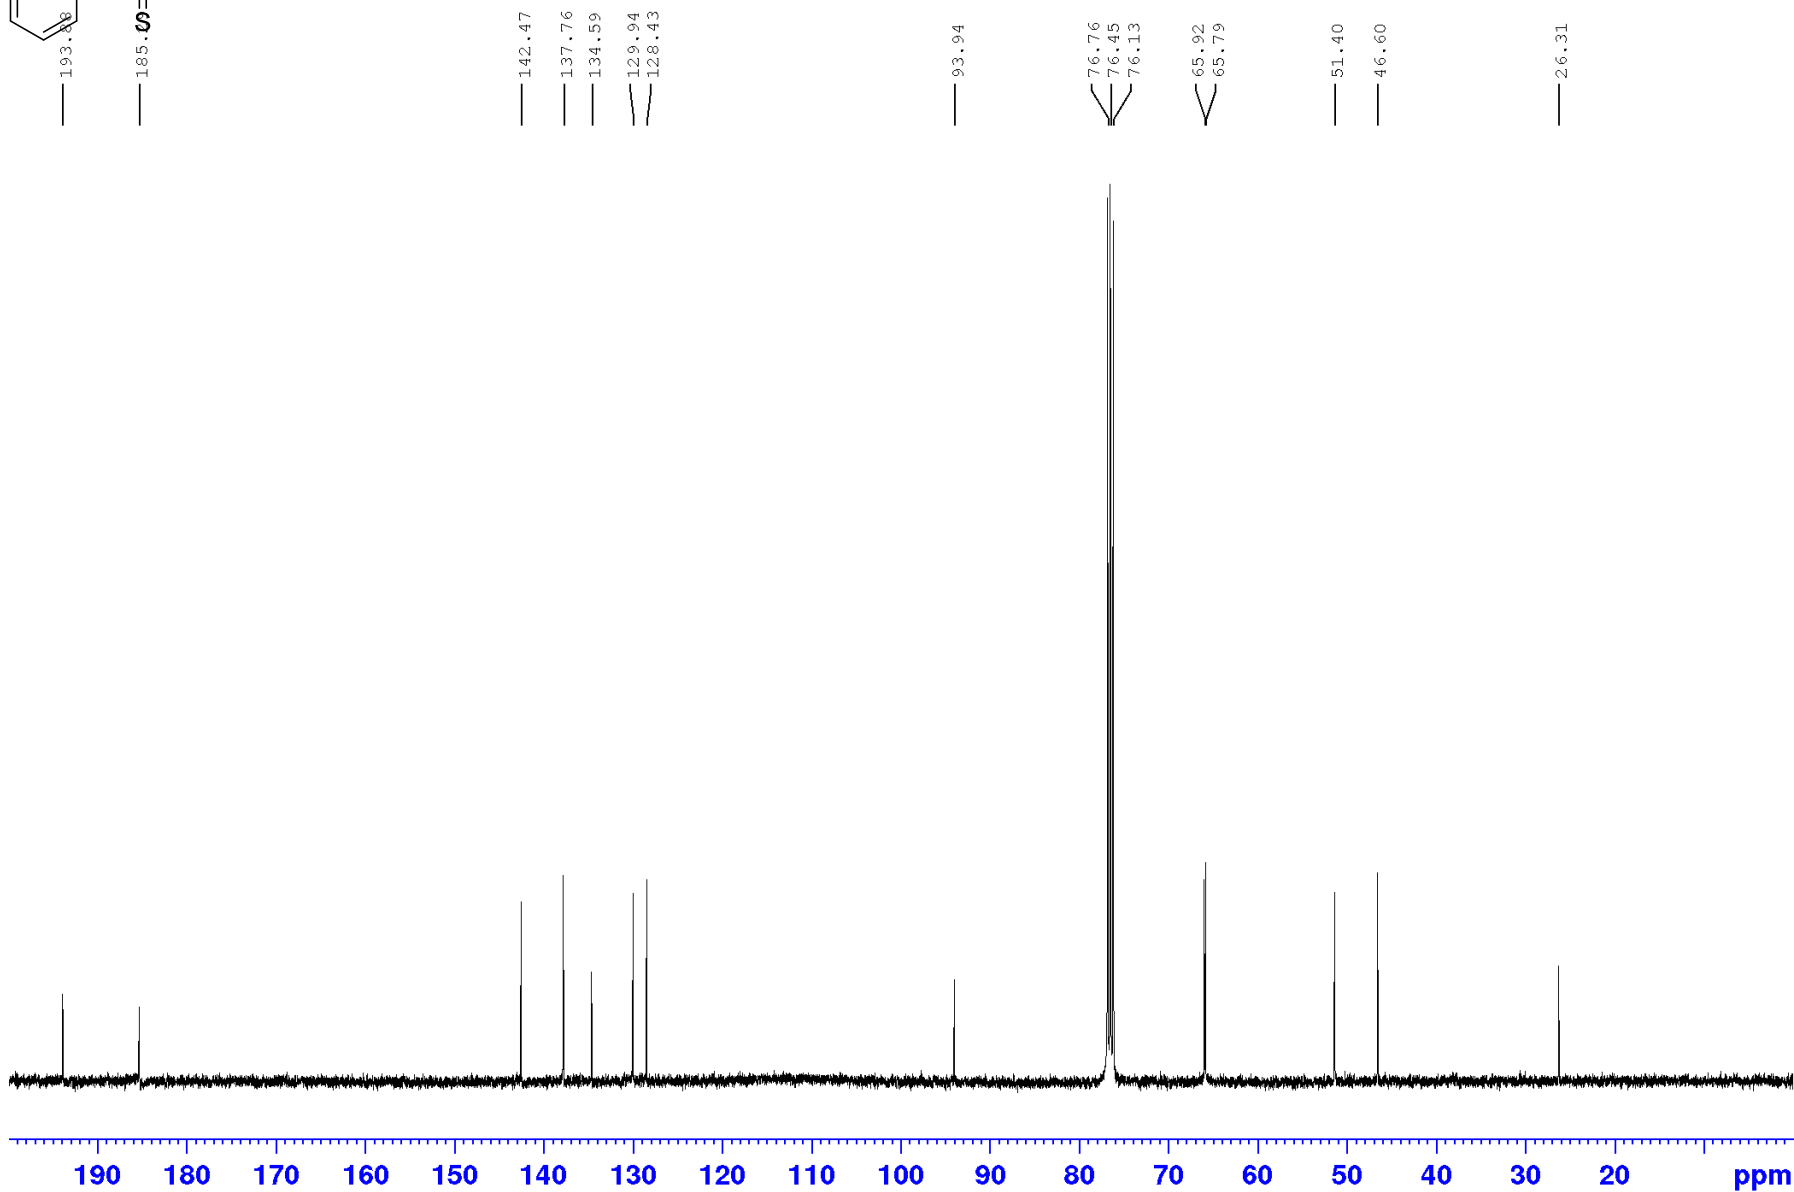



*1-(4-Iodophenyl)-2-morpholino-2-thioxoethanone (31)*

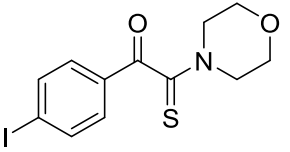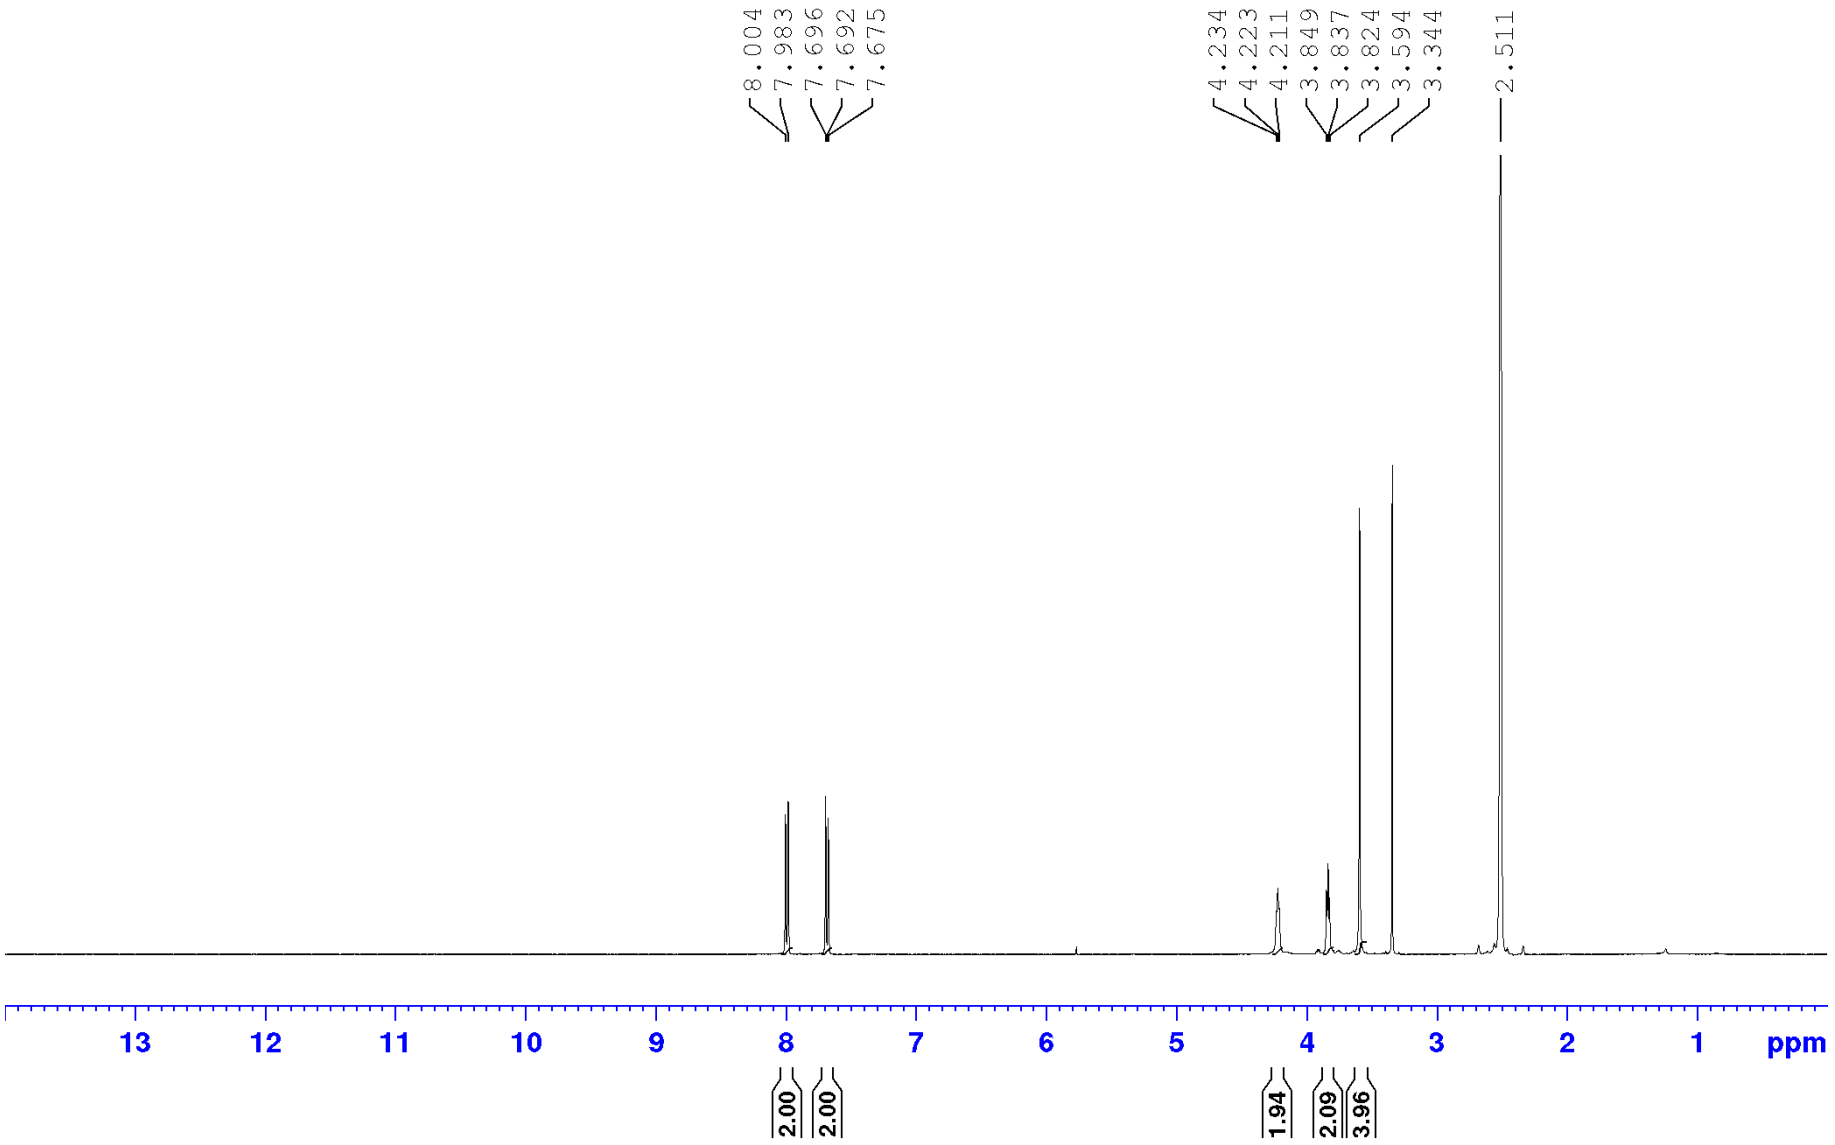

*1-(4-Iodophenyl)-2-morpholino-2-thioxoethanone (31)*

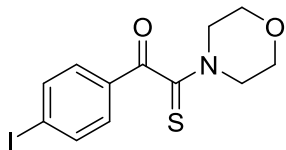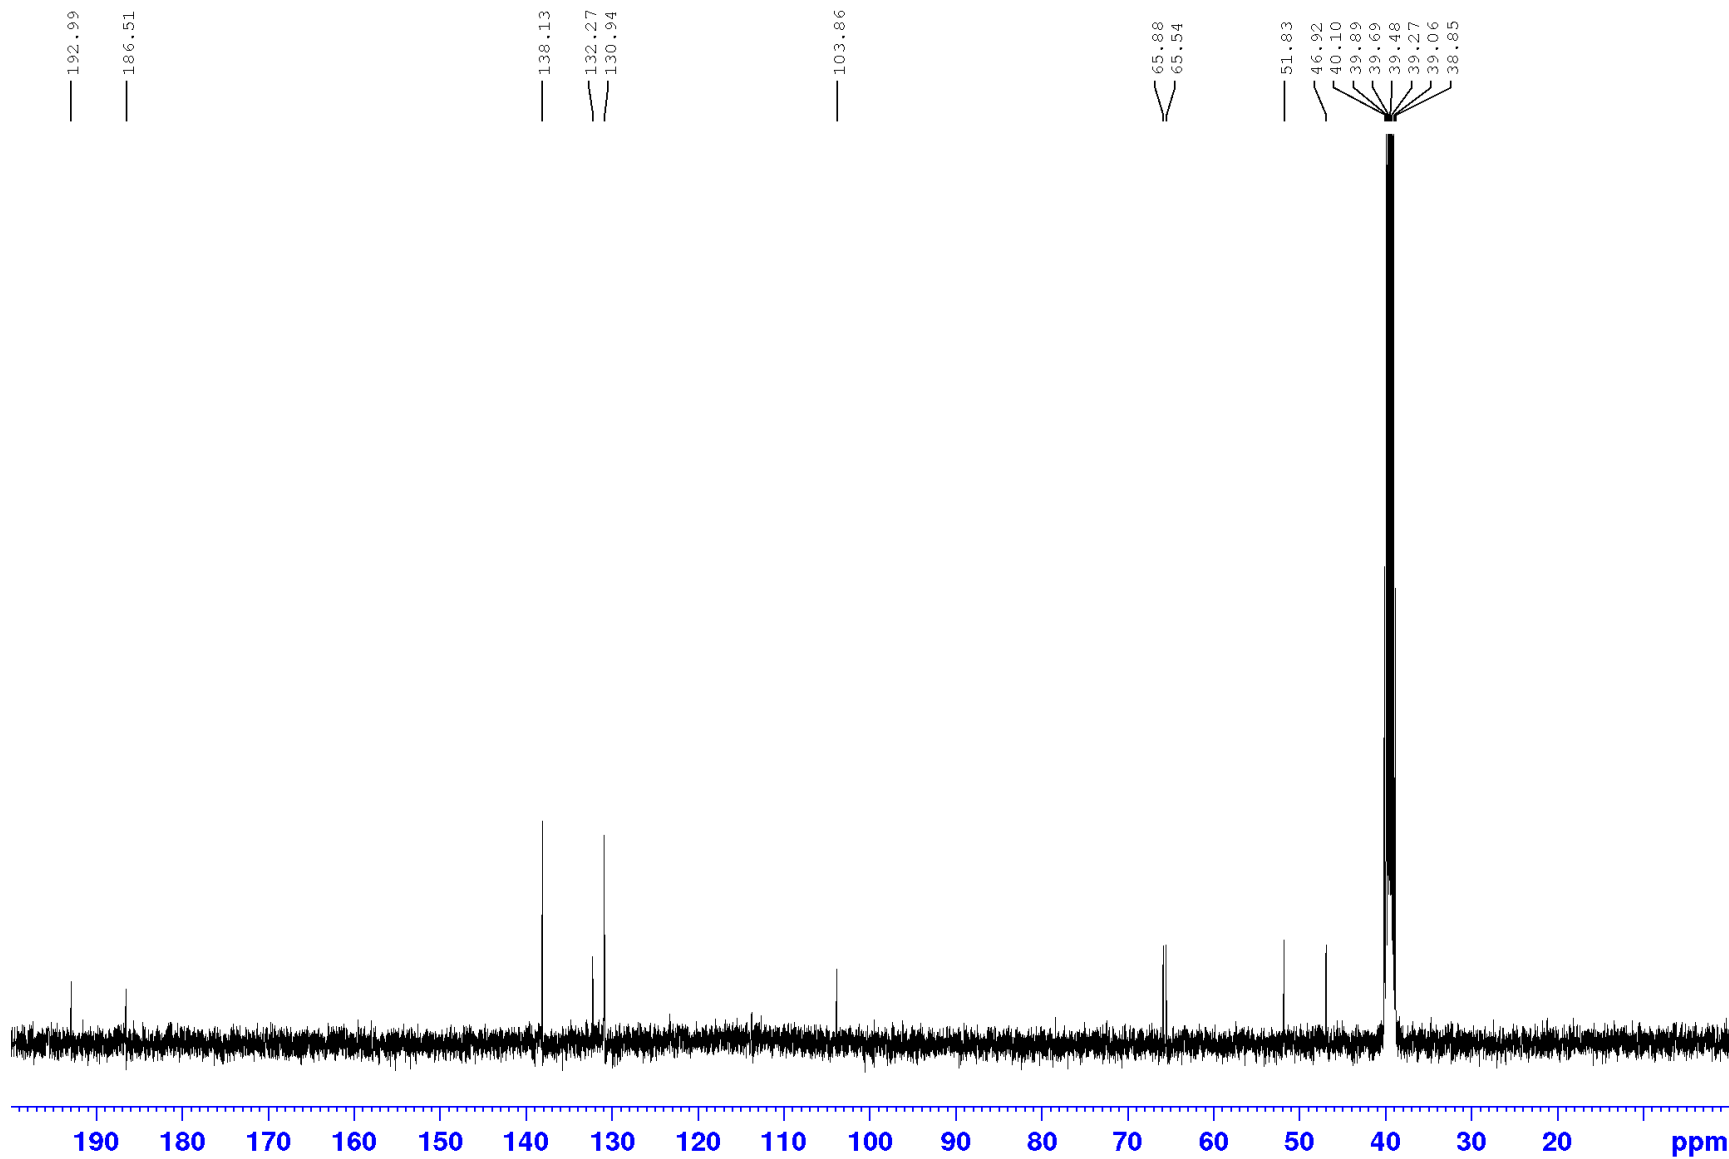

*1-(2-Nitrophenyl)-2-morpholino-2-thioxoethanone (32)*

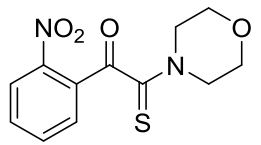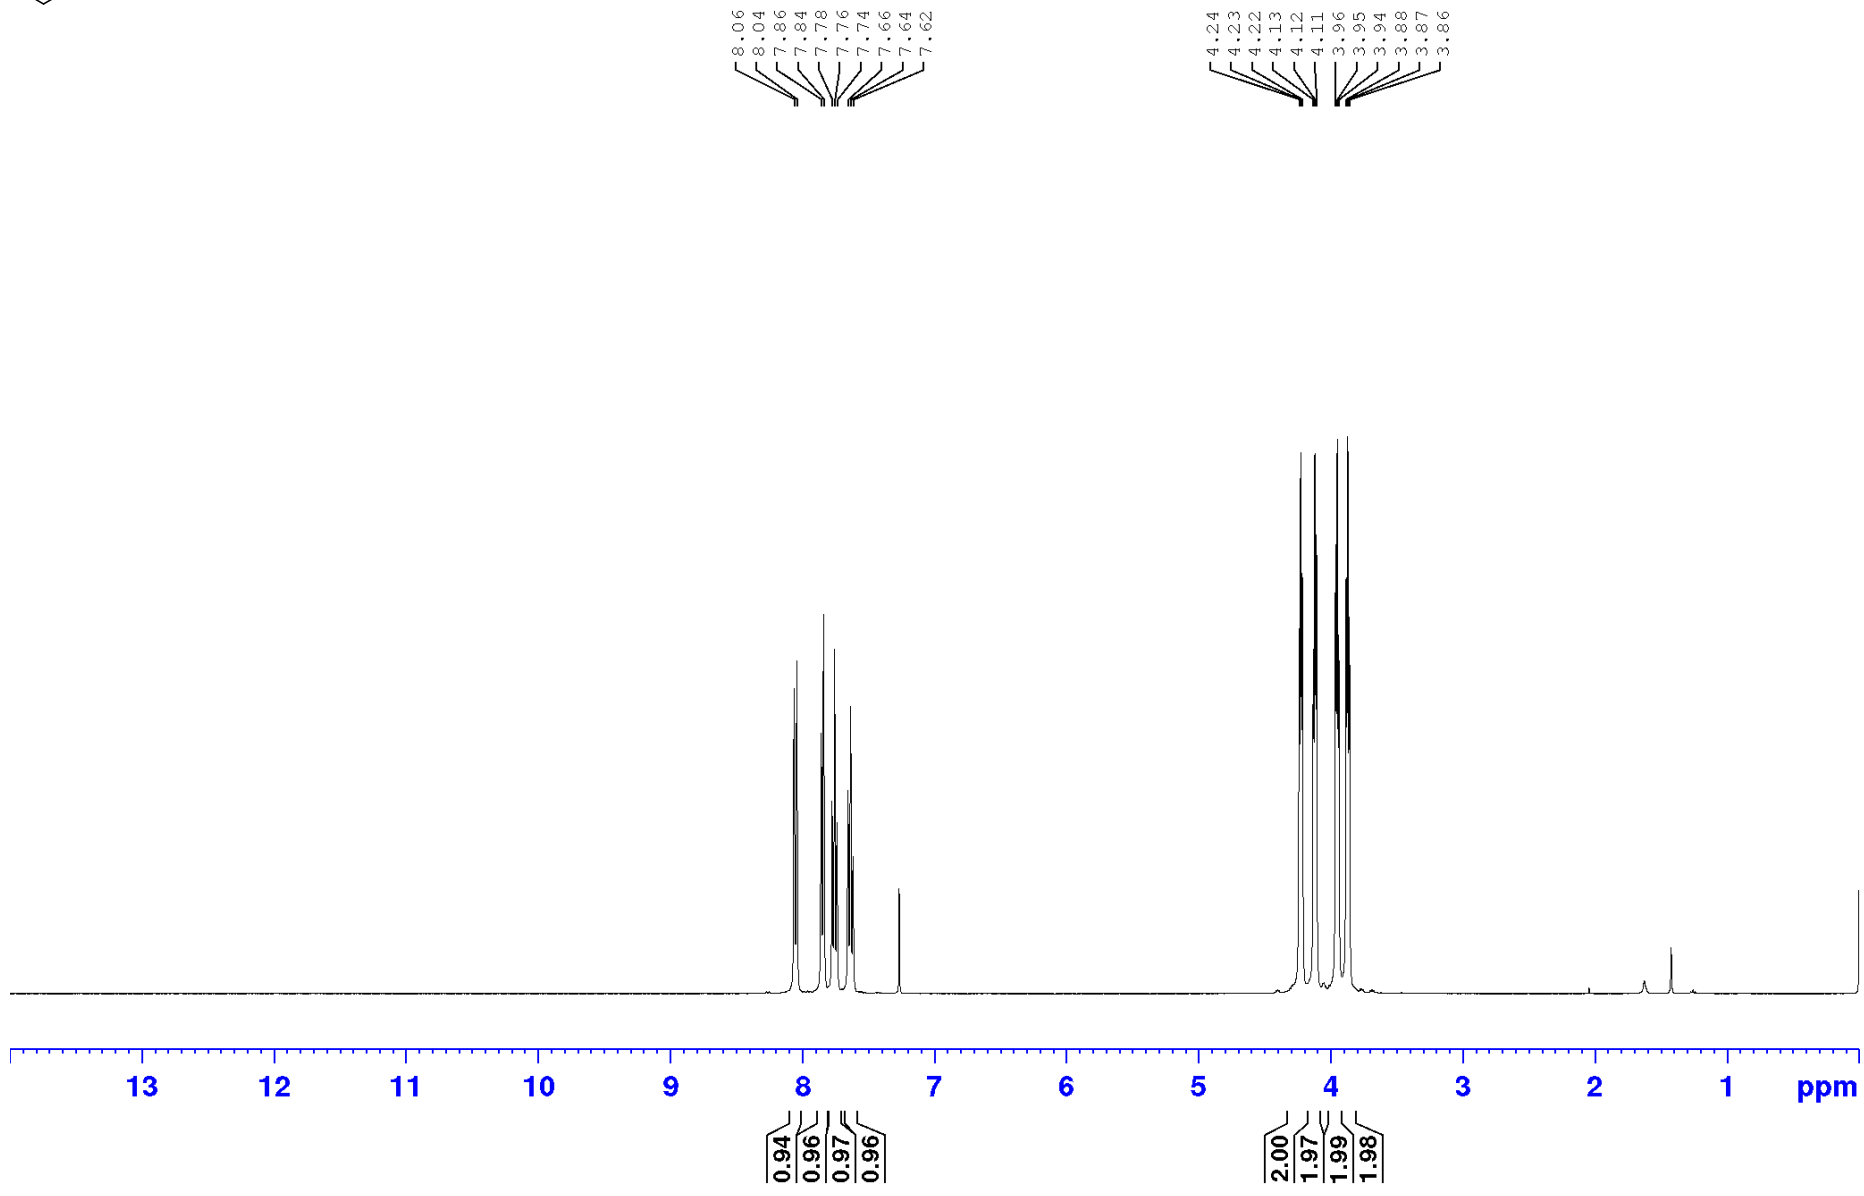

*1-(2-Nitrophenyl)-2-morpholino-2-thioxoethanone (32)*

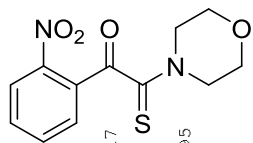

191.17  
182.95  
145.78  
134.92  
134.03  
132.57  
131.70  
123.84  
77.41  
77.29  
77.09  
76.77  
66.71  
66.36  
52.33  
49.06

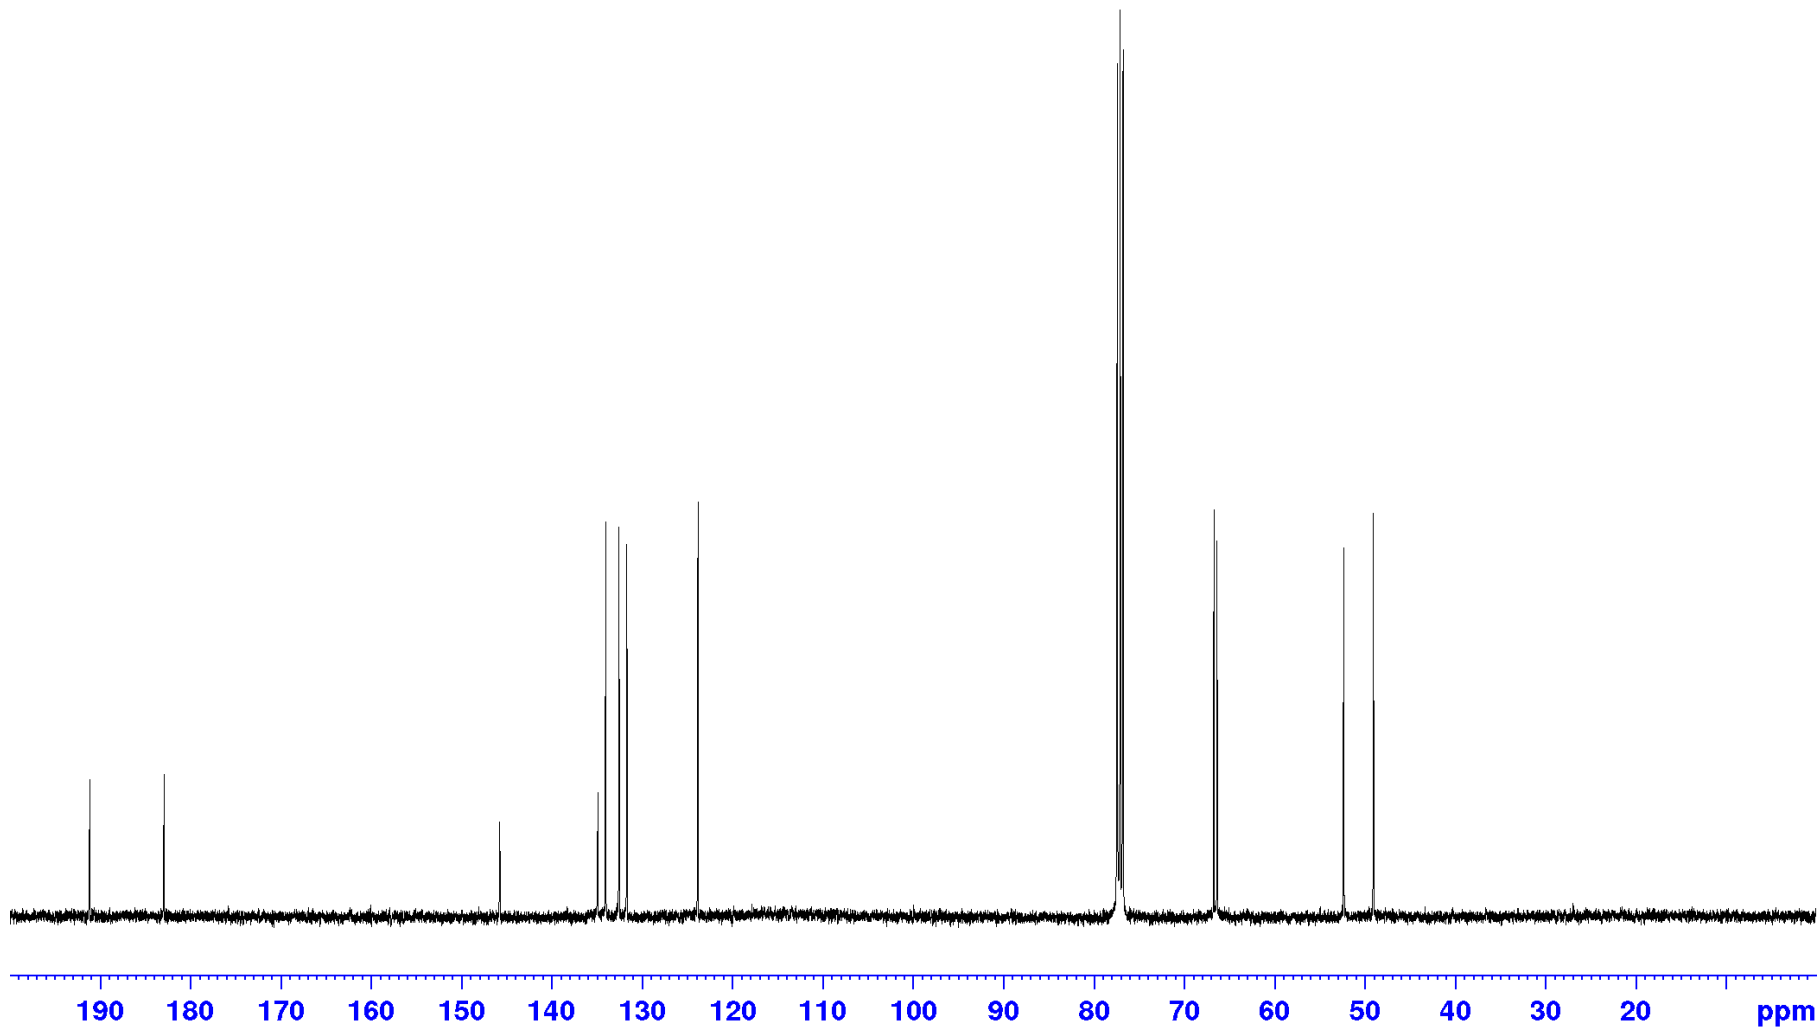

*1-(3-Nitrophenyl)-2-morpholino-2-thioxoethanone (33)*

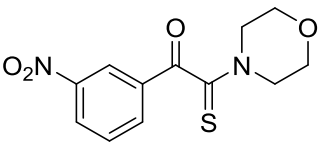

8.805  
8.801  
8.796  
8.474  
8.472  
8.469  
8.467  
8.454  
8.451  
8.448  
8.446  
8.353  
8.350  
8.347  
8.334  
8.331  
8.328  
7.737  
7.717  
7.697

4.368  
4.356  
4.344  
3.956  
3.944  
3.932  
3.749  
3.736  
3.662  
3.649

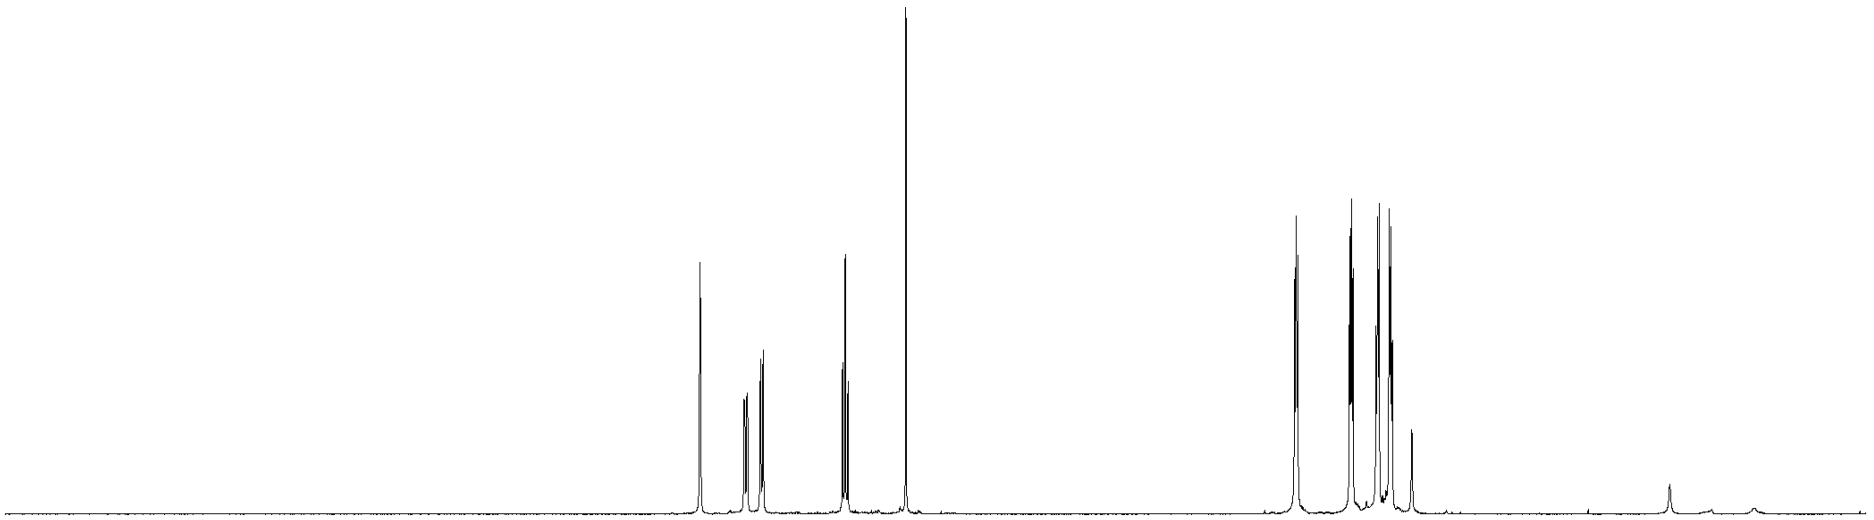

13 12 11 10 9 8 7 6 5 4 3 2 1 ppm

0.88  
0.93  
0.95  
0.97

2.00  
2.07  
2.21  
2.02

*1-(3-Nitrophenyl)-2-morpholino-2-thioxoethanone (33)*

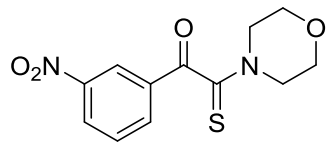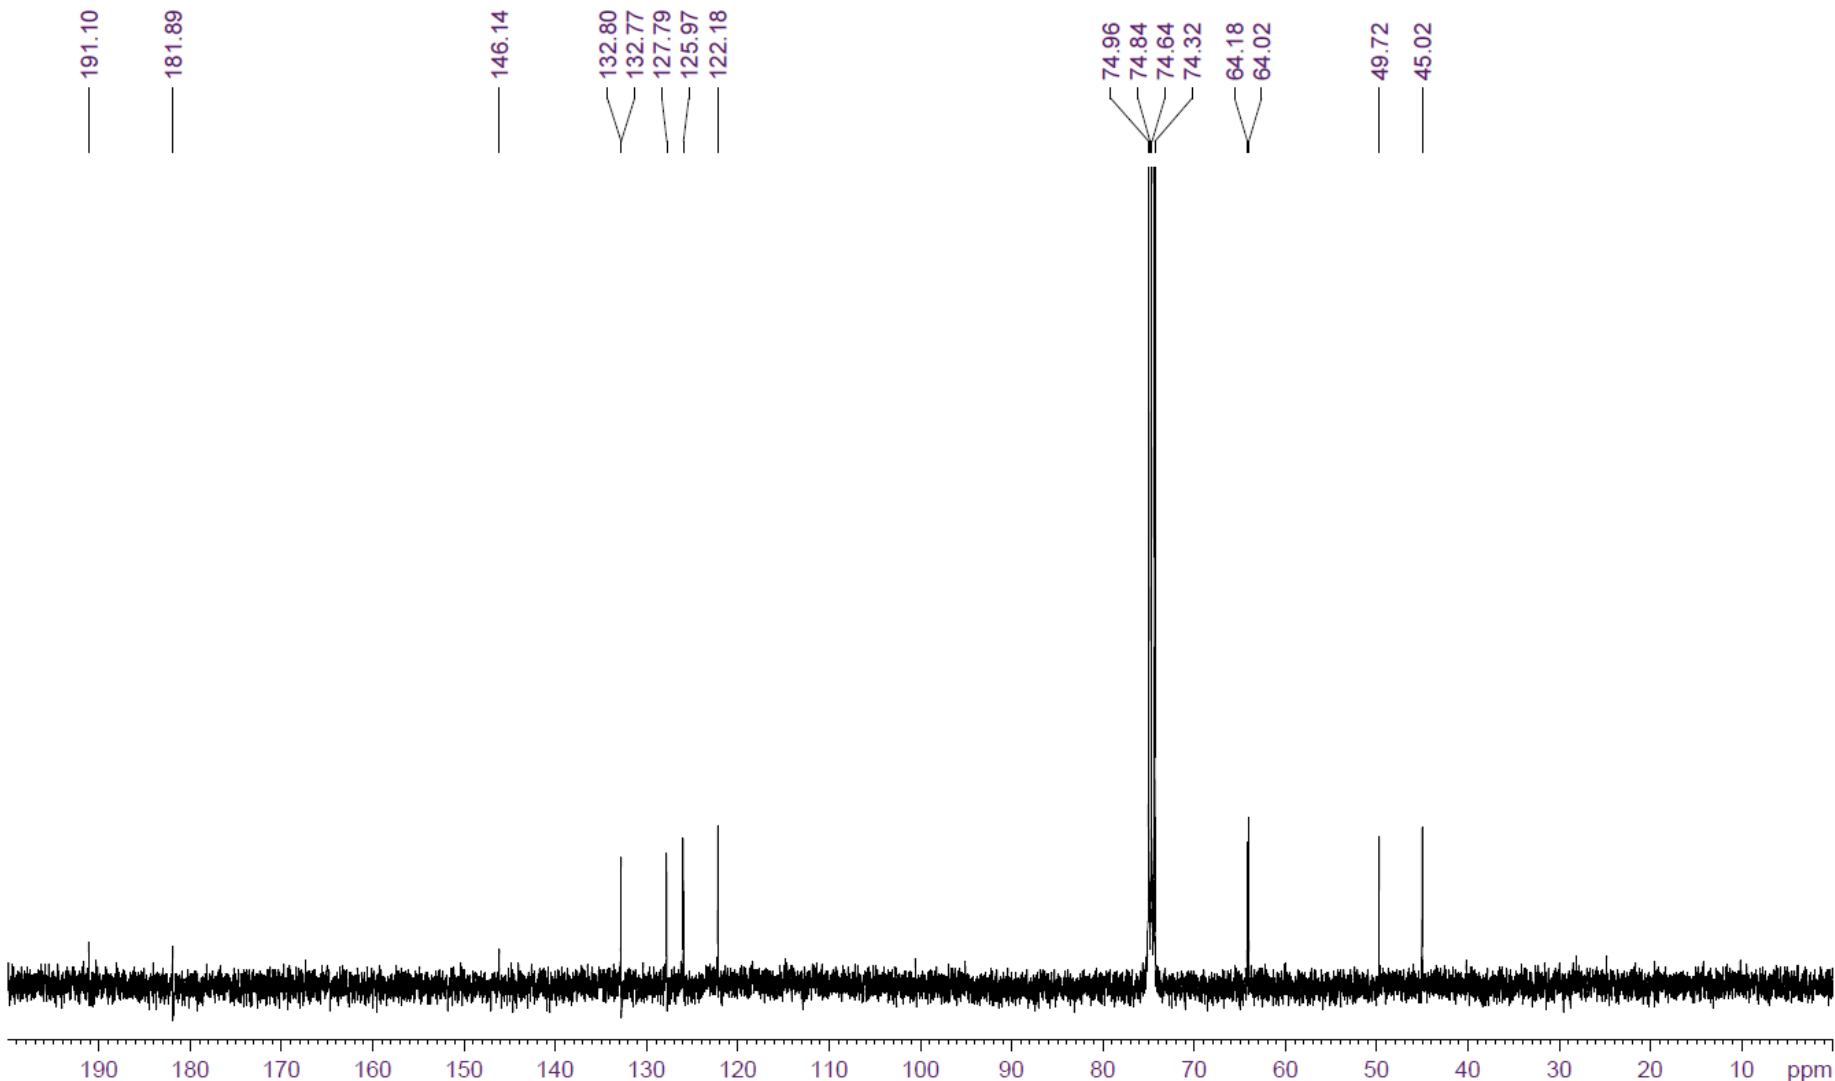

*1-(4-Nitrophenyl)-2-morpholino-2-thioxoethanone (34)*

**<sup>1</sup>H NMR**

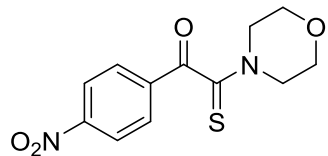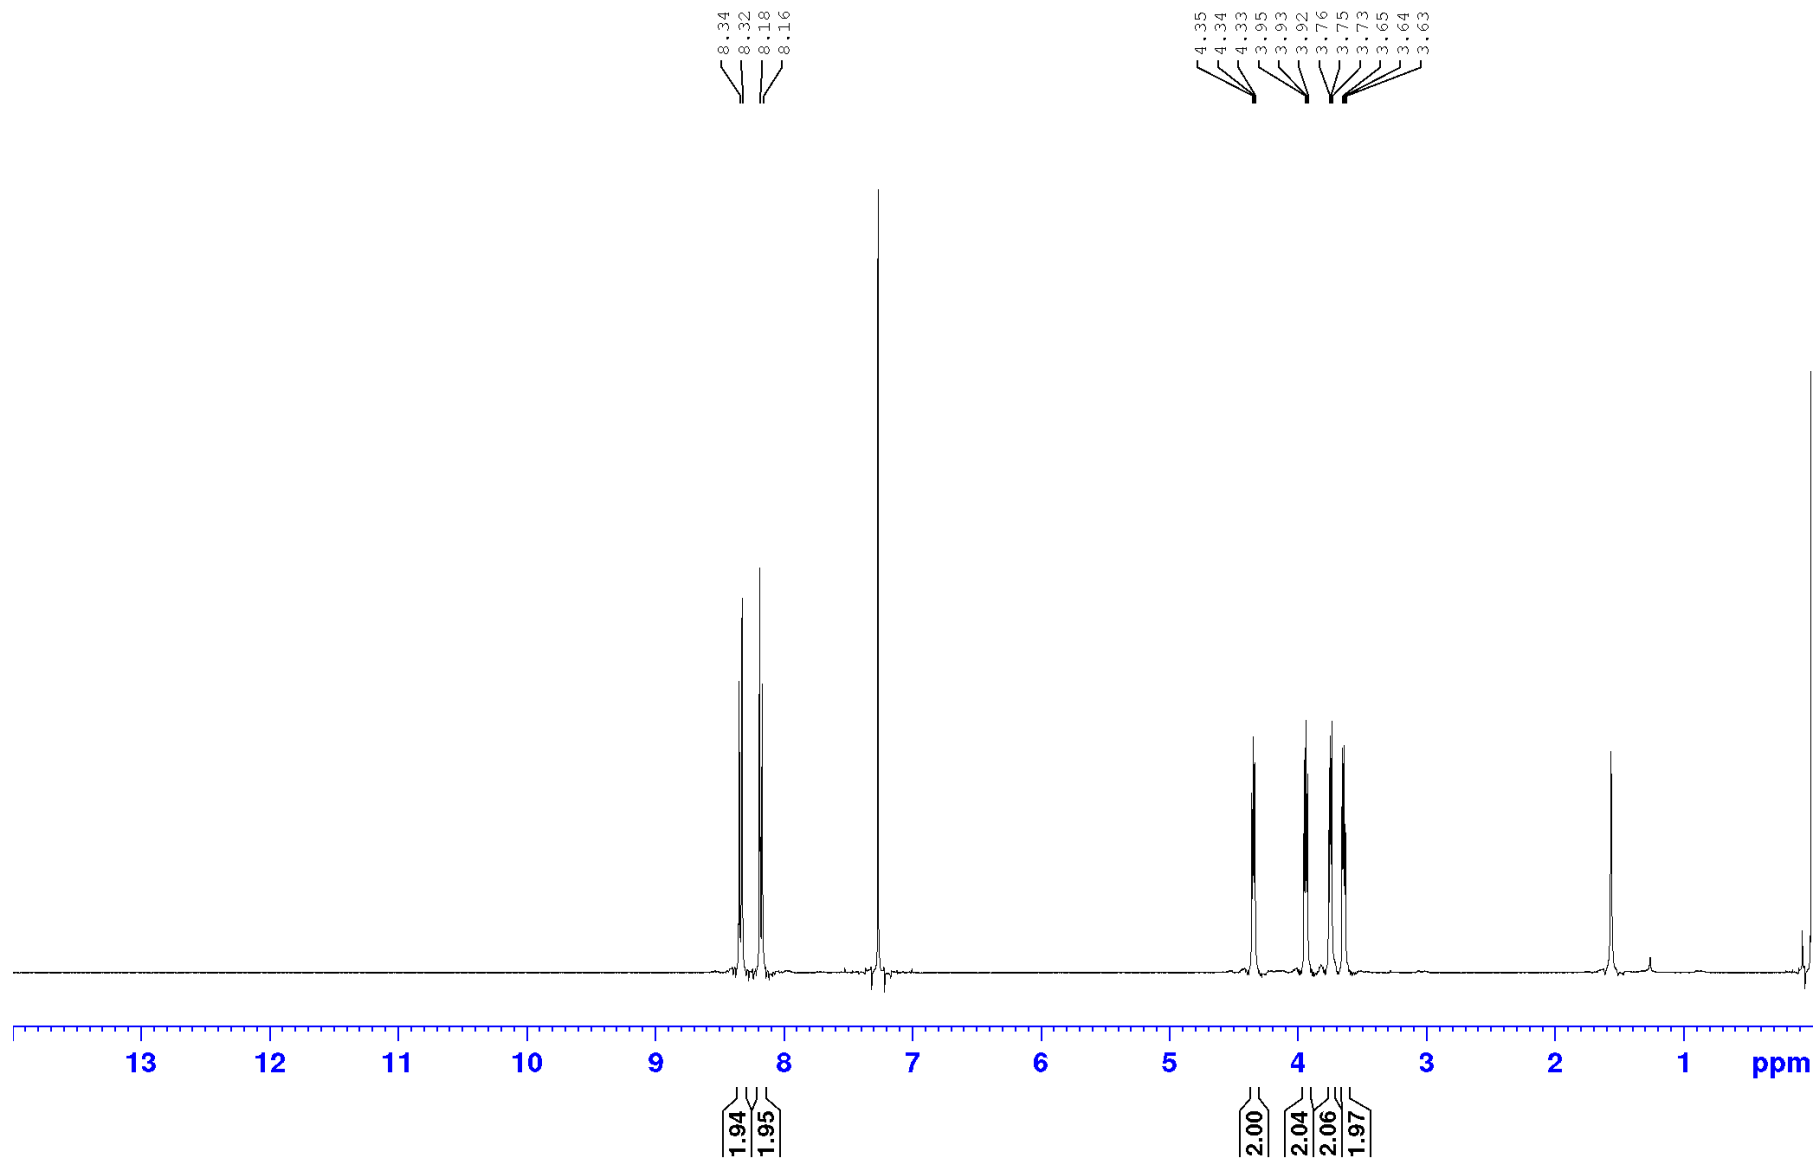

1-([1,1'-biphenyl]-4-yl)-2-morpholino-2-thioxoethanone (35)

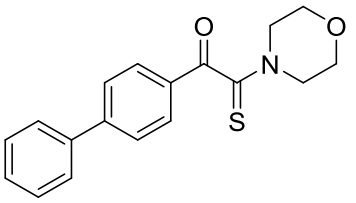

8.08  
8.05  
7.72  
7.70  
7.63  
7.63  
7.61  
7.50  
7.48  
7.46  
7.44  
7.42  
7.26

4.37  
4.35  
4.34  
3.93  
3.92  
3.91  
3.72  
3.71  
3.65  
3.64

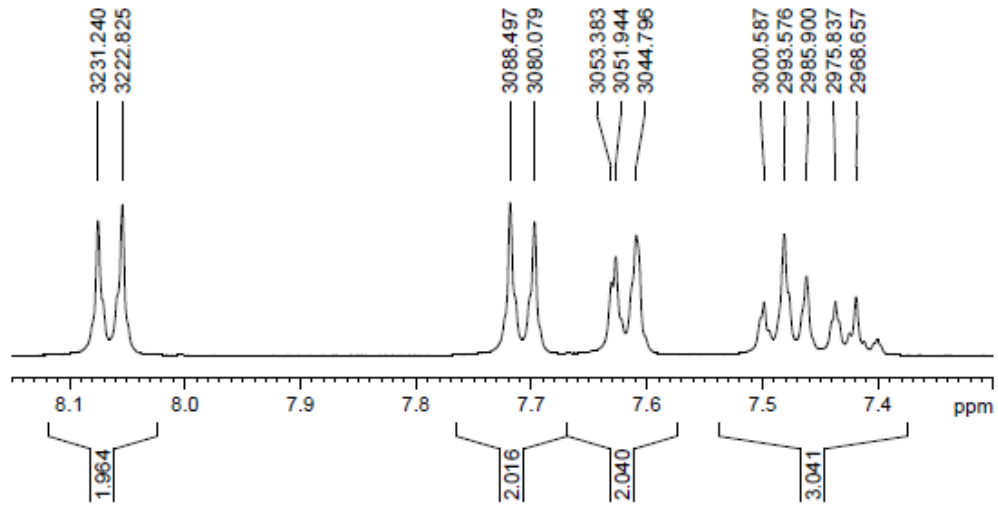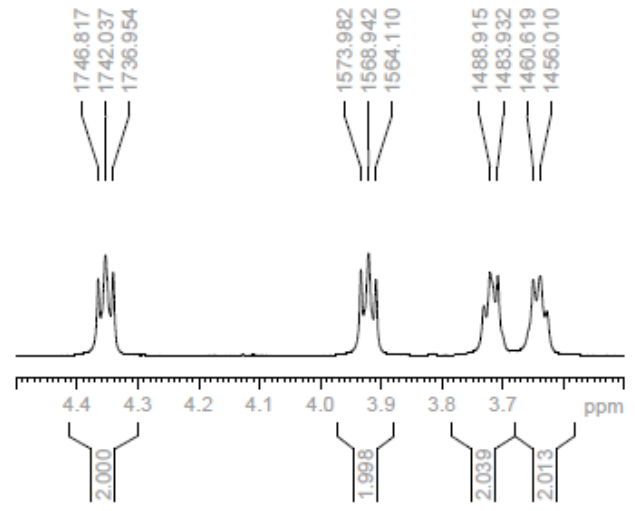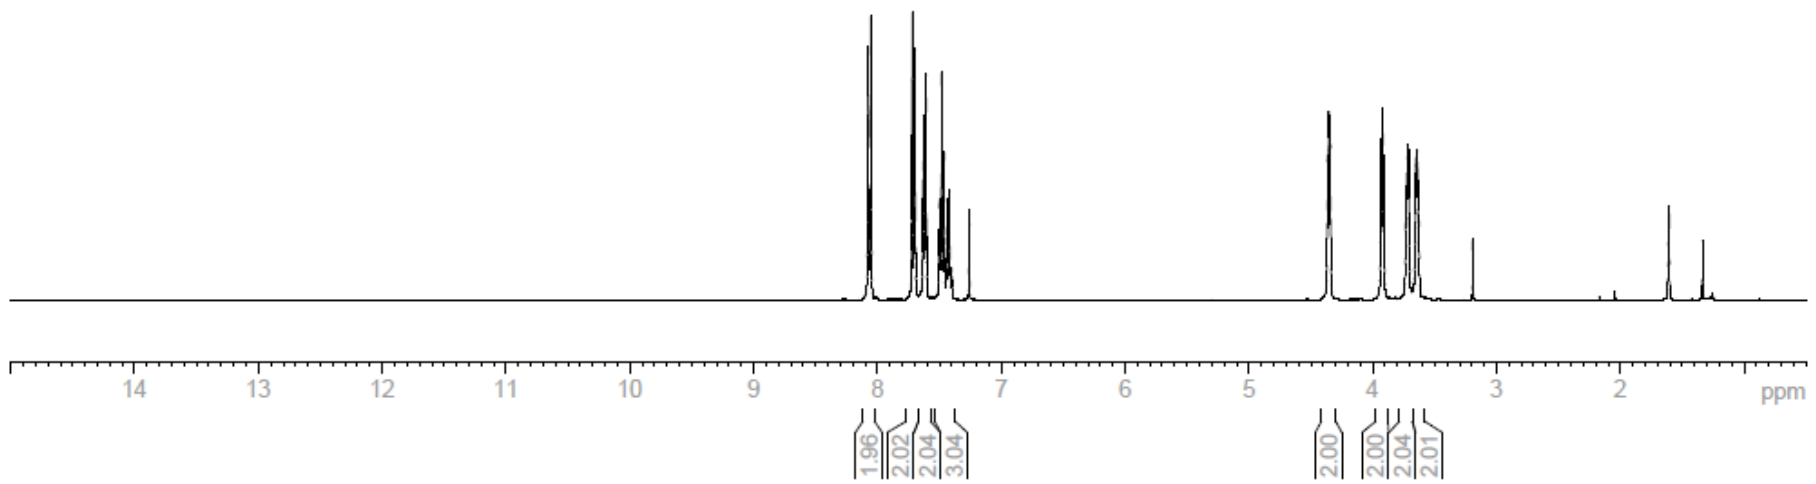



*1-([1,1'-biphenyl]-4-yl)-2-morpholino-2-thioxoethanone (35)*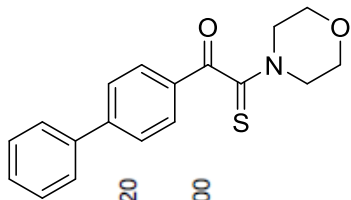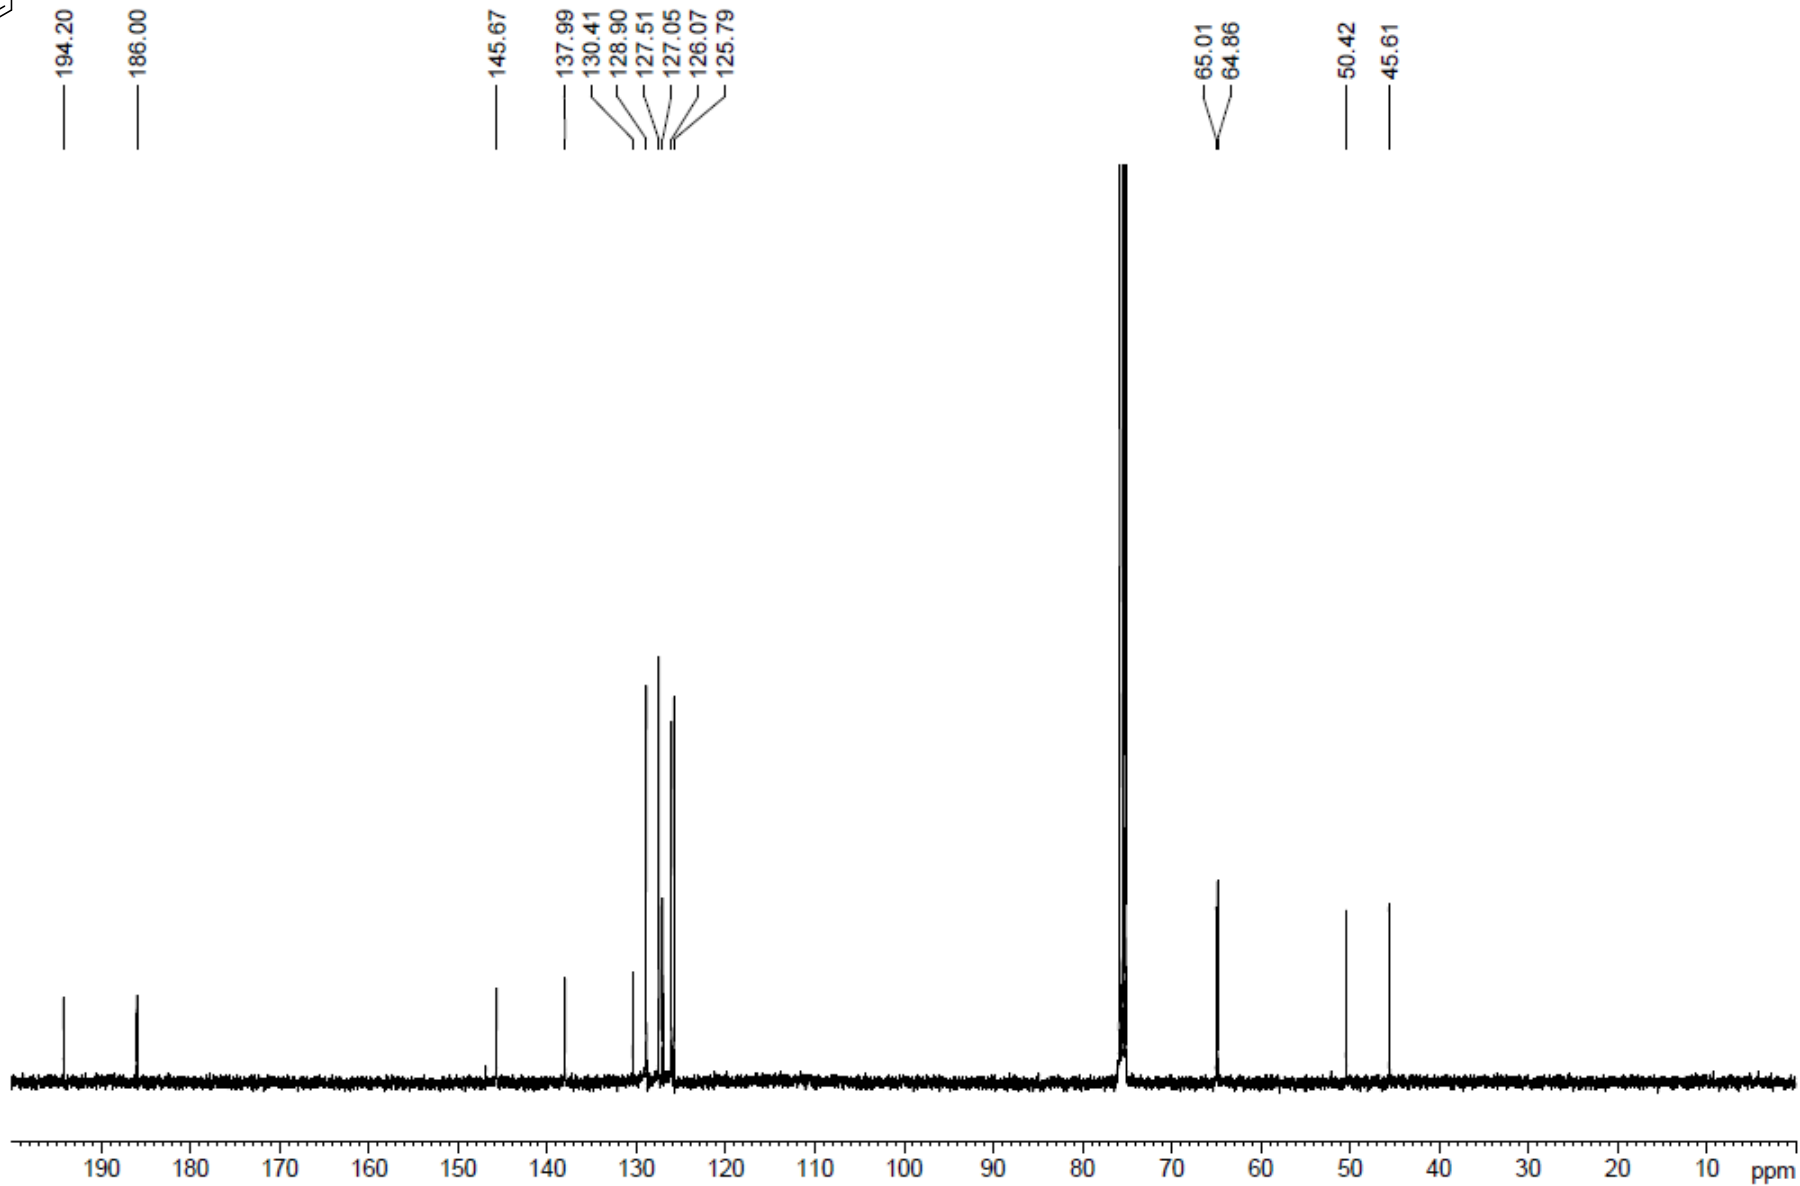

Supplement: NIHMS902889-supplement.pdf [file NIHMS902889-supplement.pdf]
